# Supplementary material for: Large scale analysis of amino acid substitutions in bacterial proteomics
Source: BMC Bioinformatics. 2016 Nov 8;17:450. doi: 10.1186/s12859-016-1301-5 (PMC5100282; doi:10.1186/s12859-016-1301-5)
Supplement: Supplementary file 1 — Supplementary materials with Figures S1-S12 and Tables S1-S5. (PDF 855 kb) [file 12859_2016_1301_MOESM1_ESM.pdf]

## SUPPLEMENTARY MATERIALS

# Large scale analysis of amino acid substitutions in bacterial proteomics

Dmitry Ischenko<sup>1,2\*</sup>, Dmitry Alexeev<sup>1,2</sup>, Egor Shitikov<sup>1</sup>, Alexandra Kanygina<sup>1,2</sup>, Maja Malakhova<sup>1</sup>, Elena Kostryukova<sup>1</sup>, Andrey Larin<sup>1</sup>, Sergey Kovalchuk<sup>1</sup>, Olga Pobeguts<sup>1</sup>, Ivan Butenko<sup>1</sup>, Nikolay Anikanov<sup>1</sup>, Ilya Altukhov<sup>1,2</sup>, Elena Ilina<sup>1</sup> and Vadim Govorun<sup>1</sup>

\*Correspondence:

[dmitry.ischenko@phystech.edu](mailto:dmitry.ischenko@phystech.edu)

<sup>1</sup> Research Institute of Physical  
Chemical Medicine, Malaya  
Pirogovskaya, 1a, 119435  
Moscow, Russian Federation  
Full list of author information is  
available at the end of the article

### Abstract

**Background:** Proteomics of bacterial pathogens is a developing field exploring microbial physiology, gene expression and the complex interactions between bacteria and their hosts. One of the complications in proteomic approach is micro- and macro-heterogeneity of bacterial species, which makes it impossible to build a comprehensive database of bacterial genomes for identification, while most of the existing algorithms rely largely on genomic data.

**Results:** Here we present a large scale study of identification of single amino acid polymorphisms between bacterial strains. An *ad hoc* method was developed based on MS/MS spectra comparison without the support of a genomic database. Whole-genome sequencing was used to validate the accuracy of polymorphism detection. Several approaches presented earlier to the proteomics community as useful for polymorphism detection were tested on isolates of *Helicobacter pylori*, *Neisseria gonorrhoeae* and *Escherichia coli*.

**Conclusion:** The developed method represents a perspective approach in the field of bacterial proteomics allowing to identify hundreds of peptides with novel SAPs from a single proteome.

**Keywords:** Spectral library; SAP

# Contents

|                                                                             |           |
|-----------------------------------------------------------------------------|-----------|
| <b>Abstract</b>                                                             | <b>1</b>  |
| <b>1 Standard procedures</b>                                                | <b>3</b>  |
| 1.1 Protein database construction and spectra identification with Mascot    | 3         |
| 1.2 Sequence assignment and spectral library construction . . . . .         | 3         |
| 1.3 Estimation of the number of polymorphisms based on genomic data         | 3         |
| <b>2 Algorithm</b>                                                          | <b>4</b>  |
| 2.1 Vector representation of spectra and angle calculation . . . . .        | 4         |
| 2.2 Detection of identical spectra . . . . .                                | 5         |
| 2.2.1 Transformation methods . . . . .                                      | 5         |
| 2.2.2 Parameters estimation ( $N$ , $I$ , $\cos \theta$ ) . . . . .         | 5         |
| 2.3 SAP detection algorithm . . . . .                                       | 7         |
| 2.3.1 Choosing a set of possible SAPs . . . . .                             | 7         |
| 2.3.2 Peaks annotation (b-, y- and additional ion series) . . . . .         | 8         |
| 2.3.3 Different methods of peaks shifting . . . . .                         | 9         |
| 2.3.4 Parameters estimation ( $C$ , $I$ , $alg$ , $\cos \theta$ ) . . . . . | 9         |
| <b>3 Algorithm exploration</b>                                              | <b>12</b> |
| 3.1 NA exploration . . . . .                                                | 12        |
| 3.2 Decoy database research . . . . .                                       | 12        |
| 3.3 Comparison with other algorithms (Byonic, pMatch, SPIDER) . . . .       | 14        |
| 3.4 73 <i>E.coli</i> differentiation study . . . . .                        | 15        |
| 3.5 Detection of point mutations . . . . .                                  | 17        |
| <b>4 SNP study</b>                                                          | <b>18</b> |
| 4.1 Angle dependence on the type of SAP . . . . .                           | 18        |
| <b>5 Software and data</b>                                                  | <b>19</b> |
| 5.1 Software and programming languages . . . . .                            | 19        |
| 5.2 Data and code availability . . . . .                                    | 19        |
| <b>6 References</b>                                                         | <b>20</b> |

# 1 Standard procedures

## 1.1 Protein database construction and spectra identification with Mascot

Raw data files with WIFF and .D file format were converted to the Mascot generic format (MGF file format) using AB SCIEX MS Data Converter version 1.3 and Compass Data Analysis 4.2 (Build 383.1) respectively. Mascot 2.2.07 was used for the identification with the following parameters: MS1 tol: 10 ppm, MS2 tol: 0.5 Da, variable modifications: Oxidation(M) and Carbamidomethylation(C), trypsin specificity with 1 missed cleavages allowed. Decoy searches were implemented by database construction with reversed proteins.

## 1.2 Sequence assignment and spectral library construction

The spectral libraries were constructed from Mascot identification results excluding those with predicted post-translational modifications. The threshold values were estimated for  $FDR \leq 0.05$ . Each spectral library represents a file in MGF format with an additional SEQ field, which contains an amino acid sequence of the peptide identified. The resulting library sizes for each strain are shown in Table S-2:

**Table S-1 Spectral library sizes.**

| Strain                       | NCBI accession | Spectral library size |
|------------------------------|----------------|-----------------------|
| <i>H. pylori</i> A45         | AMYU000000000  | 13657                 |
| <i>H. pylori</i> 26695       | NC_018939      | 13306                 |
| <i>H. pylori</i> J99         | NC_000921      | 13789                 |
| <i>H. pylori</i> E48         | AYHQ000000000  | 12440                 |
| <i>H. pylori</i> H13-1       | AYUH000000000  | 15194                 |
| <i>N. gonorrhoeae</i> i19.05 | JFBA000000000  | 29462                 |
| <i>N. gonorrhoeae</i> n01.08 | JIBZ000000000  | 32815                 |
| <i>N. gonorrhoeae</i> FA1090 | NC_002946      | 10854                 |

To construct a spectral library we used an MGF format file containing all the data of a proteomic experiment and Mascot result export file (described above). We used the *speptide* software to construct the library. The filtering according to peptide identification criteria was applied. The results of spectra identification using Mascot should be exported in CSV format file containing "Query title" and "Sequence" fields (pep\_scan\_title and pep\_seq). After the spectral library was annotated, we match ion series to MS/MS peaks using the amino acid sequence of peptides identified by Mascot. Spectra for the known genome were identified with Mascot using the genome of known organism and further used as spectral library. MS/MS peaks in the spectral library are annotated and ion series are assigned.

## 1.3 Estimation of the number of polymorphisms based on genomic data

The number of SAPs in tryptic peptides between a pair of strains was estimated using *blastp* package. For each of the comparison pair of datasets the lists with all tryptic peptides were received with *ad hoc* perl scripts (Fig. S-1). The database for *blastp* search was created from the list of peptides sequences from the first sample.

The list of sequences of the second sample were searched against created database. At the last step only peptides with the same length and differ only in one amino acid were involved in the estimation of the total number of possible SAPs identification.

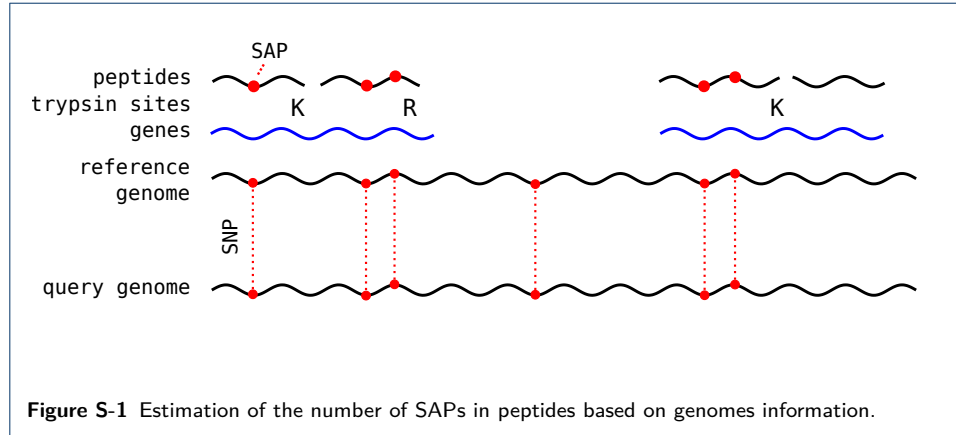

## 2 Algorithm

### 2.1 Vector representation of spectra and angle calculation

The comparison of the spectra is based on spectral angle calculation described earlier [1, 2]. A spectrum is represented by a vector in a space  $m$  with components corresponding to the intensities of the peaks of this spectrum. The estimation of similarity between two spectra is based on the calculation of the cosine similarity between the corresponding vectors.

Briefly, every spectrum is represented by two ordered sets  $\{m\}$  and  $\{i\}$ , containing  $\frac{m}{z}$  and intensities of peaks, correspondingly, and function  $I_s : \{m\} \rightarrow \{i\}$ , putting in accordance  $\frac{m}{z}$  and its intensity. Further two symbols are used for brevity: first  $\in^\delta$  ("belongs to with accuracy of  $\delta$ "),

$$x \in^\delta \{M\} \Leftrightarrow \exists m \in \{M\} : |x - m| < \delta$$

Second:  $\cup^\delta$  ("unity with accuracy of  $\delta$ "),

$$A \cup^\delta B = A' \cup B, A' = \{a\} : a \notin^\delta B$$

Comparison of the two spectra  $S_1$  ( $\{m_1\}, \{i_1\}, I_{s_1}$ ) and  $S_2$  ( $\{m_2\}, \{i_2\}, I_{s_2}$ ) is based on construction of a set  $M = \{m_1\} \cup^\delta \{m_2\}$ . For every spectrum in the set  $M$ , we define a function  $I_s^\delta(x) : M \rightarrow \{i\}$ :

$$I_{s_n}^\delta(x) = \begin{cases} I_{S_n}(m), & \text{if } \exists m \in \{m_n\} : |x - m| < \delta. \\ 0, & \text{otherwise.} \end{cases}$$

Thus, we associate the spectra compared with intensity ordered sets (vectors)  $I_{s_1}^\delta(M)$  and  $I_{s_2}^\delta(M)$ , and as measure of similarity for the two spectra, we use the

angle value between those two vectors  $\cos \Theta = \cos(I_{s_1}^\delta(M), I_{s_2}^\delta(M))$ . The higher is the cosine of the angle value, the higher is the probability that the spectra correspond to similar sequences.

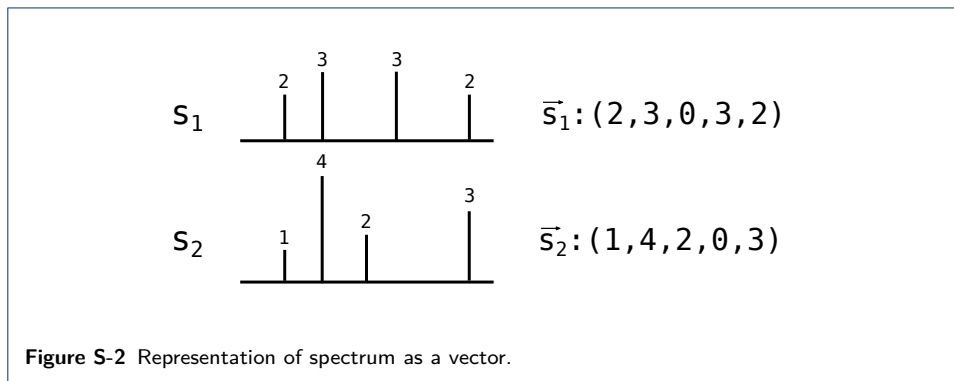

$$\cos \Theta = \frac{\vec{s}_1 \cdot \vec{s}_2}{|\vec{s}_1| \cdot |\vec{s}_2|}$$

## 2.2 Detection of identical spectra

For two spectral sets (SP and SL) with a given  $\Delta_{MS1}$  candidate pairs of spectra are defined as those with  $|MS1_{SP} - MS1_{SL}| \leq \Delta_{MS1}$ . Each spectrum in a pair is represented by a vector, and the cosine similarity is calculated. Each spectrum from SP is assigned to a spectrum from SL corresponding to the minimal angle between two vectors.

### 2.2.1 Transformation methods

The initial spectra is not always useful for calculation of spectral angle. Several approaches exist to transform the initial spectra [3]. It is known that the transformation of intensity improves the results. It was also shown that limiting the number of peaks taken into comparison can improve the comparison. For convenience the spectral intensity is normalized so that the average intensity in the spectra equals 100. The following several intensity transformations are applied:  $\sqrt{I}$ ,  $\ln I$  and untransformed intensity value  $I$ .

### 2.2.2 Parameters estimation ( $N$ , $I$ , $\cos \theta$ )

We used spectral sets from three strains of *H. pylori*: A45, J99 and 26695 as a training set for the algorithm. Three pairwise comparisons are performed; in each of them, one sample is considered as a reference sample and the other as a query sample. A45  $\rightarrow$  J99, J99  $\rightarrow$  26695, 26695  $\rightarrow$  A45 (the second sample in each pair serving as reference). Different methods of intensity transformations are applied; the number of the peaks selected for further analysis is also varied.  $\frac{m}{N}$  most intensive peaks are selected, where  $m$  is MS1 mass and  $N$  – is a parameter varying from 10 to 200. The results for each strain are verified by comparison with Mascot identifications using the protein database built from the annotation of the

corresponding genome. For each parameter values areas under ROC curves are calculated, and the number of true positive identifications is estimated for  $FDR$  not exceeding 0.05. (Table S-4).

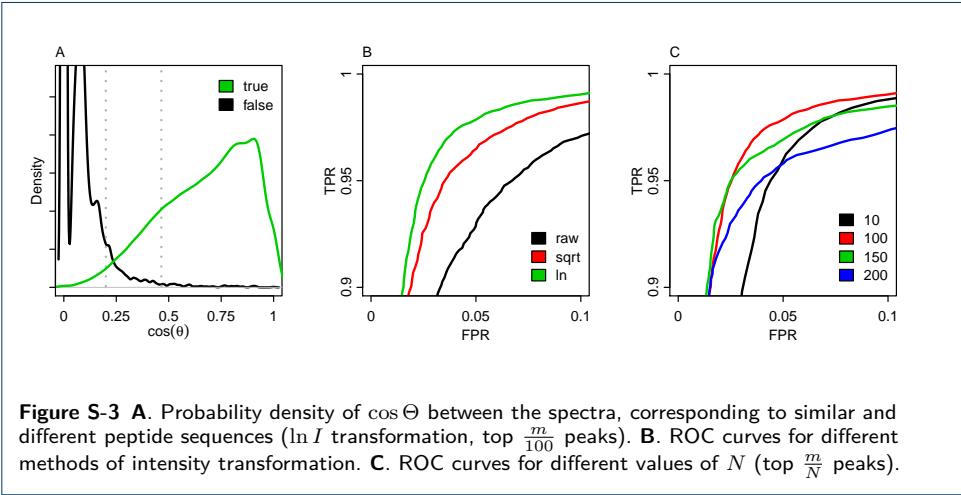

The resulting parameter and threshold  $\cos \Theta$  values are defined for 0.05 and 0.01  $FDR$ :  $\ln I$  transformation,  $N = 100$  (top  $\frac{m}{N}$  peaks),  $\cos \Theta \geq 0.31$  (0.47).

**Table S-2** Number of identified peptides with  $FDR \leq 0.05$  and area under ROC-curves for different parameters for algorithm of identical spectra identification.

| $N$ (top $\frac{m}{n}$ peaks) | Number of peptides |         |      | Area under ROC-curve |         |       |
|-------------------------------|--------------------|---------|------|----------------------|---------|-------|
|                               | $\sqrt{I}$         | $\ln I$ | $I$  | $\sqrt{I}$           | $\ln I$ | $I$   |
| 10                            | 4210               | 4210    | 4125 | 0.987                | 0.986   | 0.981 |
| 20                            | 4210               | 4215    | 4122 | 0.988                | 0.986   | 0.981 |
| 30                            | 4204               | 4210    | 4115 | 0.988                | 0.987   | 0.981 |
| 40                            | 4197               | 4213    | 4113 | 0.988                | 0.988   | 0.981 |
| 50                            | 4187               | 4206    | 4112 | 0.989                | 0.989   | 0.982 |
| 60                            | 4186               | 4210    | 4116 | 0.989                | 0.990   | 0.983 |
| 70                            | 4182               | 4214    | 4111 | 0.990                | 0.991   | 0.984 |
| 80                            | 4179               | 4209    | 4097 | 0.991                | 0.992   | 0.985 |
| 90                            | 4166               | 4199    | 4101 | 0.991                | 0.992   | 0.985 |
| 100                           | 4158               | 4198    | 4095 | 0.991                | 0.992   | 0.986 |
| 110                           | 4149               | 4196    | 4091 | 0.991                | 0.992   | 0.986 |
| 120                           | 4140               | 4191    | 4086 | 0.990                | 0.991   | 0.986 |
| 130                           | 4133               | 4179    | 4084 | 0.990                | 0.991   | 0.985 |
| 140                           | 4132               | 4177    | 4078 | 0.989                | 0.991   | 0.985 |
| 150                           | 4126               | 4171    | 4069 | 0.989                | 0.990   | 0.985 |
| 160                           | 4110               | 4169    | 4054 | 0.988                | 0.989   | 0.984 |
| 170                           | 4106               | 4158    | 4055 | 0.987                | 0.988   | 0.984 |
| 180                           | 4092               | 4144    | 4047 | 0.986                | 0.987   | 0.983 |
| 190                           | 4088               | 4137    | 4038 | 0.985                | 0.986   | 0.982 |
| 200                           | 4082               | 4130    | 4031 | 0.984                | 0.985   | 0.981 |

The resulting parameter and threshold  $\cos \Theta$  values are defined for 0.05 and 0.01  $FDR$ .

## 2.3 SAP detection algorithm

For two spectral sets (SP and SL) with a given  $\Delta_{MS1}$  candidate pairs of spectra are defined as those with  $\exists D_\delta \in \{D\} : D_\delta - \Delta_{MS1} \leq MS1_{SL} - MS1_{SP} \leq D_\delta + \Delta_{MS1}$ , where  $\{D\}$  is a set of mass differences for selected amino acid substitutions. A spectrum from SL is transformed according to the chosen method. Each spectrum in a pair is represented by a vector, and the cosine similarity is calculated. Each spectrum from SP is assigned to a spectrum from SL corresponding to the minimal angle between two vectors.

### 2.3.1 Choosing a set of possible SAPs

Only amino acid substitutions caused by a single nucleotide change in a codon were selected for the analysis; substitutions with  $\Delta_m \leq 1Da$  were excluded, resulting in total of 138 substitutions under consideration.

**Table S-3** SAPs selected for the analysis (the absolute value of  $\Delta_m$  is specified).

|       |         |       |         |       |          |
|-------|---------|-------|---------|-------|----------|
| K ↔ M | 2.9455  | N ↔ H | 23.0160 | L ↔ R | 43.0170  |
| P ↔ T | 3.9949  | L ↔ H | 23.9748 | I ↔ R | 43.0170  |
| Q ↔ H | 9.0003  | M ↔ R | 25.0606 | A ↔ D | 43.9898  |
| S ↔ P | 10.0207 | H ↔ Y | 26.0044 | C ↔ F | 44.0592  |
| T ↔ I | 12.0364 | A ↔ P | 26.0157 | G ↔ C | 45.9877  |
| T ↔ N | 12.9952 | S ↔ L | 26.0520 | V ↔ F | 48.0000  |
| V ↔ I | 14.0157 | S ↔ I | 26.0520 | D ↔ Y | 48.0364  |
| V ↔ L | 14.0157 | S ↔ N | 27.0109 | N ↔ Y | 49.0204  |
| D ↔ E | 14.0157 | T ↔ K | 27.0473 | C ↔ R | 53.0919  |
| G ↔ A | 14.0157 | K ↔ R | 28.0061 | T ↔ R | 55.0534  |
| S ↔ T | 14.0157 | A ↔ V | 28.0313 | A ↔ E | 58.0055  |
| N ↔ K | 14.0520 | Q ↔ R | 28.0425 | G ↔ D | 58.0055  |
| L ↔ Q | 14.9745 | V ↔ E | 29.9742 | P ↔ R | 59.0483  |
| I ↔ K | 15.0109 | R ↔ W | 29.9782 | S ↔ F | 60.0364  |
| V ↔ D | 15.9585 | T ↔ M | 29.9928 | C ↔ Y | 60.0541  |
| S ↔ C | 15.9772 | G ↔ S | 30.0106 | S ↔ R | 69.0691  |
| F ↔ Y | 15.9949 | A ↔ T | 30.0106 | G ↔ E | 72.0211  |
| A ↔ S | 15.9949 | P ↔ Q | 31.0058 | L ↔ W | 72.9952  |
| P ↔ L | 16.0313 | V ↔ M | 31.9721 | S ↔ Y | 76.0313  |
| L ↔ M | 17.9564 | L ↔ F | 33.9844 | C ↔ W | 83.0701  |
| I ↔ M | 17.9564 | I ↔ F | 33.9844 | S ↔ W | 99.0473  |
| H ↔ R | 19.0422 | P ↔ H | 40.0061 | G ↔ R | 99.0796  |
| D ↔ H | 22.0320 | G ↔ V | 42.0470 | G ↔ W | 129.0578 |

### 2.3.2 Peaks annotation (b-, y- and additional ion series)

For SAP identification, peaks in a spectral library are annotated. Their intersection with theoretical peaks of peptide sequence with a given  $\Delta$  ( $\Delta = 0.5$  Da in current study) is constructed. Different ion types were considered,  $b-$ ,  $y-$ ,  $b-H_2O-$ ,  $b-NH_3-$ ,  $y-H_2O-$ ,  $y-NH_3-$  ions in particular. The best algorithm was selected after using different types of ions for training. After comparing the results of identifications using different approaches, only  $b-$ ,  $y-$  ions were selected for the analysis, while the others were considered as "unannotated".

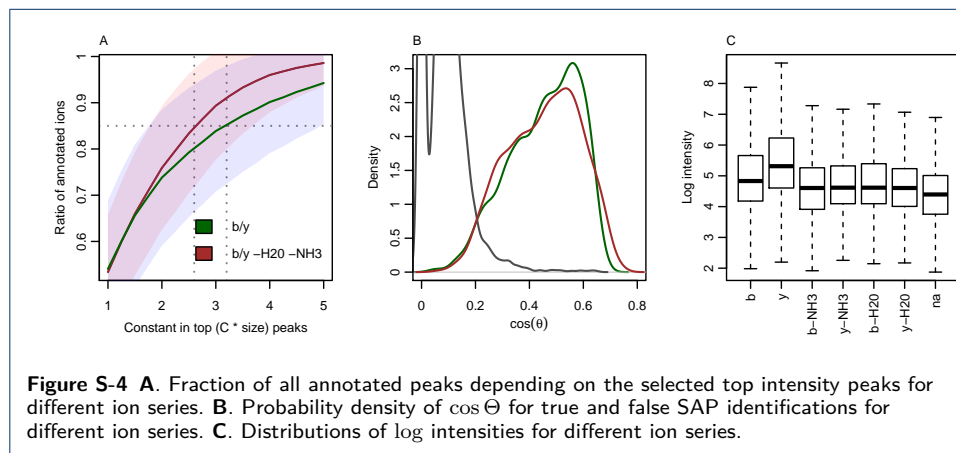

### 2.3.3 Different methods of peaks shifting

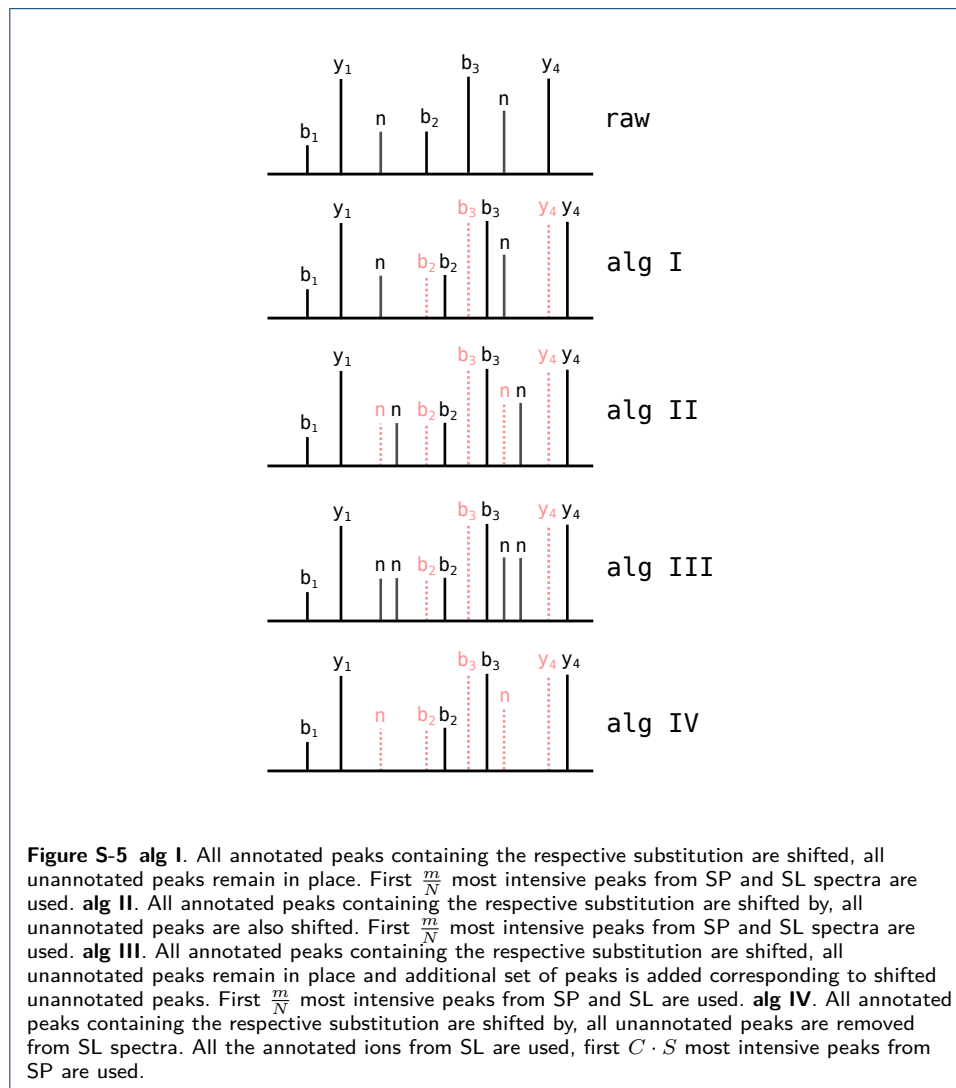

### 2.3.4 Parameters estimation ( $C, I, alg, \cos \theta$ )

We used spectral sets from three strains of *H. pylori*: A45, J99 and 26695, as a training dataset for the algorithm. Three pairwise comparisons are performed; in each of them, one sample is considered as a reference sample and the other as a query sample. A45  $\rightarrow$  J99, J99  $\rightarrow$  26695, 26695  $\rightarrow$  A45 (the second sample in each pair serving as reference). Different methods of shifting of the peaks in the reference spectrum and intensity transformation are applied; the number of the peaks from reference and query spectra selected for further analysis is also varied. In the reference spectrum,  $\frac{m}{N}$  most intensive peaks are selected, where  $m$  is MS1 mass and  $N$  – is a parameter varying from 10 to 200. The selected peaks are then annotated and shifted according to one of the methods. In the query spectrum,  $C \cdot S$  most intensive peaks are selected, where  $S$  is the number of peaks in the reference spectrum left after filtering and annotation and  $C$  is a parameter varying from 1 to

5. The results for each strain are verified by comparison with Mascot identifications using the protein database built from the annotation of the corresponding genome. For each parameter values areas under ROC curves are calculated, and the number of true positive identifications is estimated for  $FDR$  not exceeding 0.05 (Table S-6).

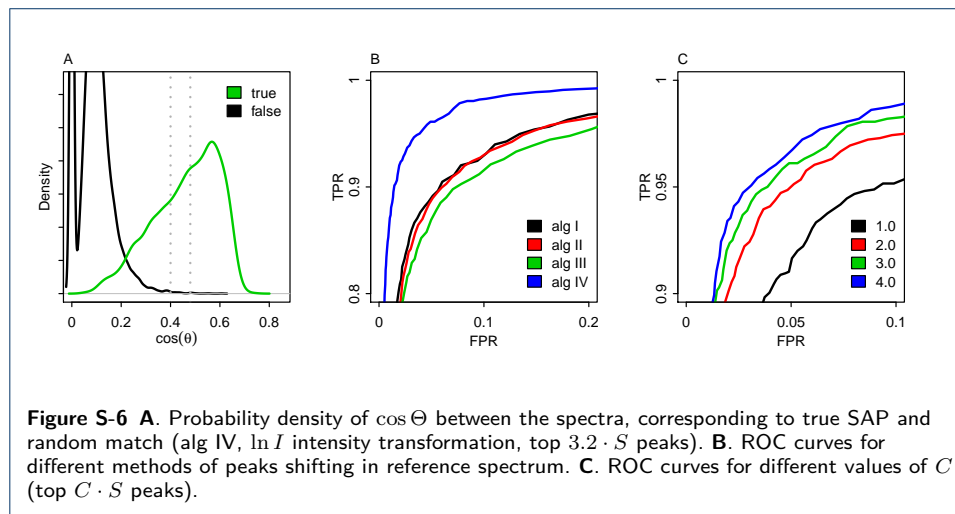

The resulting parameter and threshold  $\cos \Theta$  values are defined for 0.05 and 0.01  $FDR$ : alg IV,  $\ln I$  transformation,  $C = 3.2$  (top  $C \cdot S$  peaks),  $\cos \Theta \geq 0.40$  (0.48)

Table S-4 Number of identified peptides with  $FDR \leq 0.05$  and areas under ROC-curves for different parameters for algorithm of SAP identification.

| alg                  | alg I      |         |       |            |         | alg II |            |         |       |            | alg III |       |            |         |       | alg IV     |         |       |            |         |       |       |
|----------------------|------------|---------|-------|------------|---------|--------|------------|---------|-------|------------|---------|-------|------------|---------|-------|------------|---------|-------|------------|---------|-------|-------|
| $t_{trans}$<br>$N$   | $\sqrt{I}$ | $\ln I$ | $I$   | $\sqrt{I}$ | $\ln I$ | $I$    | $\sqrt{I}$ | $\ln I$ | $I$   | $\sqrt{I}$ | $\ln I$ | $I$   | $\sqrt{I}$ | $\ln I$ | $I$   | $\sqrt{I}$ | $\ln I$ | $I$   | $\sqrt{I}$ | $\ln I$ | $I$   |       |
|                      | 100        | 150     | 50    | 100        | 150     | 50     | 100        | 150     | 50    | 100        | 150     | 50    | 100        | 150     | 50    | 100        | 150     | 50    | 100        | 150     | 50    |       |
| Number of peptides   |            |         |       |            |         |        |            |         |       |            |         |       |            |         |       |            |         |       |            |         |       |       |
| $C$                  |            |         |       |            |         |        |            |         |       |            |         |       |            |         |       |            |         |       |            |         |       |       |
| 1.0                  | 861        | 767     | 909   | 943        | 818     | 965    | 594        | 602     | 570   | 605        | 751     | 644   | 873        | 869     | 794   | 893        | 412     | 400   | 415        | 790     | 714   | 872   |
| 1.2                  | 853        | 794     | 909   | 934        | 816     | 956    | 602        | 586     | 590   | 609        | 763     | 640   | 886        | 850     | 756   | 864        | 415     | 401   | 416        | 796     | 747   | 858   |
| 1.4                  | 861        | 802     | 891   | 946        | 844     | 939    | 586        | 534     | 534   | 605        | 775     | 630   | 860        | 788     | 714   | 881        | 416     | 413   | 413        | 790     | 729   | 851   |
| 1.6                  | 835        | 823     | 883   | 898        | 878     | 942    | 591        | 534     | 534   | 602        | 785     | 648   | 877        | 799     | 732   | 854        | 408     | 415   | 410        | 805     | 739   | 870   |
| 1.8                  | 830        | 796     | 870   | 910        | 898     | 957    | 599        | 538     | 538   | 597        | 796     | 634   | 860        | 812     | 689   | 860        | 414     | 414   | 409        | 795     | 741   | 885   |
| 2.0                  | 822        | 808     | 884   | 933        | 907     | 951    | 591        | 535     | 535   | 593        | 767     | 647   | 870        | 818     | 723   | 837        | 404     | 413   | 406        | 782     | 734   | 884   |
| 2.2                  | 835        | 807     | 888   | 952        | 928     | 920    | 585        | 536     | 536   | 588        | 742     | 657   | 873        | 800     | 727   | 844        | 399     | 407   | 404        | 768     | 730   | 881   |
| 2.4                  | 844        | 803     | 894   | 936        | 943     | 910    | 576        | 536     | 536   | 584        | 741     | 665   | 881        | 802     | 744   | 826        | 404     | 413   | 404        | 789     | 734   | 884   |
| 2.6                  | 856        | 805     | 890   | 944        | 926     | 933    | 585        | 541     | 541   | 584        | 717     | 687   | 876        | 791     | 762   | 862        | 403     | 409   | 412        | 790     | 733   | 893   |
| 2.8                  | 857        | 804     | 901   | 904        | 918     | 924    | 579        | 542     | 542   | 598        | 752     | 683   | 872        | 790     | 766   | 852        | 402     | 412   | 412        | 762     | 732   | 877   |
| 3.0                  | 837        | 783     | 897   | 889        | 915     | 926    | 583        | 541     | 538   | 598        | 741     | 691   | 867        | 787     | 779   | 844        | 405     | 407   | 411        | 794     | 729   | 878   |
| 3.2                  | 818        | 780     | 917   | 869        | 915     | 926    | 583        | 531     | 531   | 598        | 746     | 688   | 867        | 783     | 790   | 839        | 404     | 403   | 411        | 791     | 711   | 877   |
| 3.4                  | 822        | 783     | 932   | 890        | 886     | 920    | 573        | 538     | 538   | 598        | 735     | 628   | 867        | 784     | 767   | 837        | 404     | 388   | 411        | 788     | 712   | 877   |
| 3.6                  | 828        | 783     | 931   | 891        | 879     | 920    | 573        | 535     | 535   | 598        | 725     | 627   | 866        | 743     | 763   | 835        | 403     | 393   | 411        | 802     | 716   | 877   |
| 3.8                  | 833        | 784     | 931   | 868        | 877     | 920    | 578        | 535     | 535   | 598        | 716     | 608   | 866        | 725     | 738   | 833        | 402     | 390   | 411        | 813     | 719   | 877   |
| 4.0                  | 838        | 785     | 931   | 869        | 881     | 920    | 577        | 540     | 538   | 598        | 713     | 614   | 866        | 712     | 739   | 833        | 399     | 385   | 411        | 811     | 720   | 877   |
| 4.2                  | 835        | 787     | 930   | 881        | 891     | 919    | 576        | 537     | 537   | 598        | 705     | 591   | 866        | 700     | 740   | 833        | 399     | 394   | 411        | 811     | 720   | 877   |
| 4.4                  | 842        | 778     | 929   | 892        | 875     | 918    | 574        | 533     | 532   | 598        | 699     | 592   | 866        | 700     | 740   | 833        | 399     | 394   | 411        | 811     | 720   | 877   |
| 4.6                  | 852        | 782     | 930   | 883        | 895     | 918    | 574        | 532     | 532   | 598        | 695     | 580   | 866        | 693     | 723   | 833        | 398     | 392   | 411        | 811     | 722   | 877   |
| 4.8                  | 849        | 774     | 930   | 877        | 822     | 919    | 573        | 532     | 532   | 598        | 690     | 604   | 866        | 707     | 728   | 833        | 397     | 391   | 411        | 824     | 717   | 877   |
| 5.0                  | 857        | 777     | 930   | 869        | 827     | 919    | 572        | 529     | 529   | 598        | 690     | 604   | 866        | 707     | 728   | 833        | 397     | 391   | 411        | 824     | 717   | 877   |
| Area under ROC-curve |            |         |       |            |         |        |            |         |       |            |         |       |            |         |       |            |         |       |            |         |       |       |
| 1.0                  | 0.930      | 0.898   | 0.923 | 0.904      | 0.939   | 0.898  | 0.905      | 0.899   | 0.899 | 0.916      | 0.903   | 0.895 | 0.884      | 0.939   | 0.885 | 0.940      | 0.874   | 0.878 | 0.883      | 0.893   | 0.915 | 0.884 |
| 1.2                  | 0.933      | 0.889   | 0.921 | 0.910      | 0.933   | 0.902  | 0.916      | 0.875   | 0.899 | 0.918      | 0.909   | 0.888 | 0.895      | 0.878   | 0.878 | 0.862      | 0.887   | 0.891 | 0.891      | 0.909   | 0.914 | 0.894 |
| 1.4                  | 0.932      | 0.929   | 0.933 | 0.908      | 0.908   | 0.905  | 0.916      | 0.909   | 0.909 | 0.917      | 0.906   | 0.922 | 0.901      | 0.947   | 0.908 | 0.865      | 0.888   | 0.895 | 0.894      | 0.899   | 0.915 | 0.898 |
| 1.6                  | 0.933      | 0.921   | 0.935 | 0.912      | 0.894   | 0.907  | 0.872      | 0.880   | 0.890 | 0.923      | 0.908   | 0.918 | 0.908      | 0.876   | 0.888 | 0.872      | 0.890   | 0.856 | 0.899      | 0.900   | 0.921 | 0.899 |
| 1.8                  | 0.934      | 0.918   | 0.938 | 0.919      | 0.890   | 0.907  | 0.875      | 0.889   | 0.890 | 0.884      | 0.912   | 0.914 | 0.907      | 0.883   | 0.877 | 0.869      | 0.889   | 0.863 | 0.903      | 0.900   | 0.928 | 0.902 |
| 2.0                  | 0.932      | 0.909   | 0.939 | 0.914      | 0.937   | 0.894  | 0.878      | 0.890   | 0.890 | 0.885      | 0.910   | 0.899 | 0.910      | 0.881   | 0.926 | 0.866      | 0.892   | 0.862 | 0.903      | 0.898   | 0.928 | 0.901 |
| 2.2                  | 0.929      | 0.903   | 0.940 | 0.905      | 0.931   | 0.893  | 0.877      | 0.889   | 0.889 | 0.885      | 0.914   | 0.892 | 0.910      | 0.882   | 0.920 | 0.872      | 0.891   | 0.862 | 0.905      | 0.901   | 0.928 | 0.902 |
| 2.4                  | 0.927      | 0.900   | 0.942 | 0.893      | 0.932   | 0.897  | 0.875      | 0.889   | 0.888 | 0.887      | 0.907   | 0.882 | 0.918      | 0.860   | 0.917 | 0.873      | 0.894   | 0.865 | 0.905      | 0.899   | 0.921 | 0.903 |
| 2.6                  | 0.929      | 0.899   | 0.943 | 0.886      | 0.925   | 0.895  | 0.876      | 0.888   | 0.888 | 0.887      | 0.905   | 0.880 | 0.917      | 0.862   | 0.928 | 0.877      | 0.897   | 0.867 | 0.906      | 0.896   | 0.917 | 0.903 |
| 2.8                  | 0.927      | 0.900   | 0.942 | 0.883      | 0.926   | 0.895  | 0.876      | 0.889   | 0.889 | 0.888      | 0.899   | 0.878 | 0.921      | 0.856   | 0.914 | 0.877      | 0.900   | 0.869 | 0.907      | 0.894   | 0.911 | 0.904 |
| 3.0                  | 0.924      | 0.898   | 0.941 | 0.945      | 0.920   | 0.891  | 0.879      | 0.890   | 0.890 | 0.887      | 0.898   | 0.881 | 0.920      | 0.849   | 0.896 | 0.903      | 0.897   | 0.871 | 0.907      | 0.891   | 0.911 | 0.904 |
| 3.2                  | 0.921      | 0.896   | 0.941 | 0.941      | 0.920   | 0.891  | 0.879      | 0.890   | 0.890 | 0.887      | 0.898   | 0.881 | 0.920      | 0.849   | 0.896 | 0.875      | 0.897   | 0.871 | 0.907      | 0.889   | 0.903 | 0.903 |
| 3.4                  | 0.917      | 0.891   | 0.941 | 0.934      | 0.910   | 0.891  | 0.881      | 0.887   | 0.887 | 0.888      | 0.894   | 0.877 | 0.919      | 0.849   | 0.898 | 0.875      | 0.898   | 0.870 | 0.907      | 0.889   | 0.903 | 0.903 |
| 3.6                  | 0.918      | 0.887   | 0.941 | 0.930      | 0.902   | 0.890  | 0.880      | 0.887   | 0.887 | 0.888      | 0.898   | 0.874 | 0.920      | 0.941   | 0.888 | 0.876      | 0.900   | 0.870 | 0.907      | 0.888   | 0.899 | 0.903 |
| 3.8                  | 0.918      | 0.882   | 0.942 | 0.925      | 0.901   | 0.889  | 0.879      | 0.887   | 0.887 | 0.888      | 0.898   | 0.874 | 0.921      | 0.939   | 0.893 | 0.875      | 0.903   | 0.868 | 0.907      | 0.889   | 0.900 | 0.903 |
| 4.0                  | 0.914      | 0.882   | 0.942 | 0.920      | 0.896   | 0.890  | 0.878      | 0.887   | 0.887 | 0.888      | 0.896   | 0.871 | 0.921      | 0.942   | 0.889 | 0.877      | 0.902   | 0.868 | 0.908      | 0.889   | 0.896 | 0.903 |
| 4.2                  | 0.912      | 0.882   | 0.942 | 0.920      | 0.896   | 0.890  | 0.877      | 0.888   | 0.888 | 0.889      | 0.896   | 0.870 | 0.921      | 0.941   | 0.885 | 0.875      | 0.901   | 0.869 | 0.908      | 0.889   | 0.896 | 0.903 |
| 4.4                  | 0.910      | 0.938   | 0.941 | 0.920      | 0.896   | 0.890  | 0.877      | 0.888   | 0.888 | 0.888      | 0.894   | 0.871 | 0.920      | 0.942   | 0.885 | 0.875      | 0.901   | 0.870 | 0.908      | 0.889   | 0.898 | 0.903 |
| 4.6                  | 0.908      | 0.936   | 0.942 | 0.922      | 0.893   | 0.889  | 0.878      | 0.889   | 0.889 | 0.888      | 0.896   | 0.866 | 0.921      | 0.941   | 0.879 | 0.875      | 0.902   | 0.868 | 0.908      | 0.889   | 0.897 | 0.903 |
| 4.8                  | 0.910      | 0.931   | 0.942 | 0.924      | 0.891   | 0.889  | 0.878      | 0.885   | 0.885 | 0.888      | 0.897   | 0.866 | 0.921      | 0.941   | 0.879 | 0.875      | 0.901   | 0.870 | 0.908      | 0.889   | 0.897 | 0.903 |
| 5.0                  | 0.910      | 0.930   | 0.942 | 0.922      | 0.887   | 0.889  | 0.878      | 0.883   | 0.883 | 0.888      | 0.897   | 0.933 | 0.921      | 0.939   | 0.880 | 0.875      | 0.901   | 0.870 | 0.908      | 0.887   | 0.897 | 0.903 |

### 3 Algorithm exploration

#### 3.1 NA exploration

Spectra identified with *speptide* but not identified with Mascot using genome-derived database are called NA (information not available) spectra. Indirect verification of the identification results included search for homology between peptides in reference and query strains using *blast* and estimation of the number of SAPs in homologous peptides. Only those reference peptides were used for the alignment, for which SAPs in query peptides were identified but not confirmed with Mascot. In each search, a genome-derived blast database was constructed using *makeblastdb* tool and the reference peptides were then aligned with *tblastn* (60% identity) against this database. Hamming distance was employed to estimate the number of amino acid variations in homologous peptides. The results are shown in Fig. S-7.

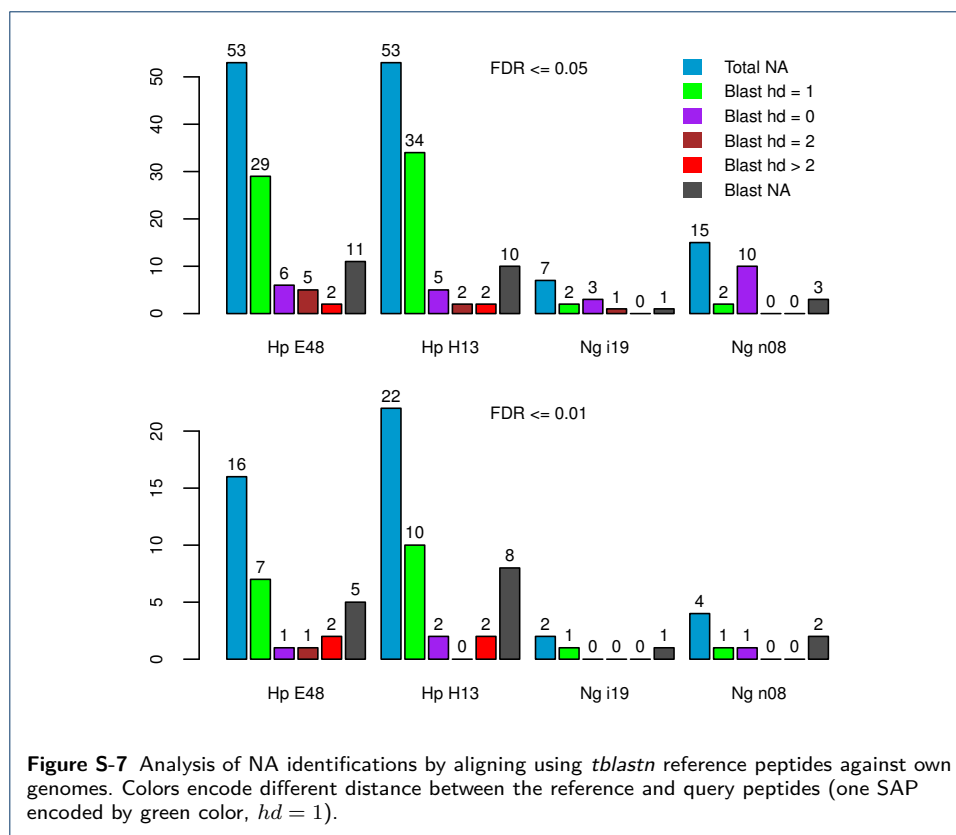

#### 3.2 Decoy database research

With a purpose to introduce an additional *FDR* estimation we explored different ways of constructing decoy spectral libraries. We used well-known approaches: shift  $\frac{m}{z}$  values for all MS1 peaks [4] (+20 Th), shift  $\frac{m}{z}$  values of all MS2 peaks in each spectrum (+20 Th)[5]. In addition, we have considered constructing decoy spectral library database from the spectra of different bacterial species, putting them under one of the following additional conditions: (1) equal number of peptides in the decoy and direct spectral libraries or (2) equal number of of spectrum-peptide pairs

(difference in MS1  $m$  values falling into the set of amino acid deltas) for direct and decoy searches. The results are presented at Fig. S-8:

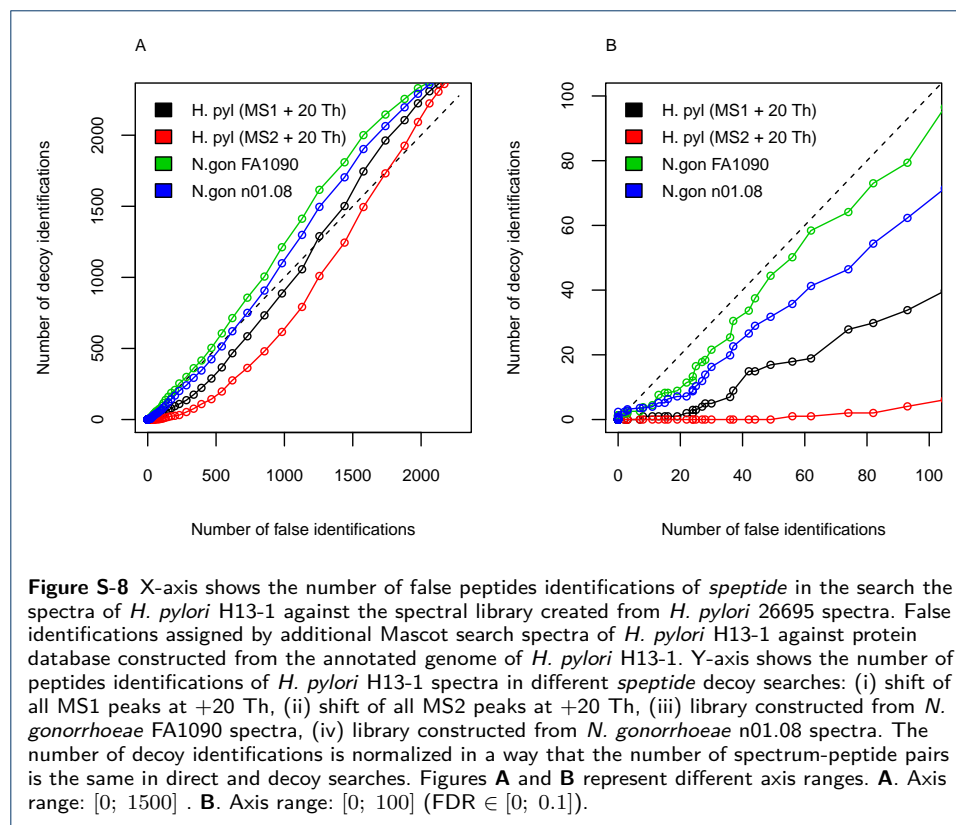

### 3.3 Comparison with other algorithms (Byonic, pMatch, SPIDER)

*Speptide* was compared with three packages: Byonic[7], pMatch[8] and SPIDER[9]. Two of them (Byonic and pMatch) are not designed for direct search of amino acid substitutions, so their results required some post-processing in order to choose only those identifications that could be a result of an amino acid substitution according to their  $\Delta_{MS1}$ . *H. pylori* E48 spectra were used as a query sample. The triple *H. pylori* database (A45, J99, 26695) including all identified peptides was used as a peptide database for *speptide*. The results from all four algorithms were compared with *H. pylori* E48 spectra genome-based identification with Mascot. The running parameters are listed below:

**Byonic v.2.5.6.** Precursor tolerance: 10 ppm, Fragment tolerance: 0.5 Da, Cleavage site(s): RK, Digestion specificity: Fully specific, Wildcard search, Total common max: 1, Minimum mass: -130, Maximum mass: 130. **pMatch v.1.5.0.1.** Precursor Tolerance: 20, M/Z Tolerance: 0.5, Shift Threshold: 3.0, Theta: 0.2. **PTM search + SPIDER (PeakStudio v7.0).** Parent Mass Tolerance: 10 ppm, Maximum allowed PTM: 1, Fragment ion tolerance: 0.5 Da, De novo score greater than: 50%, Peptide score less than: 15.

The results were filtered in order to fit  $FDR \leq 0.05$ .

**Table S-5** Time usage for different algorithms (CPU 2.13GHz, 8Gb RAM). *H. pylori* E48 ( $64 \cdot 10^3$  spectra) vs *H. pylori* 3 strain database ( $40 \cdot 10^3$  spectra,  $11 \cdot 10^3$  peptides)

|           | Speptide | pMatch | Byonic | SPIDER |
|-----------|----------|--------|--------|--------|
| CPU time: | ~10 min  | ~5 min | ~3 hrs | ~1 hr  |

### 3.4 73 *E.coli* differentiation study

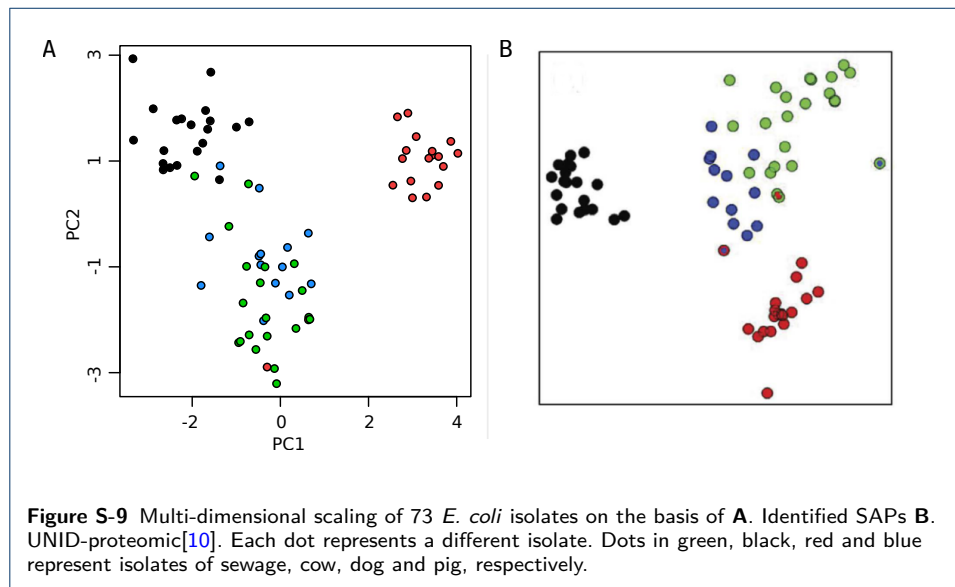

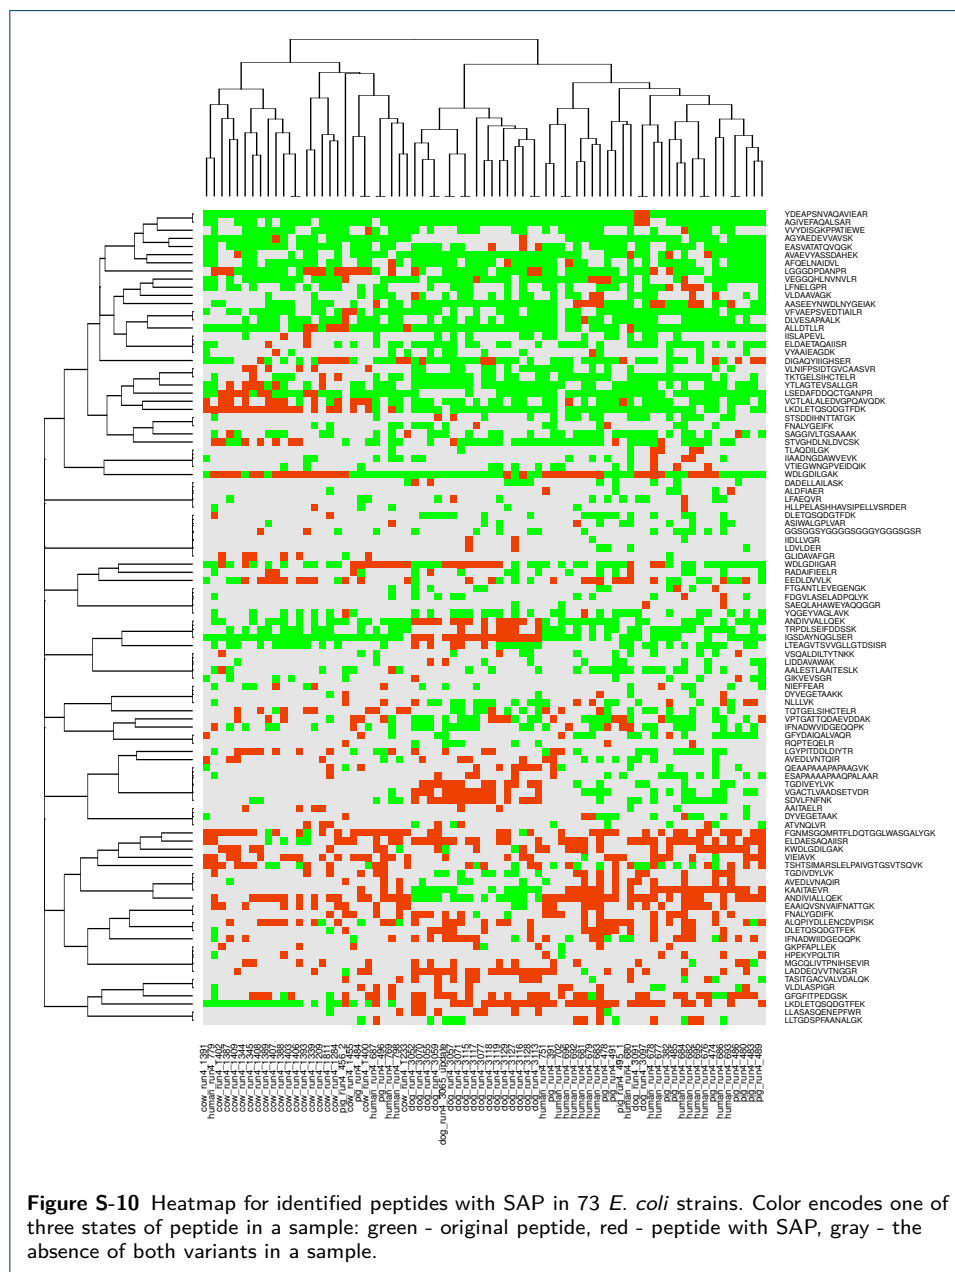

**Figure S-10** Heatmap for identified peptides with SAP in 73 *E. coli* strains. Color encodes one of three states of peptide in a sample: green - original peptide, red - peptide with SAP, gray - the absence of both variants in a sample.

### 3.5 Detection of point mutations

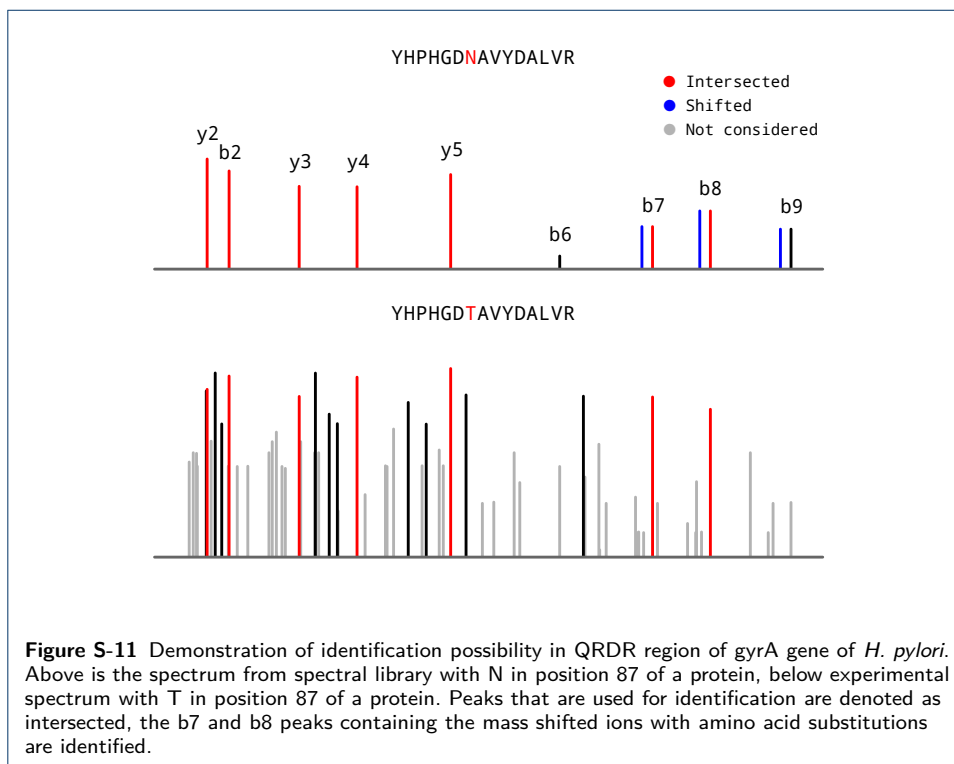

## 4 SNP study

### 4.1 Angle dependence on the type of SAP

We calculated the angle dependence on the SAP type and further performed a *t*-test to identify statistically significant differences between the different amino acid substitutions. Only amino acid substitutions with at least 100 spectral pairs assigned were selected. Final *p*-values were adjusted with Benjamini-Hochberg correction.

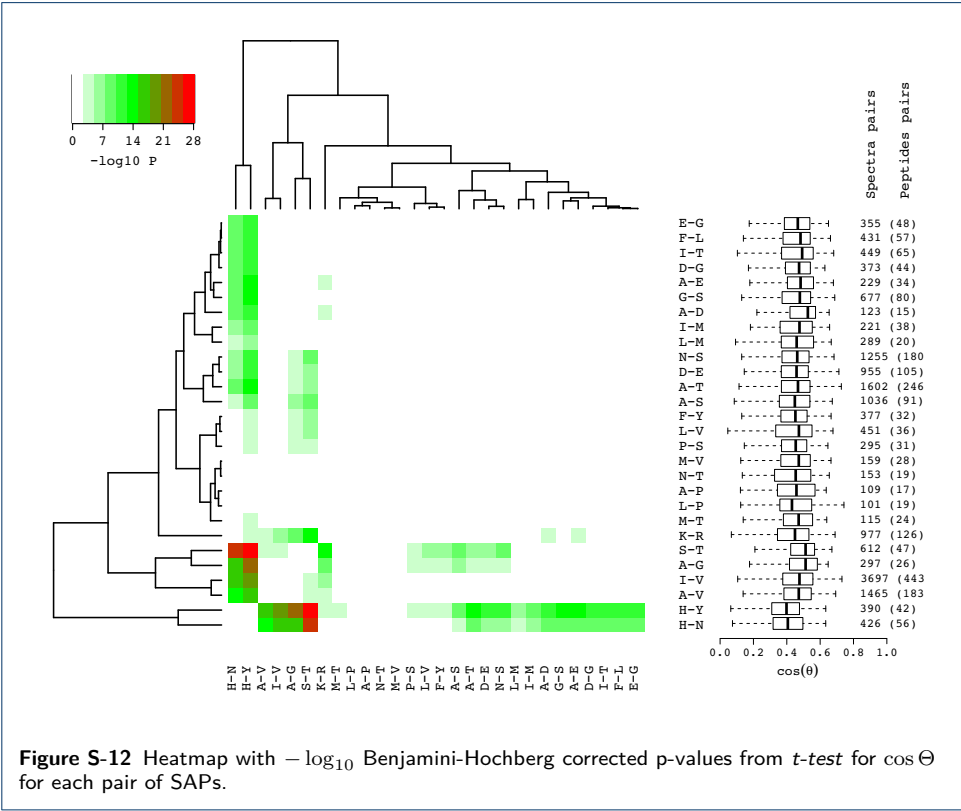

## 5 Software and data

### 5.1 Software and programming languages

- AB SCIEX MS Data Converter version 1.3 and Compass Data Analysis 4.2 : spectra conversion.
- Newbler 2.6 : read assembly.
- Mascot 2.2.07 : spectra identification.
- Blast 2.2.30 : peptides homology search and estimation of possible number of SAPs detection.
- Artemis (Version 16) : ORF search in genomes.
- R 3.2.1 : *ad hoc* scripts for data analysis.
- perl : *ad hoc* scripts and utilites for batch analysis and MGF preparation.
- C/C++ : *speptide* source code.
- Byonic 2.5.6, PeakStudio 7.0 and pMatch v.1.5.0.1: comparsion with *speptide*.

### 5.2 Data and code availability

The genomic data was deposited to NCBI either as WGS or as SRA submission. The proteomic data (including FASTA used for Mascot search) is available in [PRIDE](#) under accession: PXD001481 (Reviewer account details: Username: reviewer50451@ebi.ac.uk; Password: aR3585SN).

Algorithm was implemented as an *ad hoc* software program *speptide* written in C/C++ available with comprehensive manual and examples at: <https://github.com/dimaischenko/speptide>

## 6 References

### Author details

<sup>1</sup> Research Institute of Physical Chemical Medicine, Malaya Pirogovskaya, 1a, 119435 Moscow, Russian Federation.

<sup>2</sup> Moscow Institute of Physics and Technology, Institutskiy pereulok, 9, 141700, Dolgoprudny, Russian Federation. <sup>3</sup> Scientific Research Institute of Gastroenterology, Shosse Entuziastov, 86, 111123 Moscow, Russian Federation.

### References

1. Frank, Ari M., et al. "Spectral archives: extending spectral libraries to analyze both identified and unidentified spectra." *Nature methods* 8.7 (2011): 587-591.
2. Wan, Katty X., Ilan Vidavsky, and Michael L. Gross. "Comparing similar spectra: from similarity index to spectral contrast angle." *Journal of the American Society for Mass Spectrometry* 13.1 (2002): 85-88.
3. Liu, Jian, et al. "Methods for peptide identification by spectral comparison." *Proteome Science* 5.1 (2007): 3.
4. Elias, Joshua E., and Steven P. Gygi. "Target-decoy search strategy for increased confidence in large-scale protein identifications by mass spectrometry." *Nature methods* 4.3 (2007): 207-214.
5. Lam, Henry, Eric W. Deutsch, and Ruedi Aebersold. "Artificial decoy spectral libraries for false discovery rate estimation in spectral library searching in proteomics." *Journal of proteome research* 9.1 (2009): 605-610.
6. Gupta, Nitin, et al. "Whole proteome analysis of post-translational modifications: applications of mass-spectrometry for proteogenomic annotation." *Genome research* 17.9 (2007): 1362-1377.
7. Bern, Marshall, Yong J. Kil, and Christopher Becker. "Byonic: advanced peptide and protein identification software." *Current Protocols in Bioinformatics* (2012): 13-20.
8. Ye, Ding, et al. "Open MS/MS spectral library search to identify unanticipated post-translational modifications and increase spectral identification rate." *Bioinformatics* 26.12 (2010): i399-i406.
9. Yuen, Denis. "SPIDER: reconstructive protein homology search with de novo sequencing tags." (2011).
10. Shao, Wenguang, et al. "A peptide identification-free, genome sequence-independent shotgun proteomics workflow for strain-level bacterial differentiation." *Scientific reports* 5 (2015).
