# Supplementary material for: Large scale analysis of amino acid substitutions in bacterial proteomics
Source: BMC Bioinformatics. 2016 Nov 8;17:450. doi: 10.1186/s12859-016-1301-5 (PMC5100282; doi:10.1186/s12859-016-1301-5)
Supplement: Supplementary file 2 — Table with identifications of MS/MS spectra of H. pylori E48 and H-13 in classical Mascot search against sequence database and speptide search. (XLSX 89.6 kb) [file 12859_2016_1301_MOESM2_ESM.xlsx]

## Sheet: e48_h13_db_new_clust_spectide
MASCOT AGAINST (A45, J99, 26695) STRAINS PEPTIDES	SPEPTIDE PEPTIDES (0.05)	SPEPTIDE PEPTIDES (0.01)	GI	ACCESSION	PROT_DESC	STRAIN
99	4	3	GI:409894356 ~ GI:443620333 ~ GI:4155718	26695|1193| ~ A45|374| ~ J99|1129|	Bifunctional_DNA-directed_RNA_polymerase_subunit_beta-beta'	E48
6	0	0	GI:409893689 ~ GI:4155007	26695|524| ~ J99|488|	Type_IV_secretion_system_protein_virB10	E48
7	0	0	NA ~ GI:443621500 ~ GI:4155390	26695|882| ~ A45|1523| ~ J99|832|	Vacuolating_cytotoxin_autotransporter_precursor	E48
2	0	0	GI:409894682 ~ GI:443620681 ~ GI:4156028	26695|1505| ~ A45|708| ~ J99|1416|	Type_IIS_restriction_enzyme_Eco57I	E48
8	0	0	GI:409894312 ~ GI:443620315 ~ GI:4155681	26695|1154| ~ A45|358| ~ J99|1092|	Helicobacter_outer_membrane_protein	E48
5	0	0	GI:409894623 ~ GI:443620622 ~ GI:4155965	26695|1450| ~ A45|648| ~ J99|1361|	DNA_polymerase_III_subunit_alpha	E48
18	8	8	GI:409893710 ~ GI:4155035	26695|544| ~ J99|506|	CAG_pathogenicity_island_protein_26	E48
35	3	3	GI:409893216 ~ GI:443621131 ~ GI:4154555	26695|53| ~ A45|1155| ~ J99|49|	1-pyrroline-5-carboxylate_dehydrogenase_1 ~ 1-pyrroline-5-carboxylate_dehydrogenase	E48
17	0	0	GI:409894073 ~ GI:443621529 ~ GI:4155424	26695|915| ~ A45|1550| ~ J99|864|	Carbamoyl-phosphate_synthase_large_chain	E48
1	0	0	GI:409894489 ~ GI:443620601 ~ GI:4155849	26695|1322| ~ A45|629| ~ J99|1255|	Cation_efflux_system_protein_CusA	E48
16	0	0	GI:409893771 ~ GI:443621395 ~ GI:4155092	26695|606| ~ A45|1424| ~ J99|567|	Multidrug_transporter_MdtC	E48
5	0	0	GI:409894123 ~ GI:443620425 ~ GI:4155474	26695|964| ~ A45|464| ~ J99|915|	Cation_efflux_system_protein_CzcA	E48
1	0	0	GI:409893999 ~ GI:443621163 ~ GI:4155340	26695|843| ~ A45|1186| ~ J99|797|	Type_I_restriction_enzyme_EcoR124II_R_protein	E48
1	0	0	GI:409893754 ~ GI:443621411	26695|590| ~ A45|1439|	type_III_restriction-modification_system_StyLTI_enzyme_res	E48
6	0	0	GI:409893706 ~ GI:4155026	26695|540| ~ J99|503|	Type_IV_secretion_system_protein_virB4	E48
7	2	0	GI:409893748 ~ GI:443621417 ~ GI:4155081	26695|584| ~ A45|1445| ~ J99|547|	putative_protein_involved_in_outer_membrane_biogenesis ~ hypothetical_protein	E48
19	2	2	GI:409894203 ~ GI:443620861 ~ GI:4154899	26695|1047| ~ A45|892| ~ J99|387|	Translation_initiation_factor_IF-2	E48
3	0	0	GI:409894718 ~ GI:443620765 ~ GI:4156072	26695|1540| ~ A45|794| ~ J99|1456|	ATP-dependent_helicase/nuclease_subunit_A	E48
3	0	0	GI:409894379 ~ GI:443620361 ~ GI:4155750	26695|1216| ~ A45|399| ~ J99|1151|	putative_FAD-linked_oxidoreductase ~ glycolate_oxidase_subunit_GlcD	E48
9	0	0	GI:409893541 ~ GI:443620454 ~ GI:4155589	26695|370| ~ A45|488| ~ J99|1012|	Cytochrome_c_biogenesis_protein_CcsA	E48
16	3	2	GI:409894584 ~ GI:443620053 ~ GI:4155922	26695|1414| ~ A45|117| ~ J99|1327|	Isoleucine--tRNA_ligase	E48
5	0	0	GI:409894633 ~ GI:443620633 ~ GI:4155975	26695|1460| ~ A45|658| ~ J99|1371|	DNA_polymerase_I,_thermostable ~ DNA_polymerase_I	E48
15	1	1	GI:409893818 ~ GI:443621347 ~ GI:4155152	26695|655| ~ A45|1373| ~ J99|613|	Outer_membrane_protein_Omp85	E48
33	4	3	GI:409894677 ~ GI:443620677 ~ GI:4156026	26695|1501| ~ A45|703| ~ J99|1412|	Brucella_heme_uptake_protein_A	E48
3	1	0	GI:409894308 ~ GI:443620319 ~ GI:4155674	26695|1150| ~ A45|362| ~ J99|1088|	Valine--tRNA_ligase	E48
28	1	1	GI:409893939 ~ GI:443621223 ~ GI:4155279	26695|782| ~ A45|1244| ~ J99|736|	preprotein_translocase_subunit_SecA	E48
3	0	0	GI:409894245 ~ GI:443620904 ~ GI:4154862	26695|1088| ~ A45|933| ~ J99|346|	Stage_III_sporulation_protein_E	E48
26	2	0	GI:409893430 ~ GI:443620135 ~ GI:4154766	26695|259| ~ A45|191| ~ J99|257|	Chaperone_protein_ClpB	E48
38	0	0	GI:409893933 ~ GI:443621229 ~ GI:4155281	26695|776| ~ A45|1250| ~ J99|730|	Aconitate_hydratase_2	E48
15	0	0	GI:409894426 ~ GI:443620534 ~ GI:4155777	26695|1260| ~ A45|562| ~ J99|1195|	NADP-reducing_hydrogenase_subunit_HndC	E48
15	3	1	GI:409894397 ~ GI:443620380 ~ GI:4155760	26695|1234| ~ A45|417| ~ J99|1170|	Alanine--tRNA_ligase	E48
2	0	0	GI:409894643 ~ GI:443620643 ~ GI:4155999	26695|1469| ~ A45|667| ~ J99|1380|	putative_PEP-CTERM_system_TPR-repeat_lipoprotein	E48
11	1	1	GI:409894564 ~ GI:443620734 ~ GI:4156048	26695|1393| ~ A45|763| ~ J99|1435|	Iron(III)_dicitrate_transport_protein_FecA	E48
22	2	1	GI:409894541 ~ GI:443620217 ~ GI:4155905	26695|1372| ~ A45|267| ~ J99|1301|	Lon_protease	E48
10	2	2	GI:409893860 ~ GI:443621307 ~ GI:4155194	26695|700| ~ A45|1331| ~ J99|655|	DNA_gyrase_subunit_A	E48
11	2	2	GI:409893461 ~ GI:443620962 ~ GI:4154805	26695|290| ~ A45|991| ~ J99|288|	Hook-filament_junction_protein	E48
24	0	0	GI:409893555 ~ GI:443620469 ~ GI:4155570	26695|384| ~ A45|502| ~ J99|998|	Chemotaxis_protein_CheA	E48
3	0	0	GI:4155422	J99|862|	Brucella_heme_uptake_protein_A	E48
20	0	0	GI:409893283 ~ GI:443621064 ~ GI:4154619	26695|118| ~ A45|1089| ~ J99|117|	Phosphoenolpyruvate_synthase	E48
1	0	0	GI:409893226 ~ GI:4154569	26695|64| ~ J99|64|	DNA_translocase_FtsK ~ Septum-associated_FtsK-like_translocase_of_DNA	E48
7	1	1	GI:409894712 ~ GI:443620759 ~ GI:4156066	26695|1534| ~ A45|788| ~ J99|1462|	Leucine--tRNA_ligase	E48
2	0	0	GI:409894434 ~ GI:443620542 ~ GI:4155785	26695|1268| ~ A45|570| ~ J99|1203|	tol-pal_system_protein_YbgF	E48
18	0	0	GI:409893960 ~ GI:443621203 ~ GI:4155299	26695|803| ~ A45|1224| ~ J99|756|	Iron(III)_dicitrate_transport_protein_FecA	E48
15	2	2	GI:409893840 ~ GI:443621326 ~ GI:4155174	26695|679| ~ A45|1350| ~ J99|635|	Ribonucleoside-diphosphate_reductase_1_subunit_alpha	E48
1	0	0	GI:443620423	A45|460|	GTP-binding_protein_Der	E48
10	1	1	GI:409893929 ~ GI:443621233 ~ GI:4155268	26695|772| ~ A45|1254| ~ J99|726|	Bifunctional_(p)ppGpp_synthase/hydrolase_RelA	E48
16	0	0	GI:409893662 ~ GI:4154989	26695|498| ~ J99|465|	DNA_gyrase_subunit_B	E48
16	1	1	GI:409893565 ~ GI:443620479 ~ GI:4155564	26695|394| ~ A45|512| ~ J99|988|	Phenylalanine--tRNA_ligase_beta_subunit	E48
9	1	1	GI:409894616 ~ GI:409893536 ~ GI:443620449 ~ GI:443620699 ~ GI:4155594 ~ GI:4155958	26695|1443| ~ 26695|365| ~ A45|483| ~ A45|728| ~ J99|1017| ~ J99|1354|	Helicobacter_outer_membrane_protein	E48
5	0	0	GI:409893685 ~ GI:4155016	26695|521| ~ J99|485|	Conjugal_transfer_protein_TraG	E48
4	0	0	GI:409894227 ~ GI:443620885 ~ GI:4154885	26695|1070| ~ A45|915| ~ J99|364|	Copper-exporting_P-type_ATPase_A	E48
20	0	0	GI:409894401 ~ GI:409893484 ~ GI:409894049 ~ GI:443621507 ~ GI:443620382 ~ GI:4155775 ~ GI:4155400	26695|1236| ~ 26695|311| ~ 26695|891| ~ A45|1529| ~ A45|419| ~ J99|1172| ~ J99|844|	Helicobacter_outer_membrane_protein	E48
4	0	0	GI:409893278 ~ GI:443621067 ~ GI:4154624	26695|113| ~ A45|1092| ~ J99|114|	DNA_topoisomerase_1	E48
17	0	0	GI:409894023 ~ GI:443620159 ~ GI:4155354	26695|867| ~ A45|215| ~ J99|817|	Flagellar_hook_protein_FlgE	E48
18	1	1	GI:409893354 ~ GI:443620995 ~ GI:4154697	26695|187| ~ A45|1021| ~ J99|184|	Fumarate_reductase_flavoprotein_subunit	E48
3	0	0	GI:409893186 ~ GI:4154526	26695|21| ~ J99|21|	Helicobacter_outer_membrane_protein	E48
3	1	1	GI:409894126 ~ GI:443620428 ~ GI:4155477	26695|967| ~ A45|467| ~ J99|918|	Glycine--tRNA_ligase_beta_subunit	E48
9	3	2	GI:409893868 ~ GI:443621298 ~ GI:4155201 ~ GI:4155432	26695|708| ~ A45|1322| ~ J99|663| ~ J99|882|	Helicobacter_outer_membrane_protein	E48
13	1	1	GI:409894311 ~ GI:443620316 ~ GI:4155680	26695|1153| ~ A45|359| ~ J99|1091|	Helicobacter_outer_membrane_protein	E48
7	4	2	NA	26695|1335| ~ 26695|223| ~ J99|1267| ~ J99|220|	Helicobacter_outer_membrane_protein	E48
34	1	1	GI:409894353 ~ GI:443620330 ~ GI:4155707	26695|1190| ~ A45|371| ~ J99|1126|	Elongation_factor_G	E48
26	1	1	GI:409894590 ~ GI:443620059 ~ GI:4155934	26695|1422| ~ A45|125| ~ J99|1333|	Ribonuclease_J_1	E48
2	0	0	GI:409894324 ~ GI:443620304 ~ GI:4155693	26695|1165| ~ A45|347| ~ J99|1103|	Carbon_starvation_protein_A	E48
12	3	1	GI:409894372 ~ GI:443620350 ~ GI:4155738	26695|1208| ~ A45|390| ~ J99|1144|	Polyribonucleotide_nucleotidyltransferase	E48
17	0	0	GI:409893944 ~ GI:443621219 ~ GI:4155291	26695|787| ~ A45|1240| ~ J99|740|	Cadmium,_zinc_and_cobalt-transporting_ATPase	E48
19	3	2	GI:409893907 ~ GI:443621254 ~ GI:4155243	26695|750| ~ A45|1279| ~ J99|704|	Flagellar_cap_protein	E48
1	0	0	GI:409893792 ~ GI:443621373 ~ GI:4155124	26695|629| ~ A45|1403| ~ J99|586|	hypothetical_protein	E48
2	0	0	GI:409894642 ~ GI:443620642 ~ GI:4155998	26695|1468| ~ A45|666| ~ J99|1379|	ATP-dependent_DNA_helicase_PcrA	E48
7	0	0	GI:409893249 ~ GI:443621096 ~ GI:4154591	26695|85| ~ A45|1120| ~ J99|84|	Sigma-A ~ RNA_polymerase_sigma_factor_RpoD	E48
1	0	0	GI:409894151 ~ GI:443620730 ~ GI:4155520	26695|992| ~ A45|759| ~ J99|955|	hypothetical_protein ~ Relaxase/Mobilisation_nuclease_domain_protein	E48
1	0	0	GI:409893601	26695|432|	DNA_topoisomerase_1	E48
5	0	0	GI:409894165 ~ GI:443620824 ~ GI:4154945	26695|1009| ~ A45|855| ~ J99|423|	Polyphosphate_kinase	E48
27	6	4	GI:409893260 ~ GI:443621085 ~ GI:4154599	26695|96| ~ A45|1109| ~ J99|97|	Methyl-accepting_chemotaxis_protein_4	E48
15	0	0	GI:409893243 ~ GI:443621103 ~ GI:4154575	26695|79| ~ A45|1126| ~ J99|78|	Chemotaxis_regulator_BdlA	E48
21	1	0	GI:409894200 ~ GI:443620858	26695|1044| ~ A45|889|	Acetyl-coenzyme_A_synthetase	E48
6	0	0	GI:409893760 ~ GI:443621405 ~ GI:4155095	26695|595| ~ A45|1434| ~ J99|557|	Penicillin-binding_protein_1A ~ Penicillin-binding_protein_F	E48
3	0	0	GI:409894268 ~ GI:443620245 ~ GI:4155631	26695|1111| ~ A45|292| ~ J99|1049|	Excinuclease_ABC_subunit_B	E48
9	2	2	GI:409893777 ~ GI:443621388 ~ GI:4155109	26695|614| ~ A45|1417| ~ J99|571|	DNA_ligase	E48
14	1	1	GI:409893582 ~ GI:443620492 ~ GI:4155547	26695|409| ~ A45|523| ~ J99|976|	Methionine--tRNA_ligase	E48
16	1	1	GI:409893878 ~ GI:409893881 ~ GI:443621282 ~ GI:4155214 ~ GI:4155217	26695|720| ~ 26695|723| ~ A45|1308| ~ J99|674| ~ J99|677|	Helicobacter_outer_membrane_protein	E48
23	0	0	GI:409894333 ~ GI:443620295 ~ GI:4155700	26695|1173| ~ A45|339| ~ J99|1111|	Helicobacter_outer_membrane_protein	E48
7	1	0	GI:409893848 ~ GI:443621320 ~ GI:4155172	26695|686| ~ A45|1344| ~ J99|641|	Ferrous_iron_transport_protein_B	E48
3	0	0	GI:409894243 ~ GI:443620902 ~ GI:4154867	26695|1086| ~ A45|931| ~ J99|348|	Transketolase	E48
3	0	0	GI:409893171 ~ GI:443620807 ~ GI:4154510	26695|7| ~ A45|839| ~ J99|7|	Helicobacter_outer_membrane_protein	E48
20	0	0	GI:409894224 ~ GI:443620882 ~ GI:4154882	26695|1068| ~ A45|913| ~ J99|366|	ATP-dependent_zinc_metalloprotease_FtsH	E48
2	1	0	GI:409893276 ~ GI:443621069 ~ GI:4154613	26695|111| ~ A45|1094| ~ J99|112|	hypothetical_protein	E48
9	1	1	GI:409893580 ~ GI:443620490 ~ GI:4155556	26695|407| ~ A45|521| ~ J99|978|	MscS_family_inner_membrane_protein_YnaI	E48
5	0	0	GI:409893377 ~ GI:443620978 ~ GI:4154720	26695|210| ~ A45|1004| ~ J99|206|	Glucose-inhibited_division_protein_A	E48
17	1	1	GI:409893374 ~ GI:443620981 ~ GI:4154717	26695|207| ~ A45|1007| ~ J99|203|	High_temperature_protein_G	E48
25	1	1	GI:409893271 ~ GI:443621074 ~ GI:4154608	26695|106| ~ A45|1099| ~ J99|107|	Heat_shock_protein_70	E48
2	0	0	GI:409893518 ~ GI:443620912 ~ GI:4154849	26695|347| ~ A45|943| ~ J99|339|	1-deoxy-D-xylulose-5-phosphate_synthase	E48
4	2	2	GI:409893559 ~ GI:443620473 ~ GI:4155574	26695|388| ~ A45|506| ~ J99|994|	3-octaprenyl-4-hydroxybenzoate_carboxy-lyase	E48
6	0	0	GI:409893587 ~ GI:443620497 ~ GI:4155545	26695|414| ~ A45|528| ~ J99|971|	Biosynthetic_arginine_decarboxylase	E48
1	0	0	GI:409894721 ~ GI:443620768 ~ GI:4156091	26695|1543| ~ A45|797| ~ J99|1474|	Penicillin-binding_protein_B ~ Penicillin-binding_protein_2	E48
1	0	0	GI:409894038 ~ GI:443621496 ~ GI:4155387	26695|879| ~ A45|1520| ~ J99|829|	hypothetical_protein	E48
5	1	1	GI:409893285 ~ GI:443621062 ~ GI:4154621	26695|119| ~ A45|1088| ~ J99|118|	Threonine--tRNA_ligase_2	E48
2	0	0	GI:409894431 ~ GI:443620539 ~ GI:4155782	26695|1265| ~ A45|567| ~ J99|1200|	NADH-quinone_oxidoreductase_subunit_L	E48
6	1	1	GI:409894254 ~ GI:443620230 ~ GI:4155606	26695|1097| ~ A45|278| ~ J99|1034|	Phosphogluconate_dehydratase	E48
5	0	0	GI:409894274 ~ GI:443620251 ~ GI:4155652	26695|1116| ~ A45|297| ~ J99|1055|	Flagellar_hook-associated_protein_1 ~ flagellar_hook-associated_protein_FlgK	E48
2	0	0	GI:409894062 ~ GI:443621518 ~ GI:4155414	26695|905| ~ A45|1540| ~ J99|855|	Flagellar_hook_protein_FlgE	E48
2	1	0	GI:409893519 ~ GI:443620911 ~ GI:4154850	26695|348| ~ A45|942| ~ J99|340|	Elongation_factor_4	E48
16	0	0	GI:409893639 ~ GI:443620178 ~ GI:4154969	26695|474| ~ A45|231| ~ J99|443|	Tyrosine_phosphorylated_protein_A	E48
8	0	0	GI:409894696 ~ GI:443620693 ~ GI:4156041	26695|1520| ~ A45|723| ~ J99|1428|	Glutamine--fructose-6-phosphate_aminotransferase_[isomerizing]	E48
2	0	0	GI:409894411 ~ GI:443620520 ~ GI:4155770	26695|1245| ~ A45|548| ~ J99|1181|	Dipeptide-binding_protein_DppE_precursor ~ Oligopeptide-binding_protein_AppA_precursor	E48
5	0	0	GI:409893992 ~ GI:443621170 ~ GI:4155344	26695|836| ~ A45|1193| ~ J99|790|	long-chain_fatty_acid_outer_membrane_transporter	E48
2	0	0	GI:409893873 ~ GI:443621290 ~ GI:4155207	26695|715| ~ A45|1315| ~ J99|669|	DNA_polymerase_III_subunit_tau	E48
2	0	0	NA ~ GI:443621080 ~ GI:4154615	26695|101| ~ A45|1104| ~ J99|102|	Trifunctional_nucleotide_phosphoesterase_protein_YfkN_precursor	E48
17	0	0	GI:409893779 ~ GI:443621386 ~ GI:4155111	26695|616| ~ A45|1415| ~ J99|573|	Aspartate--tRNA_ligase	E48
19	1	1	GI:409893629 ~ GI:443620815 ~ GI:4154958	26695|464| ~ A45|846| ~ J99|433|	Oligoendopeptidase_F,_plasmid	E48
9	0	0	GI:409893795 ~ GI:443621370 ~ GI:4155116	26695|632| ~ A45|1398| ~ J99|589|	Quinone-reactive_Ni/Fe-hydrogenase_large_chain	E48
4	0	0	GI:409894366 ~ GI:443620343 ~ GI:4155732	26695|1202| ~ A45|383| ~ J99|1138|	Heterocyst_differentiation_ATP-binding_protein_HepA	E48
7	1	1	GI:409893403 ~ GI:443620091 ~ GI:4154734	26695|234| ~ A45|150| ~ J99|231|	Proline--tRNA_ligase	E48
28	0	0	GI:409893233 ~ GI:443621112 ~ GI:4154576	26695|70| ~ A45|1136| ~ J99|70|	Urease_subunit_beta	E48
2	0	0	GI:409893515 ~ GI:443620915 ~ GI:4154846	26695|344| ~ A45|946| ~ J99|336|	Flagellar_M-ring_protein	E48
18	2	2	GI:409894273 ~ GI:443620250 ~ GI:4155635	26695|1115| ~ A45|296| ~ J99|1054|	Gamma-glutamyltranspeptidase_precursor	E48
1	0	0	GI:4154531	J99|26|	hypothetical_protein	E48
16	1	1	GI:409893264 ~ GI:443621081 ~ GI:4154603	26695|100| ~ A45|1105| ~ J99|101|	Methyl-accepting_chemotaxis_protein_4	E48
4	0	0	GI:409894069	26695|912|	Hemin_receptor_precursor	E48
6	0	0	GI:409894016 ~ GI:443620152 ~ GI:4155361	26695|860| ~ A45|208| ~ J99|810|	Plasminogen-binding_protein_PgbB	E48
19	2	0	GI:409893562 ~ GI:443620476 ~ GI:4155561	26695|391| ~ A45|509| ~ J99|991|	hypothetical_protein	E48
3	0	0	GI:409894237 ~ GI:443620896 ~ GI:4154873	26695|1080| ~ A45|925| ~ J99|354|	Lipid_A_export_ATP-binding/permease_protein_MsbA	E48
5	0	0	GI:409893301 ~ GI:409893302 ~ GI:443621046 ~ GI:443621047 ~ GI:4154649 ~ GI:4154650	26695|134| ~ 26695|135| ~ A45|1072| ~ A45|1073| ~ J99|133| ~ J99|134|	L-lactate_permease	E48
3	0	0	GI:409893452 ~ GI:443620113 ~ GI:4154795	26695|281| ~ A45|169| ~ J99|279|	ATP-dependent_zinc_metalloprotease_FtsH	E48
11	1	1	GI:409893464 ~ GI:443620959 ~ GI:4154808	26695|293| ~ A45|988| ~ J99|291|	Hemin-binding_lipoprotein	E48
9	0	0	GI:409894613 ~ GI:443620702 ~ GI:4155955	26695|1440| ~ A45|731| ~ J99|1351|	Oxa1Ec	E48
2	0	0	GI:409894656 ~ GI:443620655 ~ GI:4156016	26695|1481| ~ A45|679| ~ J99|1392|	Sulfate_permease_CysP	E48
43	0	0	GI:409893172 ~ GI:443619997 ~ GI:4154502	26695|8| ~ A45|62| ~ J99|8|	hypothetical_protein	E48
9	0	0	GI:409894321 ~ GI:443620306 ~ GI:4155679	26695|1163| ~ A45|349| ~ J99|1101|	Glucose-6-phosphate_isomerase	E48
6	0	0	GI:409893486 ~ GI:443620940 ~ GI:4154833	26695|313| ~ A45|970| ~ J99|311|	Arginine--tRNA_ligase	E48
8	1	1	GI:409894068 ~ GI:443621525 ~ GI:4155421	26695|911| ~ A45|1546| ~ J99|861|	Putative_outer_membrane_protein	E48
12	0	0	GI:409893513 ~ GI:443620917 ~ GI:4154844	26695|342| ~ A45|948| ~ J99|334|	CTP_synthase	E48
2	0	0	GI:409893691 ~ GI:4155009	26695|526| ~ J99|490|	hypothetical_protein	E48
7	0	0	GI:409894006 ~ GI:443620142 ~ GI:4155369	26695|850| ~ A45|198| ~ J99|802|	putative_ABC_transporter_ATP-binding_protein_YheS	E48
9	0	0	GI:409893915 ~ GI:443621245 ~ GI:4155263	26695|758| ~ A45|1271| ~ J99|712|	Ribonuclease_Y	E48
18	3	3	GI:409893647 ~ GI:443620175 ~ GI:4154973	26695|483| ~ A45|228| ~ J99|450|	Putative_outer_membrane_protein	E48
12	0	0	GI:409894715 ~ GI:443620762 ~ GI:4156069	26695|1537| ~ A45|791| ~ J99|1459|	preprotein_translocase_subunit_SecD	E48
12	0	0	GI:409893560 ~ GI:443620474 ~ GI:4155559	26695|389| ~ A45|507| ~ J99|993|	D-3-phosphoglycerate_dehydrogenase	E48
1	0	0	GI:409894556 ~ GI:443620740 ~ GI:4156063	26695|1386| ~ A45|769| ~ J99|1443|	Recombination_protein_N	E48
11	1	1	GI:409894067 ~ GI:443621524 ~ GI:4155420	26695|910| ~ A45|1545| ~ J99|860|	Helicobacter_outer_membrane_protein	E48
5	0	0	GI:409893450 ~ GI:443620115 ~ GI:4154793	26695|279| ~ A45|171| ~ J99|277|	Mechanosensitive_ion_channel	E48
4	0	0	GI:409893690 ~ GI:4155008	26695|525| ~ J99|489|	type_IV_secretion_system_protein_VirB9	E48
9	2	2	GI:409894066 ~ GI:443621523 ~ GI:4155419	26695|909| ~ A45|1544| ~ J99|859|	Helicobacter_outer_membrane_protein	E48
3	2	2	GI:4155411	J99|852|	Phosphate_acetyltransferase	E48
4	0	0	GI:409893416 ~ GI:443620079 ~ GI:4154751	26695|246| ~ A45|138| ~ J99|243|	Glutathione_import_ATP-binding_protein_GsiA	E48
14	0	0	GI:409893277 ~ GI:443621068 ~ GI:4154614	26695|112| ~ A45|1093| ~ J99|113|	Flagellin_N	E48
2	0	0	GI:443621527	A45|1548|	Brucella_heme_uptake_protein_A	E48
2	0	0	GI:409894432 ~ GI:443620540 ~ GI:4155783	26695|1266| ~ A45|568| ~ J99|1201|	NAD(P)H-quinone_oxidoreductase_chain_4_1 ~ NADH-quinone_oxidoreductase_subunit_M	E48
4	2	2	GI:409893522 ~ GI:443619977 ~ GI:4155615	26695|351| ~ A45|41| ~ J99|1030|	hypothetical_protein	E48
8	1	1	GI:409894653 ~ GI:443620653 ~ GI:4155991	26695|1479| ~ A45|677| ~ J99|1390|	type_I_secretion_outer_membrane_protein,_TolC_family	E48
19	0	0	GI:409893765 ~ GI:443621401 ~ GI:4155099	26695|600| ~ A45|1430| ~ J99|561|	Flagellin_A	E48
13	1	1	GI:409893574 ~ GI:443620487 ~ GI:4155553	26695|401| ~ A45|519| ~ J99|981|	GMP_synthase_[glutamine-hydrolyzing]	E48
5	0	0	GI:409893945 ~ GI:443621218 ~ GI:4155292	26695|788| ~ A45|1239| ~ J99|741|	Competence_protein_ComM	E48
2	0	0	GI:409893489	26695|316|	hypothetical_protein	E48
28	2	2	GI:409894028 ~ GI:4155380	26695|872| ~ J99|822|	Catalase	E48
29	1	1	GI:409894289 ~ GI:443620266 ~ GI:4155639	26695|1132| ~ A45|312| ~ J99|1071|	ATP_synthase_subunit_alpha	E48
2	0	0	GI:443620937 ~ GI:4154836	A45|967| ~ J99|314|	hypothetical_protein	E48
12	1	1	GI:409893344 ~ GI:443620988 ~ GI:4154685	26695|177| ~ A45|1014| ~ J99|176|	Lysine--tRNA_ligase	E48
1	0	0	GI:409894442 ~ GI:443620551 ~ GI:4155807	26695|1276| ~ A45|581| ~ J99|1211|	Anthranilate_synthase_component_1	E48
2	0	0	GI:409893941 ~ GI:443621221 ~ GI:4155290	26695|784| ~ A45|1242| ~ J99|738|	Putative_outer_membrane_protein	E48
2	0	0	GI:409893215 ~ GI:443621132 ~ GI:4154554	26695|52| ~ A45|1156| ~ J99|48|	Propionate_transporter	E48
23	1	1	GI:409893731 ~ GI:443621435 ~ GI:4155062	26695|567| ~ A45|1462| ~ J99|530|	Cytosol_aminopeptidase	E48
10	1	0	GI:409893627 ~ GI:443620817 ~ GI:4154956	26695|462| ~ A45|848| ~ J99|431|	CoB--CoM_heterodisulfide_reductase,_subunit_B	E48
2	1	1	GI:409893895 ~ GI:443621266 ~ GI:4155222	26695|738| ~ A45|1292| ~ J99|692|	UDP-N-acetylmuramoyl-tripeptide--D-alanyl-D-_alanine_ligase	E48
7	2	1	GI:409894132 ~ GI:443620434 ~ GI:4155486	26695|973| ~ A45|473| ~ J99|924|	Cell_division_protein_FtsA	E48
17	0	0	GI:409893413 ~ GI:443620082 ~ GI:4154758	26695|243| ~ A45|141| ~ J99|240|	DEAD-box_ATP-dependent_RNA_helicase_CshA	E48
1	0	0	GI:409894433 ~ GI:443620541 ~ GI:4155784	26695|1267| ~ A45|569| ~ J99|1202|	NADH-quinone_oxidoreductase_subunit_N	E48
3	0	0	GI:409894127 ~ GI:443620430 ~ GI:4155489	26695|969| ~ A45|469| ~ J99|920|	2,3-bisphosphoglycerate-independent_phosphoglycerate_mutase	E48
4	1	1	GI:409893757 ~ GI:443621408 ~ GI:4155079	26695|593| ~ A45|1436| ~ J99|555|	Disulfide_bond_formation_protein_DsbB	E48
4	0	0	GI:409893306 ~ GI:443621043 ~ GI:4154642	26695|139| ~ A45|1069| ~ J99|137|	hypothetical_protein	E48
7	1	1	GI:409894523 ~ GI:443620203 ~ GI:4155895	26695|1355| ~ A45|253| ~ J99|1287|	Replicative_DNA_helicase	E48
2	1	0	GI:409894131 ~ GI:443620433 ~ GI:4155485	26695|972| ~ A45|472| ~ J99|923|	Peptidyl-prolyl_cis-trans_isomerase_D	E48
11	1	1	GI:409893419 ~ GI:443620075 ~ GI:4154753	26695|248| ~ A45|136| ~ J99|245|	Helicobacter_outer_membrane_protein	E48
17	2	2	GI:409893259 ~ GI:443621086 ~ GI:4154598	26695|95| ~ A45|1110| ~ J99|96|	Threonine_synthase	E48
3	0	0	GI:409893444 ~ GI:443620121 ~ GI:4154784	26695|273| ~ A45|177| ~ J99|271|	Guanosine-5'-triphosphate,3'-diphosphate_pyrophosphatase	E48
5	1	1	GI:409893394 ~ GI:443620101 ~ GI:4154740	26695|225| ~ A45|160| ~ J99|222|	Helicobacter_outer_membrane_protein	E48
14	0	0	GI:409893299 ~ GI:443621049 ~ GI:4154633	26695|132| ~ A45|1075| ~ J99|131|	Lactate_utilization_protein_B	E48
19	1	1	GI:409893671 ~ GI:443621457 ~ GI:4155001	26695|509| ~ A45|1483| ~ J99|473|	3-hydroxylaminophenol_mutase	E48
6	0	0	GI:409893683 ~ GI:4155014	26695|519| ~ J99|483|	hypothetical_protein	E48
19	1	1	GI:409893983 ~ GI:443621180 ~ GI:4155333	26695|826| ~ A45|1202| ~ J99|781|	Inosine-5'-monophosphate_dehydrogenase	E48
14	2	2	GI:409894238 ~ GI:443620897 ~ GI:4154874	26695|1081| ~ A45|926| ~ J99|353|	Putative_outer_membrane_protein	E48
5	0	0	GI:409893448 ~ GI:443620117 ~ GI:4154791	26695|277| ~ A45|173| ~ J99|275|	TrkA-C_domain_protein	E48
14	2	2	GI:409893769 ~ GI:443621397 ~ GI:4155090	26695|604| ~ A45|1426| ~ J99|565|	type_I_secretion_outer_membrane_protein,_TolC_family	E48
1	0	0	GI:409893542 ~ GI:409893814 ~ GI:4155580 ~ GI:4155139	26695|371| ~ 26695|651| ~ J99|1011| ~ J99|609|	Glycosyltransferase_family_10_(fucosyltransferase)	E48
27	0	0	GI:409894173 ~ GI:443620832 ~ GI:4154933	26695|1018| ~ A45|863| ~ J99|415|	Periplasmic_serine_endoprotease_DegP_precursor	E48
6	0	0	GI:409893822 ~ GI:443621344 ~ GI:4155155	26695|658| ~ A45|1370| ~ J99|616|	Aspartyl/glutamyl-tRNA(Asn/Gln)_amidotransferase_subunit_B	E48
9	1	1	GI:409893420 ~ GI:443620074 ~ GI:4154754	26695|249| ~ A45|135| ~ J99|246|	Helicobacter_outer_membrane_protein	E48
10	2	2	GI:409894322 ~ GI:443620305 ~ GI:4155692	26695|1164| ~ A45|348| ~ J99|1102|	Putative_outer_membrane_protein	E48
3	1	1	GI:409893202 ~ GI:443621141 ~ GI:4154546	26695|40| ~ A45|1165| ~ J99|38|	Alginate_biosynthesis_protein_AlgA	E48
17	0	0	GI:409893812 ~ GI:443621353 ~ GI:4155137	26695|649| ~ A45|1379| ~ J99|607|	Aspartate_ammonia-lyase	E48
28	0	0	GI:409894287 ~ GI:443620264 ~ GI:4155651	26695|1130| ~ A45|310| ~ J99|1069|	ATP_synthase_subunit_beta	E48
1	0	0	GI:409894524 ~ GI:443620204 ~ GI:4155896	26695|1356| ~ A45|254| ~ J99|1288|	Nicotinamide_nucleotide_repair_protein	E48
2	0	0	GI:409893648 ~ GI:443620174 ~ GI:4154974	26695|484| ~ A45|227| ~ J99|451|	Putative_outer_membrane_protein	E48
2	0	0	GI:409894040 ~ GI:443621498 ~ GI:4155389	26695|881| ~ A45|1522| ~ J99|831|	Cysteine--tRNA_ligase	E48
10	0	0	GI:409894011 ~ GI:443620147 ~ GI:4155356	26695|855| ~ A45|203| ~ J99|805|	Bifunctional_protein_HldE	E48
7	0	0	GI:409893635 ~ GI:443620809 ~ GI:4154965	26695|470| ~ A45|840| ~ J99|439|	Glutamate--tRNA_ligase	E48
13	1	1	GI:409894485 ~ GI:443620597 ~ GI:4155857	26695|1318| ~ A45|625| ~ J99|1251|	Fumarate_hydratase_class_II	E48
4	1	0	GI:409893988 ~ GI:443621175 ~ GI:4155327	26695|831| ~ A45|1197| ~ J99|786|	GTP-binding_protein_EngA	E48
12	2	2	GI:409894435 ~ GI:443620543 ~ GI:4155786	26695|1269| ~ A45|571| ~ J99|1204|	Phosphomannomutase/phosphoglucomutase	E48
6	0	0	GI:409893668 ~ GI:443621472 ~ GI:4154999	26695|506| ~ A45|1500| ~ J99|471|	putative_FAD-linked_oxidoreductase	E48
9	0	0	GI:409893533 ~ GI:443620446 ~ GI:4155591	26695|362| ~ A45|480| ~ J99|1020|	Biotin_carboxylase	E48
3	1	1	GI:409894673 ~ GI:443620673 ~ GI:4156022	26695|1497| ~ A45|699| ~ J99|1408|	Putative_electron_transport_protein_YccM	E48
4	0	0	GI:409894190 ~ GI:443620848 ~ GI:4154928	26695|1034| ~ A45|879| ~ J99|399|	Flagella-associated_GTP-binding_protein	E48
3	0	0	GI:409894693 ~ GI:443620690 ~ GI:4156038	26695|1517| ~ A45|720| ~ J99|1425|	Chromosomal_replication_initiator_protein_DnaA	E48
6	0	0	GI:409893829 ~ GI:443621337 ~ GI:4155149	26695|665| ~ A45|1363| ~ J99|623|	Oxygen-independent_coproporphyrinogen-III_oxidase	E48
7	0	0	GI:409893248 ~ GI:443621097 ~ GI:4154590	26695|84| ~ A45|1121| ~ J99|83|	hypothetical_protein	E48
1	0	0	GI:409893293 ~ GI:443621055 ~ GI:4154627	26695|126| ~ A45|1081| ~ J99|125|	L-serine_dehydratase_1	E48
18	1	1	GI:409894510 ~ GI:443620189 ~ GI:4155883	26695|1343| ~ A45|240| ~ J99|1275|	Carboxy-terminal_processing_protease_CtpB_precursor	E48
8	1	0	GI:409893984 ~ GI:443621179 ~ GI:4155334	26695|827| ~ A45|1201| ~ J99|782|	Glutamyl-tRNA(Gln)_amidotransferase_subunit_A	E48
2	0	0	GI:409894439 ~ GI:443620548 ~ GI:4155804	26695|1273| ~ A45|578| ~ J99|1208|	Tryptophan_biosynthesis_protein_TrpCF	E48
13	0	0	GI:409894535 ~ GI:443620211 ~ GI:4155892	26695|1367| ~ A45|261| ~ J99|1295|	ATP-dependent_Clp_protease_ATP-binding_subunit_ClpX	E48
22	1	0	GI:409893948 ~ GI:443621215 ~ GI:4155287	26695|791| ~ A45|1236| ~ J99|744|	Trigger_factor	E48
1	0	0	GI:409894097 ~ GI:443620402 ~ GI:4155453	26695|938| ~ A45|438| ~ J99|889|	Amino-acid_carrier_protein_AlsT	E48
1	0	0	GI:409894615 ~ GI:443620700 ~ GI:4155957	26695|1442| ~ A45|729| ~ J99|1353|	tRNA_modification_GTPase_MnmE	E48
14	1	0	GI:409893247 ~ GI:443621098 ~ GI:4154589	26695|83| ~ A45|1122| ~ J99|82|	Malate:quinone_oxidoreductase	E48
6	0	0	GI:409893667 ~ GI:443621473 ~ GI:4154998	26695|505| ~ A45|1501| ~ J99|470|	Plasminogen-binding_protein_PgbA	E48
1	0	0	GI:409893786 ~ GI:443621379 ~ GI:4155106	26695|623| ~ A45|1408| ~ J99|581|	UDP-N-acetylmuramate--L-alanine_ligase	E48
10	0	0	GI:409893295 ~ GI:443621053 ~ GI:4154629	26695|128| ~ A45|1079| ~ J99|127|	Phospho-2-dehydro-3-deoxyheptonate_aldolase	E48
10	1	1	GI:409893543 ~ GI:443620457 ~ GI:4155581	26695|372| ~ A45|490| ~ J99|1010|	NAD(P)-specific_glutamate_dehydrogenase	E48
1	0	0	GI:409893388 ~ GI:443620969 ~ GI:4154730	26695|220| ~ A45|995| ~ J99|217|	Lon_protease_2	E48
16	0	0	GI:409894307 ~ GI:443620320 ~ GI:4155673	26695|1149| ~ A45|363| ~ J99|1087|	hypothetical_protein	E48
5	0	0	GI:409894659 ~ GI:443620658 ~ GI:4156007	26695|1484| ~ A45|682| ~ J99|1395|	UDP-N-acetylmuramoyl-L-alanyl-D-glutamate--L-_lysine_ligase	E48
2	1	1	GI:409893180 ~ GI:443620005 ~ GI:4154518	26695|16| ~ A45|70| ~ J99|16|	hypothetical_protein	E48
3	1	1	GI:409893236 ~ GI:443621109 ~ GI:4154579	26695|73| ~ A45|1133| ~ J99|73|	Phosphoglucosamine_mutase	E48
15	0	0	GI:409894167 ~ GI:443620826 ~ GI:4154947	26695|1011| ~ A45|857| ~ J99|421|	protease3	E48
1	0	0	GI:409894339 ~ GI:443620288 ~ GI:4155704	26695|1177| ~ A45|333| ~ J99|1115|	Inner_membrane_transport_protein_YajR	E48
10	0	0	GI:409893676 ~ GI:443621463 ~ GI:4154993	26695|514| ~ A45|1489| ~ J99|477|	ATP-dependent_protease_ATPase_subunit_ClpY	E48
2	0	0	GI:409893658 ~ GI:443621482 ~ GI:4154985	26695|494| ~ A45|1507| ~ J99|461|	Na+-dependent_transporters_of_the_SNF_family_protein	E48
10	1	1	GI:409894349 ~ GI:443620280 ~ GI:4155714	26695|1186| ~ A45|325| ~ J99|1123|	Histidine--tRNA_ligase	E48
4	0	0	GI:443621023 ~ GI:4154652	A45|1049| ~ J99|157|	Sensor_protein_PfeS	E48
8	1	1	GI:409893569 ~ GI:443620483 ~ GI:4155567	26695|397| ~ A45|515| ~ J99|985|	putative_cysteine_desulfurase	E48
1	0	0	GI:409894209 ~ GI:443620867 ~ GI:4154905	26695|1053| ~ A45|898| ~ J99|381|	hypothetical_protein	E48
3	0	0	GI:409894266 ~ GI:443620243 ~ GI:4155619	26695|1109| ~ A45|290| ~ J99|1047|	Adenylosuccinate_lyase	E48
3	0	0	GI:409893806 ~ GI:443621358 ~ GI:4155131	26695|643| ~ A45|1384| ~ J99|601|	Glutamate--tRNA_ligase_1	E48
3	0	0	GI:409894717 ~ GI:443620764 ~ GI:4156071	26695|1539| ~ A45|793| ~ J99|1457|	Sodium/proton_antiporter_NhaA	E48
1	0	0	GI:409894230 ~ GI:443620889 ~ GI:4154876	26695|1073| ~ A45|918| ~ J99|361|	hypothetical_protein	E48
9	0	0	GI:409893712 ~ GI:443621454 ~ GI:4155037	26695|548| ~ A45|1480| ~ J99|509|	hypothetical_protein	E48
1	0	0	GI:409893435 ~ GI:443620130 ~ GI:4154788	26695|264| ~ A45|186| ~ J99|262|	(Dimethylallyl)adenosine_tRNA_methylthiotransferase_MiaB	E48
1	0	0	GI:409894331 ~ GI:443620297 ~ GI:4155691	26695|1172| ~ A45|340| ~ J99|1110|	Putative_permease_YicO	E48
15	1	1	GI:409893820 ~ GI:443621345 ~ GI:4155154	26695|657| ~ A45|1371| ~ J99|615|	Peptidase_M16_inactive_domain_protein	E48
1	0	0	GI:409894582 ~ GI:443620051 ~ GI:4155920	26695|1412| ~ A45|115| ~ J99|1325|	Flagellum-specific_ATP_synthase	E48
1	0	0	GI:409894194 ~ GI:443620852 ~ GI:4154914	26695|1038| ~ A45|883| ~ J99|395|	Lipid_A_core_-_O-antigen_ligase	E48
4	1	1	GI:409894298 ~ GI:443620275 ~ GI:4155657	26695|1141| ~ A45|321| ~ J99|1080|	hypothetical_protein	E48
20	3	3	GI:409893762 ~ GI:443621403 ~ GI:4155097	26695|597| ~ A45|1432| ~ J99|559|	Chemotaxis_regulator_BdlA	E48
1	0	0	GI:409893843 ~ GI:443621323 ~ GI:4155177	26695|682| ~ A45|1347| ~ J99|638|	Bifunctional_protein_GlmU	E48
2	0	0	GI:409894259 ~ GI:443620235 ~ GI:4155621 ~ GI:4155618	26695|1102| ~ A45|283| ~ J99|1039| ~ J99|1040|	Glycosyl_transferase_family_8 ~ lipopolysaccharide_1,3-galactosyltransferase	E48
12	1	0	GI:409893441 ~ GI:443620124 ~ GI:4154781	26695|270| ~ A45|180| ~ J99|268|	PPR_repeat	E48
9	0	0	GI:409893472 ~ GI:443620951 ~ GI:4154823	26695|301| ~ A45|980| ~ J99|300|	Glutamate-1-semialdehyde_2,1-aminomutase	E48
2	0	0	GI:409893935 ~ GI:443621227 ~ GI:4155283	26695|778| ~ A45|1248| ~ J99|732|	hypothetical_protein	E48
1	0	0	GI:409893564 ~ GI:443620478 ~ GI:4155563	26695|393| ~ A45|511| ~ J99|989|	3-phosphoshikimate_1-carboxyvinyltransferase_1	E48
15	4	4	GI:409893187 ~ GI:443621159 ~ GI:4154527	26695|22| ~ A45|1183| ~ J99|22|	Citrate_synthase	E48
9	0	0	GI:409893317 ~ GI:443621033 ~ GI:4154655	26695|150| ~ A45|1058| ~ J99|148|	Enolase	E48
28	0	0	GI:409893188 ~ GI:443621158 ~ GI:4154528	26695|23| ~ A45|1182| ~ J99|23|	Isocitrate_dehydrogenase_[NADP]	E48
4	0	0	GI:409894255 ~ GI:443620231 ~ GI:4155607	26695|1098| ~ A45|279| ~ J99|1035|	Glucose-6-phosphate_1-dehydrogenase	E48
5	1	0	GI:409893994 ~ GI:443621168 ~ GI:4155346	26695|838| ~ A45|1191| ~ J99|792|	DNA/pantothenate_metabolism_flavoprotein	E48
2	1	0	GI:409894376 ~ GI:443620354 ~ GI:4155729	26695|1213| ~ A45|394| ~ J99|1148|	Phosphoribosylamine--glycine_ligase	E48
2	0	0	GI:409893330 ~ GI:443621019 ~ GI:4154671	26695|164| ~ A45|1045| ~ J99|161|	putative_protease_YhbU_precursor	E48
2	0	0	GI:409893811 ~ GI:443621354 ~ GI:4155136	26695|648| ~ A45|1380| ~ J99|606|	UDP-N-acetylglucosamine_1-carboxyvinyltransferase	E48
9	0	0	GI:409893975 ~ GI:443621187 ~ GI:4155323	26695|819| ~ A45|1209| ~ J99|774|	Homoserine_dehydrogenase	E48
3	0	0	GI:409894460 ~ GI:443620572 ~ GI:4155830	26695|1294| ~ A45|600| ~ J99|1228|	preprotein_translocase_subunit_SecY	E48
6	3	2	GI:409893901 ~ GI:443621259 ~ GI:4155250	26695|744| ~ A45|1286| ~ J99|698|	Fibronectin_type_III_domain_protein	E48
1	1	1	GI:409894337 ~ GI:443620289 ~ GI:4155703	26695|1176| ~ A45|334| ~ J99|1114|	Nucleoside_permease_NupX	E48
6	1	0	GI:409894282 ~ GI:443620259 ~ GI:4155646	26695|1124| ~ A45|305| ~ J99|1064|	translocation_protein_TolB	E48
2	0	0	GI:409894125 ~ GI:443620427 ~ GI:4155476	26695|966| ~ A45|466| ~ J99|917|	Outer_membrane_efflux_protein	E48
1	1	1	GI:409893724 ~ GI:443621442 ~ GI:4155049	26695|560| ~ A45|1469| ~ J99|521|	hypothetical_protein	E48
1	0	0	GI:409894178 ~ GI:443620836 ~ GI:4154937	26695|1022| ~ A45|867| ~ J99|411|	hypothetical_protein	E48
8	1	1	GI:409893345 ~ GI:443620989 ~ GI:4154686	26695|178| ~ A45|1015| ~ J99|177|	Serine_hydroxymethyltransferase	E48
2	0	0	GI:409893823 ~ GI:443621343 ~ GI:4155156	26695|659| ~ A45|1369| ~ J99|617|	peptidyl-prolyl_cis-trans_isomerase_SurA	E48
2	0	0	GI:409894644 ~ GI:443620644 ~ GI:4155982	26695|1470| ~ A45|668| ~ J99|1381|	Serine--tRNA_ligase	E48
3	1	1	GI:409893870 ~ GI:443621293 ~ GI:4155204	26695|712| ~ A45|1318| ~ J99|666|	RNA_polymerase_sigma-54_factor_1	E48
3	0	0	GI:409894336 ~ GI:443620290 ~ GI:4155702	26695|1175| ~ A45|335| ~ J99|1113|	Phosphopentomutase	E48
8	0	0	GI:409893719 ~ GI:443621446 ~ GI:4155044	26695|556| ~ A45|1473| ~ J99|517|	3-oxoacyl-[acyl-carrier-protein]_synthase_2	E48
3	0	0	GI:409894704 ~ GI:443620751 ~ GI:4156093	26695|1526| ~ A45|780| ~ J99|1470|	Cytochrome_b	E48
3	0	0	GI:409893280 ~ GI:409893282 ~ GI:409894346 ~ GI:443621065 ~ GI:4154618	26695|115| ~ 26695|117| ~ 26695|1183| ~ A45|1090| ~ J99|116|	hypothetical_protein	E48
3	0	0	GI:409893421 ~ GI:443620073 ~ GI:4154770	26695|250| ~ A45|134| ~ J99|247|	Adenylosuccinate_synthetase	E48
1	0	0	GI:4155484	J99|926|	hypothetical_protein	E48
7	0	0	GI:409894098 ~ GI:443620403 ~ GI:4155445	26695|939| ~ A45|439| ~ J99|890|	D-amino_acid_dehydrogenase_small_subunit	E48
1	0	0	GI:409893940 ~ GI:443621222 ~ GI:4155280	26695|783| ~ A45|1243| ~ J99|737|	Lipoprotein-releasing_system_transmembrane_protein_LolC ~ Lipoprotein-releasing_system_transmembrane_protein_LolE	E48
3	0	0	GI:409894174 ~ GI:443620833 ~ GI:4154934	26695|1019| ~ A45|864| ~ J99|414|	Bifunctional_enzyme_IspD/IspF	E48
6	0	0	GI:409893433 ~ GI:443620132 ~ GI:4154769	26695|262| ~ A45|188| ~ J99|260|	chlorohydrolase ~ 8-oxoguanine_deaminase	E48
10	1	1	GI:409894423 ~ GI:443620531 ~ GI:4155794	26695|1257| ~ A45|559| ~ J99|1192|	NADH-quinone_oxidoreductase_subunit_D	E48
1	0	0	GI:409894671 ~ GI:443620671 ~ GI:4156004	26695|1495| ~ A45|697| ~ J99|1406|	Glutamate_permease	E48
1	0	0	GI:409894330 ~ GI:443620298 ~ GI:4155690	26695|1171| ~ A45|341| ~ J99|1109|	L-fucose_permease	E48
15	0	0	GI:409894264 ~ GI:443620241 ~ GI:4155626	26695|1107| ~ A45|288| ~ J99|1045|	Pyruvate_synthase_subunit_PorA	E48
3	0	0	GI:409893545 ~ GI:443620459 ~ GI:4155583	26695|374| ~ A45|492| ~ J99|1008|	Protease_HtpX	E48
7	1	1	GI:409893665 ~ GI:443621475 ~ GI:4154996	26695|503| ~ A45|1503| ~ J99|468|	Glycyl-glycine_endopeptidase_ALE-1_precursor	E48
8	0	0	GI:409893456 ~ GI:443620109 ~ GI:4154810	26695|285| ~ A45|165| ~ J99|283|	Diaminopimelate_decarboxylase	E48
8	0	0	GI:409894386 ~ GI:443620368 ~ GI:4155744	26695|1223| ~ A45|406| ~ J99|1158|	Aspartokinase	E48
4	1	0	GI:409893182 ~ GI:443620007 ~ GI:4154520	26695|18| ~ A45|72| ~ J99|18|	Carboxynorspermidine/carboxyspermidine_decarboxylase	E48
5	1	1	GI:443621513 ~ GI:4155410	A45|1535| ~ J99|851|	Acetate_kinase	E48
7	0	0	GI:409893928 ~ GI:443621234 ~ GI:4155267	26695|771| ~ A45|1255| ~ J99|725|	Tyrosine--tRNA_ligase	E48
24	1	1	GI:409894505 ~ GI:443620184 ~ GI:4155865	26695|1338| ~ A45|235| ~ J99|1270|	Phosphoglycerate_kinase	E48
6	2	2	GI:409893789 ~ GI:443621376 ~ GI:4155122	26695|626| ~ A45|1405| ~ J99|584|	2,3,4,5-tetrahydropyridine-2,6-dicarboxylate_N-succinyltransferase	E48
1	0	0	GI:409893902 ~ GI:443621258 ~ GI:4155251	26695|745| ~ A45|1285| ~ J99|699|	tRNA_(guanine-N(7)-)-methyltransferase	E48
28	1	1	GI:409894365 ~ GI:443620342 ~ GI:4155731	26695|1201| ~ A45|382| ~ J99|1137|	Elongation_factor_Tu	E48
11	3	1	GI:409894672 ~ GI:443620672 ~ GI:4156021	26695|1496| ~ A45|698| ~ J99|1407|	Saccharopine_dehydrogenase	E48
7	0	0	GI:409894680 ~ GI:443620679 ~ GI:4156020	26695|1503| ~ A45|705| ~ J99|1414|	hypothetical_protein	E48
1	0	0	GI:409894710 ~ GI:443620757 ~ GI:4156079	26695|1532| ~ A45|786| ~ J99|1464|	Bifunctional_protein_FolC	E48
5	0	0	GI:409894157 ~ GI:443620017	26695|998| ~ A45|79|	hypothetical_protein	E48
1	0	0	GI:409894438 ~ GI:443620547 ~ GI:4155803	26695|1272| ~ A45|577| ~ J99|1207|	Tryptophan_synthase_beta_chain	E48
11	0	0	GI:409893850 ~ GI:443621318 ~ GI:4155185	26695|689| ~ A45|1342| ~ J99|652|	Acetyl-CoA_acetyltransferase	E48
5	0	0	GI:409893333 ~ GI:443621016 ~ GI:4154674	26695|167| ~ A45|1042| ~ J99|164|	Molybdopterin_molybdenumtransferase	E48
8	0	0	GI:409893834 ~ GI:443621332 ~ GI:4155168	26695|672| ~ A45|1356| ~ J99|629|	Aspartate_aminotransferase	E48
6	0	0	GI:409893398 ~ GI:443620097 ~ GI:4154744	26695|229| ~ A45|156| ~ J99|226|	Bifunctional_glutathionylspermidine_synthetase/amidase	E48
4	0	0	GI:409893586 ~ GI:443620496 ~ GI:4155544	26695|413| ~ A45|527| ~ J99|972|	GDP-mannose-dependent_alpha-mannosyltransferase	E48
8	0	0	GI:409893581 ~ GI:443620491 ~ GI:4155557	26695|408| ~ A45|522| ~ J99|977|	Cyclopropane-fatty-acyl-phospholipid_synthase	E48
7	2	1	GI:409894666 ~ GI:443620666 ~ GI:4156014	26695|1490| ~ A45|692| ~ J99|1401|	Helicobacter_outer_membrane_protein	E48
2	1	1	GI:409893376 ~ GI:443620979 ~ GI:4154719	26695|209| ~ A45|1005| ~ J99|205|	Succinyl-diaminopimelate_desuccinylase	E48
2	0	0	GI:409894509 ~ GI:443620188 ~ GI:4155882	26695|1342| ~ A45|239| ~ J99|1274|	hypothetical_protein	E48
14	0	0	GI:409893385 ~ GI:443620972 ~ GI:4154727	26695|217| ~ A45|998| ~ J99|214|	Cysteine_desulfurase	E48
9	3	3	GI:409894133 ~ GI:443620435 ~ GI:4155487	26695|974| ~ A45|474| ~ J99|925|	Cell_division_protein_FtsZ	E48
16	0	0	GI:409893359 ~ GI:443621000 ~ GI:4154690	26695|192| ~ A45|1026| ~ J99|189|	S-adenosylmethionine_synthase	E48
4	0	0	GI:409893891 ~ GI:443621270 ~ GI:4155235	26695|734| ~ A45|1296| ~ J99|688|	Soluble_hydrogenase_42_kDa_subunit	E48
1	0	0	GI:409893794 ~ GI:4155126	26695|631| ~ J99|588|	Quinone-reactive_Ni/Fe-hydrogenase_small_chain_precursor	E48
1	0	0	GI:409893410 ~ GI:443620085 ~ GI:4154755	26695|240| ~ A45|144| ~ J99|237|	Sensor_protein_ZraS	E48
9	0	0	GI:409893862 ~ GI:443621305 ~ GI:4155196	26695|702| ~ A45|1329| ~ J99|657|	Quorum-sensing_regulator_protein_F	E48
5	1	1	GI:409893203 ~ GI:443621140 ~ GI:4154547	26695|41| ~ A45|1164| ~ J99|39|	GDP-mannose_4,6-dehydratase	E48
1	0	0	GI:409894389 ~ GI:443620371 ~ GI:4155747	26695|1226| ~ A45|409| ~ J99|1161|	Dihydropteroate_synthase	E48
18	1	1	GI:443620165	A45|221|	Catalase	E48
6	0	0	GI:409893268 ~ GI:443621077 ~ GI:4154605	26695|103| ~ A45|1102| ~ J99|104|	Cystathionine_gamma-synthase	E48
9	1	1	GI:409894562 ~ GI:443620736 ~ GI:4156046	26695|1391| ~ A45|765| ~ J99|1437|	Alanine_dehydrogenase ~ Alanine_dehydrogenase_2	E48
4	0	0	GI:409893432 ~ GI:443620133 ~ GI:4154768	26695|261| ~ A45|189| ~ J99|259|	Dihydroorotase	E48
3	0	0	GI:409893651 ~ GI:443621489 ~ GI:4154977	26695|487| ~ A45|1514| ~ J99|454|	Voltage-gated_potassium_channel_Kch	E48
1	0	0	GI:409894629 ~ GI:443620628 ~ GI:4155971	26695|1456| ~ A45|654| ~ J99|1367|	putative_phospholipid_ABC_transporter_permease_protein_MlaE	E48
3	0	0	GI:409893322 ~ GI:443621028 ~ GI:4154660	26695|155| ~ A45|1053| ~ J99|153|	lipopolysaccharide_1,3-galactosyltransferase ~ General_stress_protein_A	E48
6	0	0	NA ~ GI:443620429 ~ GI:4155488	26695|968| ~ A45|468| ~ J99|919|	hypothetical_protein	E48
1	0	0	GI:409894650 ~ GI:443620650 ~ GI:4155988	26695|1476| ~ A45|674| ~ J99|1387|	Inner_membrane_transport_permease_YbhS ~ Inner_membrane_transport_permease_YbhR	E48
11	0	0	GI:409893699 ~ GI:4155019	26695|533| ~ J99|496|	hypothetical_protein	E48
2	0	0	GI:409893787 ~ GI:443621378 ~ GI:4155107	26695|624| ~ A45|1407| ~ J99|582|	LL-diaminopimelate_aminotransferase	E48
7	0	0	GI:409894394 ~ GI:443620377 ~ GI:4155757	26695|1231| ~ A45|414| ~ J99|1166|	Carbamoyl-phosphate_synthase_small_chain	E48
17	1	1	GI:409893751 ~ GI:443621414 ~ GI:4155084	26695|587| ~ A45|1442| ~ J99|550|	2-oxoglutarate_oxidoreductase_subunit_KorA	E48
17	3	3	GI:409893661 ~ GI:443621479 ~ GI:4154988	26695|497| ~ A45|1504| ~ J99|464|	DNA_polymerase_III_subunit_beta	E48
1	0	0	GI:409893761 ~ GI:443621404 ~ GI:4155096	26695|596| ~ A45|1433| ~ J99|558|	8-amino-7-oxononanoate_synthase_2	E48
1	0	0	GI:409893447 ~ GI:443620118 ~ GI:4154790	26695|276| ~ A45|174| ~ J99|274|	Queuine_tRNA-ribosyltransferase	E48
4	0	0	NA ~ GI:443619929	26695|471| ~ 26695|919| ~ A45|2| ~ J99|440| ~ J99|868|	Helicobacter_outer_membrane_protein	E48
2	0	0	GI:409894199 ~ GI:443620857 ~ GI:4154919	26695|1043| ~ A45|888| ~ J99|390|	putative_metallophosphoesterase	E48
5	0	0	GI:409894492 ~ GI:443620604 ~ GI:4155852	26695|1325| ~ A45|632| ~ J99|1258|	Heat_shock_protein_J	E48
2	0	0	GI:409893261 ~ GI:443621084 ~ GI:4154600	26695|97| ~ A45|1108| ~ J99|98|	hypothetical_protein	E48
11	1	1	GI:409893370 ~ GI:443621008 ~ GI:4154712	26695|203| ~ A45|1035| ~ J99|199|	Cell_division_inhibitor_MinD	E48
12	0	0	GI:409893730 ~ GI:443621436 ~ GI:4155073	26695|566| ~ A45|1463| ~ J99|529|	Ribosome-binding_ATPase_YchF	E48
2	0	0	GI:409893827 ~ GI:443621339 ~ GI:4155160	26695|663| ~ A45|1365| ~ J99|621|	Chorismate_synthase	E48
17	0	0	GI:409894258 ~ GI:443620234 ~ GI:4155620 ~ GI:4156045	26695|1101| ~ A45|282| ~ J99|1038| ~ J99|1438|	putative_formaldehyde_dehydrogenase_AdhA ~ NADP-dependent_alcohol_dehydrogenase_C_2	E48
1	0	0	GI:409894651 ~ GI:443620651 ~ GI:4155989	26695|1477| ~ A45|675| ~ J99|1388|	ABC-2_family_transporter_protein	E48
5	1	0	GI:409893927 ~ GI:443621235 ~ GI:4155266	26695|770| ~ A45|1256| ~ J99|724|	putative_enoyl-[acyl-carrier-protein]_reductase_II ~ Nitronate_monooxygenase	E48
1	0	0	GI:409894061 ~ GI:443621517 ~ GI:4155413	26695|904| ~ A45|1539| ~ J99|854|	flagellar_basal_body_rod_modification_protein	E48
12	0	0	GI:409893414 ~ GI:443620081 ~ GI:4154759	26695|244| ~ A45|140| ~ J99|241|	FtsH_protease_regulator_HflC	E48
10	0	0	GI:409893817 ~ GI:443621348 ~ GI:4155151	26695|654| ~ A45|1374| ~ J99|612|	FO_synthase_subunit_2	E48
4	0	0	GI:409894020 ~ GI:443620156 ~ GI:4155351	26695|864| ~ A45|212| ~ J99|814|	Lipid-A-disaccharide_synthase	E48
8	1	1	GI:409894495 ~ GI:443620607 ~ GI:4155868	26695|1328| ~ A45|635| ~ J99|1260|	tRNA-specific_2-thiouridylase_MnmA	E48
3	1	1	GI:409893469 ~ GI:443620954 ~ GI:4154802	26695|298| ~ A45|983| ~ J99|297|	GTP-binding_protein_obg	E48
6	0	0	GI:409893788 ~ GI:443621377 ~ GI:4155121	26695|625| ~ A45|1406| ~ J99|583|	4-hydroxy-3-methylbut-2-en-1-yl_diphosphate_synthase	E48
2	0	0	GI:409894124 ~ GI:443620426 ~ GI:4155475	26695|965| ~ A45|465| ~ J99|916|	membrane_fusion_protein_cluster_2_protein	E48
13	0	0	GI:409893389 ~ GI:443620968 ~ GI:4154731	26695|221| ~ A45|994| ~ J99|218|	Peptide_methionine_sulfoxide_reductase_msrA/msrB	E48
2	0	0	GI:409894588 ~ GI:443620057 ~ GI:4155932	26695|1420| ~ A45|123| ~ J99|1335|	putative_dual-specificity_RNA_methyltransferase_RlmN	E48
10	2	1	GI:409894192 ~ GI:443620850 ~ GI:4154912	26695|1036| ~ A45|881| ~ J99|397|	putative_peptidase	E48
13	3	3	GI:409894720 ~ GI:443620767 ~ GI:4156074	26695|1542| ~ A45|796| ~ J99|1454|	Elongation_factor_Ts	E48
2	0	0	GI:409893400 ~ GI:443620094 ~ GI:4154746	26695|231| ~ A45|153| ~ J99|228|	Putative_beta-lactamase_HcpC_precursor	E48
1	0	0	GI:409894663 ~ GI:443620662 ~ GI:4156011	26695|1488| ~ A45|686| ~ J99|1399|	lipopolysaccharide_ABC_transporter_permease	E48
2	0	0	GI:409893885 ~ GI:443621278 ~ GI:4155228	26695|727| ~ A45|1304| ~ J99|681|	hypothetical_protein	E48
2	0	0	GI:409894186 ~ GI:443620844 ~ GI:4154924	26695|1030| ~ A45|875| ~ J99|403|	Flagellar_motor_switch_protein_FliM	E48
4	0	0	GI:409893819 ~ GI:443621346 ~ GI:4155153	26695|656| ~ A45|1372| ~ J99|614|	FO_synthase_subunit_2	E48
4	0	0	GI:409894310 ~ GI:443620317 ~ GI:4155666	26695|1152| ~ A45|360| ~ J99|1090|	UDP-N-acetylglucosamine--N-acetylmuramyl-_(pentapeptide)_pyrophosphoryl-undecaprenol_N-acetylglucosamine_transferase	E48
1	0	0	GI:443621375 ~ GI:4155123	A45|1404| ~ J99|585|	Putative_beta-lactamase_HcpD_precursor	E48
2	0	0	GI:409894444 ~ GI:443620554 ~ GI:4155808	26695|1278| ~ A45|584| ~ J99|1212|	Glycosyltransferase_family_9_(heptosyltransferase)	E48
2	0	0	GI:409893238 ~ GI:443621107 ~ GI:4154581	26695|75| ~ A45|1131| ~ J99|75|	Peptide_chain_release_factor_1	E48
3	1	1	GI:409894166 ~ GI:443620825 ~ GI:4154946	26695|1010| ~ A45|856| ~ J99|422|	Dihydroorotate_dehydrogenase_(quinone)	E48
7	0	0	GI:409894624 ~ GI:443620623 ~ GI:4155966	26695|1451| ~ A45|649| ~ J99|1362|	Cytochrome_c551_peroxidase_precursor	E48
2	0	0	GI:409893879 ~ GI:443621284 ~ GI:4155215	26695|721| ~ A45|1310| ~ J99|676|	putative_L-asparaginase	E48
1	0	0	GI:409894410 ~ GI:443620519 ~ GI:4155769	26695|1244| ~ A45|547| ~ J99|1180|	Inner_membrane_ABC_transporter_permease_protein_YejB	E48
5	0	0	GI:409893893 ~ GI:443621268 ~ GI:4155237	26695|736| ~ A45|1294| ~ J99|690|	D-alanine--D-alanine_ligase	E48
4	0	0	GI:409894197 ~ GI:443620855 ~ GI:4154917	26695|1041| ~ A45|886| ~ J99|392|	putative_phosphohydrolase_(DHH_superfamily)	E48
12	0	0	GI:409894534 ~ GI:443620210 ~ GI:4155891	26695|1366| ~ A45|260| ~ J99|1294|	Rod_shape-determining_protein_MreB	E48
15	0	0	GI:409893316 ~ GI:443621034 ~ GI:4154654	26695|149| ~ A45|1059| ~ J99|147|	Recombinase_A	E48
5	0	0	GI:409894348 ~ GI:443620281 ~ GI:4155713	26695|1185| ~ A45|326| ~ J99|1122|	Aspartate-semialdehyde_dehydrogenase	E48
1	0	0	GI:409894217 ~ GI:443620875 ~ GI:4154891	26695|1061| ~ A45|906| ~ J99|373|	S-adenosylmethionine:tRNA_ribosyltransferase-isomerase	E48
3	1	1	GI:409893957 ~ GI:443621206 ~ GI:4155296	26695|800| ~ A45|1227| ~ J99|753|	Riboflavin_biosynthesis_protein_RibBA	E48
12	1	1	GI:409893523 ~ GI:443619976 ~ GI:4155609	26695|352| ~ A45|40| ~ J99|1029|	UDP-glucose_4-epimerase	E48
23	2	1	GI:409894453 ~ GI:443620565 ~ GI:4155841	26695|1287| ~ A45|594| ~ J99|1221|	DNA-directed_RNA_polymerase_subunit_alpha	E48
1	0	0	GI:409894670 ~ GI:443620670 ~ GI:4156003	26695|1494| ~ A45|696| ~ J99|1405|	bifunctional_diaminohydroxyphosphoribosylaminopyrimidine_deaminase/5-amino-6-(5-phosphoribosylamino)uracil_reductase	E48
1	0	0	GI:409893449 ~ GI:443620116 ~ GI:4154792	26695|278| ~ A45|172| ~ J99|276|	3-dehydroquinate_synthase	E48
5	0	0	GI:409893516 ~ GI:443620914 ~ GI:4154847	26695|345| ~ A45|945| ~ J99|337|	Flagellar_motor_switch_protein_G	E48
1	0	0	GI:409893412 ~ GI:443620083 ~ GI:4154757	26695|242| ~ A45|142| ~ J99|239|	Basal_body_P-ring_protein	E48
2	0	0	GI:409893527 ~ GI:443619972 ~ GI:4155613	26695|356| ~ A45|36| ~ J99|1025|	Ribonucleoside-diphosphate_reductase_subunit_beta	E48
5	1	0	GI:409894631 ~ GI:443620631 ~ GI:4155979	26695|1458| ~ A45|656| ~ J99|1369|	Branched-chain-amino-acid_transaminase_1	E48
0	1	1	GI:409893340 ~ GI:443620984 ~ GI:4154681	26695|173| ~ A45|1010| ~ J99|172|	Pseudaminic_acid_synthase	E48
2	0	0	GI:409893742 ~ GI:443621424 ~ GI:4155058	26695|578| ~ A45|1451| ~ J99|541|	Dihydroorotase	E48
10	0	0	GI:409893768 ~ GI:443621398 ~ GI:4155089	26695|603| ~ A45|1427| ~ J99|564|	Uroporphyrinogen_decarboxylase	E48
4	0	0	GI:409893460 ~ GI:4154804	26695|289| ~ J99|287|	Aliphatic_amidase	E48
9	0	0	GI:409893363 ~ GI:443621004 ~ GI:4154706	26695|196| ~ A45|1030| ~ J99|193|	Phosphate_acyltransferase	E48
1	0	0	GI:409893824 ~ GI:443621342 ~ GI:4155157	26695|660| ~ A45|1368| ~ J99|618|	tetratricopeptide_repeat_protein	E48
1	0	0	GI:409893437 ~ GI:443620128 ~ GI:4154777	26695|266| ~ A45|184| ~ J99|264|	hypothetical_protein	E48
2	0	0	GI:409894104 ~ GI:443620407 ~ GI:4155463	26695|944| ~ A45|443| ~ J99|894|	hypothetical_protein	E48
5	2	2	GI:409893858 ~ GI:443621309 ~ GI:4155192	26695|698| ~ A45|1333| ~ J99|653|	hypothetical_protein	E48
1	0	0	GI:409894517 ~ GI:443620197 ~ GI:4155875	26695|1349| ~ A45|247| ~ J99|1281|	Quinolinate_synthase_A	E48
3	0	0	GI:409893358 ~ GI:443620999 ~ GI:4154701	26695|191| ~ A45|1025| ~ J99|188|	UDP-3-O-acylglucosamine_N-acyltransferase	E48
13	0	0	GI:409894257 ~ GI:443620233 ~ GI:4155603	26695|1100| ~ A45|281| ~ J99|1037|	Glucokinase	E48
4	0	0	GI:443621314 ~ GI:4155189	A45|1338| ~ J99|648|	hypothetical_protein	E48
3	0	0	GI:409894214 ~ GI:443620872 ~ GI:4154888	26695|1058| ~ A45|903| ~ J99|376|	Holliday_junction_ATP-dependent_DNA_helicase_RuvB	E48
1	0	0	GI:409894440 ~ GI:443620549 ~ GI:4155805	26695|1274| ~ A45|579| ~ J99|1209|	Anthranilate_synthase_component_II	E48
15	1	0	GI:409894727 ~ GI:409894728 ~ GI:443620773 ~ GI:443620774 ~ GI:4156090 ~ GI:4156102	26695|1548| ~ 26695|1549| ~ A45|802| ~ A45|803| ~ J99|1479| ~ J99|1480|	corrinoid_ABC_transporter_substrate-binding_protein	E48
1	0	0	GI:409893539 ~ GI:443620452 ~ GI:4155597	26695|368| ~ A45|486| ~ J99|1014|	Ferrochelatase	E48
0	1	1	GI:409893583 ~ GI:443620493 ~ GI:4155548	26695|410| ~ A45|524| ~ J99|975|	hypothetical_protein	E48
2	1	1	GI:409893197 ~ GI:443621148 ~ GI:4154524	26695|32| ~ A45|1172| ~ J99|32|	hypothetical_protein	E48
2	0	0	GI:409893465 ~ GI:443620958 ~ GI:4154809	26695|294| ~ A45|987| ~ J99|292|	Dipeptide_transport_system_permease_protein_DppB	E48
5	1	1	GI:409894395 ~ GI:443620378 ~ GI:4155758	26695|1232| ~ A45|415| ~ J99|1167|	Formamidase	E48
1	1	0	GI:409893993 ~ GI:443621169 ~ GI:4155345	26695|837| ~ A45|1192| ~ J99|791|	UDP-N-acetylglucosamine_4,6-dehydratase_(inverting)	E48
1	0	0	GI:409893206 ~ GI:443621138 ~ GI:4154539	26695|43| ~ A45|1162| ~ J99|41|	Hydrogenase_isoenzymes_formation_protein_HypE	E48
2	0	0	GI:409894075 ~ GI:443621531 ~ GI:4155430	26695|917| ~ A45|1552| ~ J99|866|	Glyceraldehyde-3-phosphate_dehydrogenase_1	E48
5	1	1	GI:409894280 ~ GI:443620257 ~ GI:4155644	26695|1122| ~ A45|303| ~ J99|1062|	tol-pal_system_protein_YbgF	E48
3	0	0	GI:409894232 ~ GI:443620891 ~ GI:4154878	26695|1075| ~ A45|920| ~ J99|359|	High-affinity_nickel-transport_protein_NixA	E48
8	0	0	GI:409893364 ~ GI:443621005 ~ GI:4154707	26695|197| ~ A45|1031| ~ J99|194|	3-oxoacyl-[acyl-carrier-protein]_synthase_3	E48
6	0	0	GI:409893686 ~ GI:4155017	26695|522| ~ J99|486|	Type_IV_secretion_system_protein_VirB11	E48
1	0	0	GI:409893678 ~ GI:443621465 ~ GI:4154995	26695|516| ~ A45|1491| ~ J99|479|	L,D-transpeptidase_catalytic_domain	E48
6	1	1	GI:409894506 ~ GI:443620185 ~ GI:4155866	26695|1339| ~ A45|236| ~ J99|1271|	Glyceraldehyde-3-phosphate_dehydrogenase_2	E48
2	2	2	GI:409893497 ~ GI:443620928 ~ GI:4154860	26695|324| ~ A45|958| ~ J99|323|	Ketol-acid_reductoisomerase	E48
8	0	0	GI:409894012 ~ GI:443620148 ~ GI:4155357	26695|856| ~ A45|204| ~ J99|806|	ADP-L-glycero-D-manno-heptose-6-epimerase	E48
1	0	0	GI:409894425 ~ GI:443620533 ~ GI:4155796	26695|1259| ~ A45|561| ~ J99|1194|	hypothetical_protein	E48
6	1	0	GI:409893208 ~ GI:443621136 ~ GI:4154541	26695|45| ~ A45|1160| ~ J99|43|	Agmatine_deiminase	E48
1	0	0	GI:409894427 ~ GI:443620535 ~ GI:4155778	26695|1261| ~ A45|563| ~ J99|1196|	NADH-quinone_oxidoreductase_subunit_8	E48
9	0	0	GI:409894652 ~ GI:443620652 ~ GI:4155990	26695|1478| ~ A45|676| ~ J99|1389|	Multidrug_resistance_protein_MdtN	E48
3	0	0	GI:409894589 ~ GI:443620058 ~ GI:4155933	26695|1421| ~ A45|124| ~ J99|1334|	Arabinose_5-phosphate_isomerase_KdsD	E48
2	0	0	GI:409894223 ~ GI:443620881 ~ GI:4154881	26695|1067| ~ A45|912| ~ J99|367|	Ribosomal_protein_L11_methyltransferase	E48
3	0	0	GI:409893446 ~ GI:443620119 ~ GI:4154786	26695|275| ~ A45|175| ~ J99|273|	lipid_A_biosynthesis_lauroyl_acyltransferase ~ Lipid_A_biosynthesis_lauroyl_acyltransferase	E48
6	0	0	GI:409893566 ~ GI:443620480 ~ GI:4155565	26695|395| ~ A45|513| ~ J99|987|	Phenylalanine--tRNA_ligase_alpha_subunit	E48
2	0	0	GI:409893883 ~ GI:443621280 ~ GI:4155212	26695|725| ~ A45|1306| ~ J99|679|	putative_tRNA-dihydrouridine_synthase	E48
10	1	1	GI:409894742 ~ GI:443620788 ~ GI:4156118	26695|1563| ~ A45|817| ~ J99|1494|	Methionine_import_ATP-binding_protein_MetN	E48
1	0	0	GI:409894412 ~ GI:443620521 ~ GI:4155771	26695|1246| ~ A45|549| ~ J99|1182|	Tryptophan--tRNA_ligase	E48
7	0	0	GI:409893386 ~ GI:443620971 ~ GI:4154728	26695|218| ~ A45|997| ~ J99|215|	NifU-like_protein	E48
1	0	0	GI:443620743	A45|772|	Putative_beta-lactamase_HcpC_precursor	E48
2	1	1	GI:409894007 ~ GI:443620143 ~ GI:4155370	26695|851| ~ A45|199| ~ J99|803|	GMP_reductase	E48
12	1	1	GI:409894319 ~ GI:443620308 ~ GI:4155677	26695|1161| ~ A45|351| ~ J99|1099|	Ferredoxin--NADP_reductase	E48
3	0	0	GI:409893743 ~ GI:443621423 ~ GI:4155059	26695|579| ~ A45|1450| ~ J99|542|	preprotein_translocase_subunit_SecG ~ transport_protein_TonB	E48
4	0	0	GI:409894714 ~ GI:443620761 ~ GI:4156068	26695|1536| ~ A45|790| ~ J99|1460|	preprotein_translocase_subunit_SecF	E48
2	1	1	GI:409893325 ~ GI:443621024 ~ GI:4154663	26695|158| ~ A45|1050| ~ J99|156|	Delta-aminolevulinic_acid_dehydratase	E48
2	0	0	GI:409894563 ~ GI:443620735 ~ GI:4156047	26695|1392| ~ A45|764| ~ J99|1436|	Arginase	E48
10	0	0	GI:409893181 ~ GI:443620006 ~ GI:4154519	26695|17| ~ A45|71| ~ J99|17|	Chemotaxis_protein_CheV	E48
4	0	0	GI:409893716 ~ GI:443621450 ~ GI:4155041	26695|552| ~ A45|1476| ~ J99|513|	hypothetical_protein	E48
1	0	0	GI:409893478 ~ GI:443620945 ~ GI:4154819	26695|307| ~ A45|974| ~ J99|306|	putative_GTP-binding_protein_YjiA	E48
2	0	0	GI:443621515	A45|1537|	Phosphate_acetyltransferase	E48
3	0	0	GI:409894504 ~ GI:443620183 ~ GI:4155864	26695|1337| ~ A45|234| ~ J99|1269|	Magnesium_transport_protein_CorA	E48
11	0	0	GI:409893898 ~ GI:443621264 ~ GI:4155224	26695|740| ~ A45|1290| ~ J99|694|	Ribose-phosphate_pyrophosphokinase	E48
4	1	1	GI:409894660 ~ GI:443620659 ~ GI:4156008	26695|1485| ~ A45|683| ~ J99|1396|	Transaldolase	E48
3	0	0	GI:409893839 ~ GI:443621327 ~ GI:4155173	26695|678| ~ A45|1351| ~ J99|634|	UDP-N-acetyl-2-amino-2-deoxy-D-glucuronate_oxidase	E48
4	0	0	GI:409894737 ~ GI:443620783 ~ GI:4156099	26695|1558| ~ A45|812| ~ J99|1489|	RlpA-like_protein_precursor	E48
9	1	1	GI:409893257 ~ GI:443621088 ~ GI:4154596	26695|93| ~ A45|1112| ~ J99|94|	Putative_2-hydroxyacid_dehydrogenase	E48
7	0	0	GI:409894265 ~ GI:443620242 ~ GI:4155627	26695|1108| ~ A45|289| ~ J99|1046|	Pyruvate_synthase_subunit_PorB	E48
8	2	2	GI:409893646 ~ GI:443620176 ~ GI:4154972	26695|482| ~ A45|229| ~ J99|449|	Catalase	E48
3	0	0	GI:409894210 ~ GI:443620868 ~ GI:4154906	26695|1054| ~ A45|899| ~ J99|380|	Helicobacter_outer_membrane_protein	E48
1	0	0	GI:409893778 ~ GI:443621387 ~ GI:4155110	26695|615| ~ A45|1416| ~ J99|572|	Chemotaxis_protein_CheV	E48
3	0	0	GI:443621526	A45|1547|	Hemin_receptor_precursor	E48
1	0	0	GI:409894117 ~ GI:443620420 ~ GI:4155460	26695|957| ~ A45|456| ~ J99|907|	Glycerol-3-phosphate_dehydrogenase_[NAD(P)+]	E48
8	0	0	GI:409893718 ~ GI:443621447 ~ GI:4155056	26695|555| ~ A45|1474| ~ J99|516|	Acetyl-coenzyme_A_carboxylase_carboxyl_transferase_subunit_alpha	E48
11	1	1	GI:409893556 ~ GI:443620470 ~ GI:4155571	26695|385| ~ A45|503| ~ J99|997|	Chemotaxis_protein_CheV	E48
13	0	0	GI:409893978 ~ GI:443621184 ~ GI:4155329	26695|822| ~ A45|1206| ~ J99|777|	Thioredoxin_reductase	E48
6	1	1	GI:409893204 ~ GI:443621139 ~ GI:4154548	26695|42| ~ A45|1163| ~ J99|40|	GDP-L-fucose_synthase	E48
2	0	0	GI:409894081 ~ GI:443620387 ~ GI:4155439	26695|923| ~ A45|423| ~ J99|872|	hypothetical_protein ~ Protease_HtpX	E48
8	0	0	GI:409893251 ~ GI:443621094 ~ GI:4154593	26695|87| ~ A45|1118| ~ J99|86|	Malonyl_CoA-acyl_carrier_protein_transacylase	E48
1	0	0	GI:409893865 ~ GI:443621301 ~ GI:4155209	26695|705| ~ A45|1325| ~ J99|660|	Ribosomal_RNA_small_subunit_methyltransferase_H	E48
14	0	0	GI:409893338 ~ GI:443621011 ~ GI:4154667	26695|171| ~ A45|1038| ~ J99|168|	Fructose-bisphosphate_aldolase	E48
1	0	0	GI:409893406 ~ GI:443620089 ~ GI:4154736	26695|236| ~ A45|148| ~ J99|233|	Octaprenyl-diphosphate_synthase	E48
6	0	0	GI:409894239 ~ GI:443620898 ~ GI:4154863	26695|1082| ~ A45|927| ~ J99|352|	Aspartate_carbamoyltransferase	E48
7	0	0	GI:409893801 ~ GI:4155142	26695|638| ~ J99|595|	Helicobacter_outer_membrane_protein	E48
7	0	0	GI:409893323 ~ GI:443621027 ~ GI:4154661	26695|156| ~ A45|1052| ~ J99|154|	Putative_beta-lactamase_HcpD_precursor	E48
1	0	0	GI:409893700 ~ GI:4155020	26695|534| ~ J99|497|	hypothetical_protein	E48
2	1	0	GI:409893882 ~ GI:443621281 ~ GI:4155218	26695|724| ~ A45|1307| ~ J99|678|	Helicobacter_outer_membrane_protein	E48
3	0	0	GI:409893269 ~ GI:443621076 ~ GI:4154606	26695|104| ~ A45|1101| ~ J99|105|	O-acetylserine_dependent_cystathionine_beta-synthase	E48
2	0	0	GI:409894296 ~ GI:443620273 ~ GI:4155662	26695|1139| ~ A45|319| ~ J99|1078|	Methionyl-tRNA_formyltransferase	E48
1	0	0	GI:409894583 ~ GI:443620052 ~ GI:4155921	26695|1413| ~ A45|116| ~ J99|1326|	Pertussis_toxin_liberation_protein_H	E48
8	1	1	GI:409894617 ~ GI:443620616 ~ GI:4155959	26695|1444| ~ A45|642| ~ J99|1355|	hypothetical_protein	E48
1	0	0	GI:409894083 ~ GI:443620389 ~ GI:4155442	26695|925| ~ A45|425| ~ J99|876|	Farnesyl_diphosphate_synthase	E48
3	0	0	GI:409894116 ~ GI:443620419 ~ GI:4155459	26695|956| ~ A45|455| ~ J99|906|	Glycine--tRNA_ligase_alpha_subunit	E48
1	0	0	GI:409893677 ~ GI:443621464 ~ GI:4154994	26695|515| ~ A45|1490| ~ J99|478|	GTP-binding_protein_Era	E48
13	1	1	GI:409894288 ~ GI:443620265 ~ GI:4155638	26695|1131| ~ A45|311| ~ J99|1070|	F-ATPase_gamma_subunit	E48
4	0	0	GI:409894168 ~ GI:443620827 ~ GI:4154941	26695|1012| ~ A45|858| ~ J99|420|	4-hydroxy-tetrahydrodipicolinate_synthase	E48
16	1	1	GI:409893337 ~ GI:443621012 ~ GI:4154677	26695|170| ~ A45|1039| ~ J99|167|	Putative_peptidyl-prolyl_cis-trans_isomerase_Cbf2_precursor	E48
6	0	0	GI:409894175 ~ GI:443620834 ~ GI:4154935	26695|1020| ~ A45|865| ~ J99|413|	DNA-binding_transcriptional_regulator_BasR	E48
3	0	0	GI:409893738 ~ GI:443621428 ~ GI:4155069	26695|574| ~ A45|1455| ~ J99|537|	Bifunctional_protein_FolD_protein	E48
5	0	0	GI:409893918 ~ GI:443621242 ~ GI:4155255	26695|761| ~ A45|1268| ~ J99|714|	Signal_recognition_particle_receptor_FtsY	E48
1	1	1	GI:409894207 ~ GI:443620865 ~ GI:4154903	26695|1051| ~ A45|896| ~ J99|383|	UDP-3-O-[3-hydroxymyristoyl]_N-acetylglucosamine_deacetylase	E48
3	1	1	GI:409893475 ~ GI:443620948 ~ GI:4154816	26695|304| ~ A45|977| ~ J99|303|	(R)-stereoselective_amidase	E48
6	0	0	GI:409894189 ~ GI:443620847 ~ GI:4154927	26695|1033| ~ A45|878| ~ J99|400|	Flagellum_site-determining_protein_YlxH	E48
4	0	0	GI:409894596 ~ GI:443619943 ~ GI:4155950	26695|1426| ~ A45|12| ~ J99|1337|	Formyltetrahydrofolate_deformylase	E48
1	0	0	GI:409894205 ~ GI:443620863 ~ GI:4154901	26695|1049| ~ A45|894| ~ J99|385|	Homoserine_kinase	E48
2	0	0	GI:409893912 ~ GI:443621249 ~ GI:4155248	26695|755| ~ A45|1274| ~ J99|709|	N-carbamoyl-D-amino_acid_hydrolase	E48
8	1	0	GI:409893476 ~ GI:443620947 ~ GI:4154817	26695|305| ~ A45|976| ~ J99|304|	putative_polysaccharide_deacetylase_PdaA_precursor	E48
2	0	0	GI:409893987 ~ GI:443621176 ~ GI:4155337	26695|830| ~ A45|1198| ~ J99|785|	hypothetical_protein	E48
3	0	0	GI:409894597 ~ GI:443619942 ~ GI:4155951	26695|1427| ~ A45|11| ~ J99|1338|	Putative_signal_peptide_peptidase_SppA	E48
4	2	2	GI:409893309 ~ GI:443621040 ~ GI:4154645	26695|142| ~ A45|1066| ~ J99|140|	Cytochrome_c_oxidase_subunit_III	E48
3	0	0	GI:409894057	26695|898|	Acetate_kinase	E48
4	0	0	GI:409894252 ~ GI:443620228 ~ GI:4155604	26695|1095| ~ A45|276| ~ J99|1032|	Putative_beta-lactamase_HcpC_precursor	E48
1	0	0	GI:409893458 ~ GI:443620107 ~ GI:4154812	26695|287| ~ A45|163| ~ J99|285|	hypothetical_protein	E48
6	1	1	GI:409893737 ~ GI:443621429 ~ GI:4155068	26695|573| ~ A45|1456| ~ J99|536|	Signal_peptidase_I	E48
6	0	0	GI:409894293 ~ GI:443620270 ~ GI:4155659	26695|1136| ~ A45|316| ~ J99|1075|	putative_chromosome-partitioning_protein_ParB	E48
10	0	0	GI:409894547 ~ GI:443620746 ~ GI:4156058	26695|1377| ~ A45|775| ~ J99|1449|	Fructose-1,6-bisphosphatase_class_1	E48
4	0	0	GI:409894106 ~ GI:443620409 ~ GI:4155465	26695|946| ~ A45|445| ~ J99|896|	Acetyl-coenzyme_A_carboxylase_carboxyl_transferase_subunit_beta	E48
3	0	0	GI:409894179 ~ GI:443620837 ~ GI:4154938	26695|1023| ~ A45|868| ~ J99|410|	Curved_DNA-binding_protein	E48
2	0	0	GI:409894185 ~ GI:443620843 ~ GI:4154923	26695|1029| ~ A45|874| ~ J99|404|	Flagellar_motor_switch_protein_FliN	E48
5	0	0	GI:409893467 ~ GI:443620956 ~ GI:4154800	26695|296| ~ A45|985| ~ J99|295|	Stage_0_sporulation_protein_KD	E48
9	1	0	GI:409893289 ~ GI:443621058 ~ GI:4154636	26695|123| ~ A45|1084| ~ J99|122|	Helicobacter_outer_membrane_protein	E48
11	1	1	GI:409893291 ~ GI:443621056 ~ GI:4154638	26695|125| ~ A45|1082| ~ J99|124|	hypothetical_protein	E48
6	0	0	GI:409894703 ~ GI:443620750 ~ GI:4156092	26695|1525| ~ A45|779| ~ J99|1471|	putative_bifunctional_cbb3-type_cytochrome_c_oxidase_subunit_II/cytochrome_c	E48
3	0	0	GI:409894501 ~ GI:443620613 ~ GI:4155861	26695|1334| ~ A45|641| ~ J99|1266|	transport_protein_TonB	E48
2	0	0	GI:409894043 ~ GI:443621503 ~ GI:4155385	26695|885| ~ A45|1526| ~ J99|836|	Ribitol_2-dehydrogenase ~ Putative_oxidoreductase_SadH	E48
2	0	0	GI:409893466 ~ GI:443620957	26695|295| ~ A45|986|	Dipeptide_transport_system_permease_protein_DppC	E48
3	0	0	NA	26695|1409| ~ J99|1322|	Phosphoethanolamine_transferase_CptA	E48
5	0	0	GI:409894569 ~ GI:443620222 ~ GI:4155907	26695|1398| ~ A45|272| ~ J99|1306|	Biotin_synthase	E48
2	0	0	GI:409893653 ~ GI:443621487 ~ GI:4154991	26695|489| ~ A45|1512| ~ J99|456|	Neuraminyllactose-binding_hemagglutinin_precursor_(NLBH)	E48
5	0	0	NA ~ GI:4155030	26695|529| ~ J99|493|	CAG_pathogenicity_island_protein_12_precursor	E48
1	0	0	GI:409894267 ~ GI:443620244 ~ GI:4155630	26695|1110| ~ A45|291| ~ J99|1048|	Helicobacter_outer_membrane_protein	E48
10	2	1	GI:409894328 ~ GI:443620300 ~ GI:4155688	26695|1169| ~ A45|343| ~ J99|1107|	ABC_transporter_glutamine-binding_protein_GlnH_precursor	E48
9	1	1	GI:409893166 ~ GI:443620803 ~ GI:4154506	26695|3| ~ A45|835| ~ J99|3|	2-dehydro-3-deoxyphosphooctonate_aldolase	E48
1	0	0	GI:409893169 ~ GI:443620806 ~ GI:4154509	26695|6| ~ A45|838| ~ J99|6|	Pantothenate_synthetase	E48
1	0	0	NA	A45|940|	hypothetical_protein	E48
10	0	0	GI:409894476 ~ GI:443620588 ~ GI:4155813	26695|1309| ~ A45|615| ~ J99|1243|	hypothetical_protein	E48
8	0	0	GI:409893357 ~ GI:443620998 ~ GI:4154700	26695|190| ~ A45|1024| ~ J99|187|	Enoyl-[acyl-carrier-protein]_reductase_[NADH]_FabI	E48
5	1	1	GI:409893176 ~ GI:443620001 ~ GI:4154514	26695|12| ~ A45|66| ~ J99|12|	hypothetical_protein	E48
4	0	0	GI:409894542 ~ GI:443620218 ~ GI:4155901	26695|1373| ~ A45|268| ~ J99|1302|	Arogenate_dehydrogenase	E48
5	0	0	GI:409893563 ~ GI:443620477 ~ GI:4155562	26695|392| ~ A45|510| ~ J99|990|	4-hydroxy-3-methylbut-2-enyl_diphosphate_reductase	E48
4	0	0	GI:409894139 ~ GI:443620439 ~ GI:4155504	26695|980| ~ A45|477| ~ J99|927|	Small-conductance_mechanosensitive_channel	E48
1	0	0	GI:409894149 ~ GI:443620728	26695|990| ~ A45|757|	hypothetical_protein	E48
14	0	0	GI:409893752 ~ GI:443621413 ~ GI:4155085	26695|588| ~ A45|1441| ~ J99|551|	2-oxoglutarate_oxidoreductase_subunit_KorB	E48
2	0	0	NA ~ GI:4155042	26695|553| ~ A45|1475| ~ J99|514|	hypothetical_protein	E48
4	1	1	GI:409893979 ~ GI:443621183 ~ GI:4155330	26695|823| ~ A45|1205| ~ J99|778|	Lipooligosaccharide_biosynthesis_protein_lex-1 ~ Glycosyltransferase_family_25_(LPS_biosynthesis_protein)	E48
4	0	0	GI:409893809 ~ GI:443621355 ~ GI:4155134	26695|646| ~ A45|1381| ~ J99|604|	UTP--glucose-1-phosphate_uridylyltransferase	E48
13	2	2	GI:409893864 ~ GI:443621302 ~ GI:4155198	26695|704| ~ A45|1326| ~ J99|659|	Helicobacter_outer_membrane_protein	E48
0	1	1	GI:409893727 ~ GI:443621439 ~ GI:4155052	26695|563| ~ A45|1466| ~ J99|524|	Diaminopimelate_epimerase	E48
1	1	1	GI:443620260 ~ GI:4155647	A45|306| ~ J99|1065|	hypothetical_protein	E48
13	1	0	GI:409894730 ~ GI:443620776 ~ GI:4156104	26695|1551| ~ A45|805| ~ J99|1482|	D-methionine-binding_lipoprotein_MetQ_precursor	E48
1	0	0	GI:409894627 ~ GI:443620626 ~ GI:4155969	26695|1454| ~ A45|652| ~ J99|1365|	virulence_factor_Mce_family_protein	E48
4	0	0	GI:409894591 ~ GI:443620060 ~ GI:4155935	26695|1423| ~ A45|126| ~ J99|1332|	Ribosomal_RNA_small_subunit_methyltransferase_A	E48
7	0	0	GI:409894536 ~ GI:443620212 ~ GI:4155893	26695|1368| ~ A45|262| ~ J99|1296|	Acyl-[acyl-carrier-protein]--UDP-N-_acetylglucosamine_O-acyltransferase	E48
10	0	0	GI:409893833 ~ GI:443621333 ~ GI:4155167	26695|671| ~ A45|1357| ~ J99|628|	Helicobacter_outer_membrane_protein	E48
4	1	1	GI:443621319 ~ GI:4155184	A45|1343| ~ J99|642|	DNA_polymerase_II ~ putative_3'-5'_exonuclease_related_to_the_exonuclease_domain_of_PolB	E48
2	0	0	GI:409894213 ~ GI:443620871 ~ GI:4154887	26695|1057| ~ A45|902| ~ J99|377|	3-methyl-2-oxobutanoate_hydroxymethyltransferase	E48
12	0	0	GI:409893498 ~ GI:443620927 ~ GI:4154852	26695|325| ~ A45|957| ~ J99|324|	Cell_division_inhibitor_MinD	E48
4	0	0	GI:409893468 ~ GI:443620955 ~ GI:4154801	26695|297| ~ A45|984| ~ J99|296|	Stage_0_sporulation_protein_KE	E48
1	0	0	GI:409894614 ~ GI:443620701 ~ GI:4155956	26695|1441| ~ A45|730| ~ J99|1352|	hypothetical_protein	E48
2	2	2	GI:409893705 ~ GI:4155025	26695|539| ~ J99|502|	hypothetical_protein	E48
7	2	1	GI:409893347 ~ GI:443620991 ~ GI:4154688	26695|180| ~ A45|1017| ~ J99|179|	hypothetical_protein ~ cell_division_protein_ZipA	E48
2	0	0	GI:409893904 ~ GI:4155240	26695|747| ~ J99|701|	cell_division_ABC_transporter_subunit_FtsX	E48
0	1	1	GI:409894518 ~ GI:443620198 ~ GI:4155876	26695|1350| ~ A45|248| ~ J99|1282|	Phosphatidylserine_decarboxylase_proenzyme	E48
8	0	0	GI:409894084 ~ GI:443620390 ~ GI:4155443	26695|926| ~ A45|426| ~ J99|877|	5'-nucleotidase_SurE	E48
10	0	0	GI:409894114 ~ GI:443620417 ~ GI:4155457	26695|954| ~ A45|453| ~ J99|904|	Putative_zinc_ribbon_domain_protein	E48
1	0	0	GI:409893500 ~ GI:443620925 ~ GI:4154854	26695|327| ~ A45|955| ~ J99|326|	DNA_protecting_protein_DprA	E48
14	1	1	GI:409893396 ~ GI:443620099 ~ GI:4154742	26695|227| ~ A45|158| ~ J99|224|	disulfide_isomerase/thiol-disulfide_oxidase	E48
4	0	0	GI:409893227 ~ GI:443621118 ~ GI:4154570	26695|65| ~ A45|1141| ~ J99|65|	Urease_accessory_protein_UreH	E48
4	0	0	GI:409894422 ~ GI:443620530 ~ GI:4155793	26695|1256| ~ A45|558| ~ J99|1191|	NAD(P)H-quinone_oxidoreductase_subunit_J	E48
17	0	0	GI:409894719 ~ GI:443620766 ~ GI:4156073	26695|1541| ~ A45|795| ~ J99|1455|	Vegetative_protein_209	E48
5	0	0	GI:409894294 ~ GI:443620271 ~ GI:4155660	26695|1137| ~ A45|317| ~ J99|1076|	Sporulation_initiation_inhibitor_protein_soj	E48
2	0	0	GI:443620326 ~ GI:4155667	A45|369| ~ J99|1081|	NYN_domain_protein	E48
1	0	0	GI:409894437 ~ GI:443620546 ~ GI:4155802	26695|1271| ~ A45|576| ~ J99|1206|	Tryptophan_synthase_alpha_chain	E48
1	0	0	GI:409893986 ~ GI:443621177 ~ GI:4155336	26695|829| ~ A45|1199| ~ J99|784|	Spermidine_synthase	E48
3	0	0	GI:409894751 ~ GI:443620796 ~ GI:4156115	26695|1572| ~ A45|827| ~ J99|1502|	Distal_rod_protein	E48
8	0	0	GI:409894169 ~ GI:443620828 ~ GI:4154942	26695|1013| ~ A45|859| ~ J99|419|	Enoyl-[acyl-carrier-protein]_reductase_[NADPH]_FabL	E48
14	0	0	GI:409894748 ~ GI:443620793 ~ GI:4156112	26695|1569| ~ A45|824| ~ J99|1499|	Pyridoxine_5'-phosphate_synthase	E48
2	0	0	GI:409894628 ~ GI:443620627 ~ GI:4155970	26695|1455| ~ A45|653| ~ J99|1366|	Methionine_import_ATP-binding_protein_MetN_2	E48
2	0	0	GI:409893584 ~ GI:443620494 ~ GI:4155549	26695|411| ~ A45|525| ~ J99|974|	tRNA_(mo5U34)-methyltransferase	E48
1	0	0	GI:409893263 ~ GI:443621082 ~ GI:4154602	26695|99| ~ A45|1106| ~ J99|100|	PGL/p-HBAD_biosynthesis_glycosyltransferase/MT3031	E48
13	0	0	GI:409893950 ~ GI:443621213 ~ GI:4155289	26695|793| ~ A45|1234| ~ J99|746|	Neuraminyllactose-binding_hemagglutinin_precursor_(NLBH)	E48
1	0	0	GI:409893998 ~ GI:443621164 ~ GI:4155339	26695|842| ~ A45|1187| ~ J99|796|	Hydroxyethylthiazole_kinase	E48
1	0	0	NA	26695|693|	hypothetical_protein	E48
3	0	0	GI:409894622 ~ GI:443620621 ~ GI:4155973	26695|1449| ~ A45|647| ~ J99|1360|	Ribosomal_large_subunit_pseudouridine_synthase_B	E48
1	0	0	GI:409893969 ~ GI:443621194 ~ GI:4155316	26695|813| ~ A45|1215| ~ J99|765|	Chemotaxis_protein_MotB	E48
6	0	0	GI:409894095 ~ GI:443620400 ~ GI:4155451	26695|936| ~ A45|436| ~ J99|887|	putative_amino-acid_ABC_transporter-binding_protein_precursor	E48
5	0	0	GI:409894313 ~ GI:443620314 ~ GI:4155682	26695|1155| ~ A45|357| ~ J99|1093|	Pyrroline-5-carboxylate_reductase	E48
5	0	0	GI:409893968 ~ GI:443621195 ~ GI:4155315	26695|812| ~ A45|1216| ~ J99|764|	Chemotaxis_protein_PomA	E48
18	0	0	GI:409894755 ~ GI:409894756 ~ GI:443620799 ~ GI:443620800 ~ GI:4156123	26695|1575| ~ 26695|1576| ~ A45|831| ~ A45|832| ~ J99|1504|	Ubiquinol-cytochrome_C_chaperone	E48
5	0	0	GI:409894271 ~ GI:443620249 ~ GI:4155634	26695|1114| ~ A45|295| ~ J99|1053|	Putative_beta-lactamase_HcpC_precursor	E48
3	0	0	GI:409893355 ~ GI:443620996 ~ GI:4154698	26695|188| ~ A45|1022| ~ J99|185|	Fumarate_reductase_cytochrome_b_subunit	E48
2	3	2	GI:409893625 ~ GI:443620819 ~ GI:4154954	26695|460| ~ A45|850| ~ J99|429|	Tellurite_resistance_protein_TerB	E48
2	0	0	GI:409893300 ~ GI:443621048 ~ GI:4154634	26695|133| ~ A45|1074| ~ J99|132|	Lactate_utilization_protein_A	E48
5	0	0	GI:409893669 ~ GI:443621471 ~ GI:4155000	26695|507| ~ A45|1499| ~ J99|472|	4-hydroxy-tetrahydrodipicolinate_reductase	E48
2	0	0	GI:409893326	26695|159|	Sensor_protein_PfeS	E48
3	0	0	GI:409894459 ~ GI:443620571 ~ GI:4155829	26695|1293| ~ A45|599| ~ J99|1227|	Methionine_aminopeptidase_1	E48
1	0	0	GI:409894340 ~ GI:443620287 ~ GI:4155705	26695|1178| ~ A45|332| ~ J99|1116|	tRNA_2-thiocytidine_biosynthesis_protein_TtcA	E48
4	1	0	GI:409893331 ~ GI:443621018 ~ GI:4154672	26695|165| ~ A45|1044| ~ J99|162|	hypothetical_protein	E48
5	0	0	GI:409893692 ~ GI:4155010	26695|527| ~ J99|491|	VirB8_protein	E48
1	0	0	GI:409893557 ~ GI:443620471 ~ GI:4155572	26695|386| ~ A45|504| ~ J99|996|	UDP-2,3-diacylglucosamine_hydrolase	E48
9	4	3	GI:409893485 ~ GI:443620941 ~ GI:4154832	26695|312| ~ A45|971| ~ J99|310|	heme_oxygenase,_HugZ_family	E48
1	0	0	GI:409894187 ~ GI:443620845 ~ GI:4154925	26695|1031| ~ A45|876| ~ J99|402|	Sigma-F_factor	E48
1	0	0	GI:409893521 ~ GI:4155614	26695|350| ~ J99|1031|	NADP-dependent_3-hydroxy_acid_dehydrogenase_YdfG	E48
2	0	0	GI:409893375 ~ GI:443620980 ~ GI:4154718	26695|208| ~ A45|1006| ~ J99|204|	Beta-lactamase_HcpA_precursor	E48
3	1	0	GI:409894690 ~ GI:443620688 ~ GI:4156036	26695|1515| ~ A45|718| ~ J99|1423|	Exodeoxyribonuclease	E48
4	0	0	GI:409893229 ~ GI:443621116 ~ GI:4154572	26695|67| ~ A45|1139| ~ J99|67|	Urease_accessory_protein_UreF	E48
8	1	1	GI:409893576 ~ GI:443620488 ~ GI:4155554	26695|403| ~ A45|520| ~ J99|979|	Neuraminyllactose-binding_hemagglutinin_precursor_(NLBH)	E48
1	0	0	GI:409894070	26695|913|	Brucella_heme_uptake_protein_A	E48
1	0	0	GI:409894327 ~ GI:443620301 ~ GI:4155696	26695|1168| ~ A45|344| ~ J99|1106|	Arginine_transport_ATP-binding_protein_ArtM	E48
7	2	1	GI:409894632 ~ GI:443620632 ~ GI:4155980	26695|1459| ~ A45|657| ~ J99|1370|	Helicobacter_outer_membrane_protein	E48
5	0	0	GI:409894345 ~ GI:443620283 ~ GI:4155711	26695|1182| ~ A45|328| ~ J99|1120|	Carbonic_anhydrase_precursor	E48
8	1	1	GI:409893722 ~ GI:443621444 ~ GI:4155047	26695|558| ~ A45|1471| ~ J99|519|	3-oxoacyl-[acyl-carrier-protein]_reductase_FabG	E48
2	1	1	GI:409894647 ~ GI:443620647 ~ GI:4155985	26695|1473| ~ A45|671| ~ J99|1384|	Demethylmenaquinone_methyltransferase	E48
9	0	0	GI:409893353 ~ GI:443620994 ~ GI:4154696	26695|186| ~ A45|1020| ~ J99|183|	Fumarate_reductase_iron-sulfur_subunit	E48
0	1	1	GI:409893491 ~ GI:443620935 ~ GI:4154827	26695|318| ~ A45|965| ~ J99|316|	Helicobacter_outer_membrane_protein	E48
7	0	0	GI:409894032 ~ GI:443620168 ~ GI:4155375	26695|876| ~ A45|224| ~ J99|825|	hypothetical_protein ~ NYN_domain_protein	E48
5	2	1	GI:409894559 ~ GI:443620738 ~ GI:4156054	26695|1388| ~ A45|767| ~ J99|1441|	Helicobacter_outer_membrane_protein	E48
9	0	0	GI:409894053 ~ GI:443621511 ~ GI:4155406	26695|894| ~ A45|1532| ~ J99|848|	Hydrogenase/urease_nickel_incorporation_protein_HypB	E48
1	1	1	GI:409893894 ~ GI:443621267 ~ GI:4155221	26695|737| ~ A45|1293| ~ J99|691|	acetoin_dehydrogenase_E2_subunit_dihydrolipoyllysine-residue_acetyltransferase	E48
3	0	0	GI:409893871 ~ GI:443621292 ~ GI:4155205	26695|713| ~ A45|1317| ~ J99|667|	Lipopolysaccharide_export_system_ATP-binding_protein_LptB	E48
3	0	0	GI:409893324 ~ GI:443621025 ~ GI:4154662	26695|157| ~ A45|1051| ~ J99|155|	putative_transcriptional_regulatory_protein	E48
1	0	0	GI:409894508 ~ GI:443620187 ~ GI:4155881	26695|1341| ~ A45|238| ~ J99|1273|	2-acyl-glycerophospho-ethanolamine_acyltransferase ~ 1-acyl-sn-glycerol-3-phosphate_acyltransferase	E48
7	0	0	GI:409893931 ~ GI:443621231 ~ GI:4155270	26695|774| ~ A45|1252| ~ J99|728|	Uridylate_kinase	E48
2	0	0	GI:409894212 ~ GI:443620870 ~ GI:4154908	26695|1056| ~ A45|901| ~ J99|378|	hypothetical_protein	E48
20	0	0	GI:409893234 ~ GI:443621111 ~ GI:4154577	26695|71| ~ A45|1135| ~ J99|71|	Urease_subunit_alpha	E48
8	2	2	GI:409893258 ~ GI:443621087 ~ GI:4154597	26695|94| ~ A45|1111| ~ J99|95|	hypothetical_protein	E48
1	0	0	GI:409893343 ~ GI:443620987 ~ GI:4154684	26695|176| ~ A45|1013| ~ J99|175|	Colicin_V_production_protein	E48
10	0	0	GI:409894473 ~ GI:443620585 ~ GI:4155825	26695|1306| ~ A45|612| ~ J99|1240|	hypothetical_protein	E48
3	0	0	GI:409893356 ~ GI:443620997 ~ GI:4154699	26695|189| ~ A45|1023| ~ J99|186|	Triosephosphate_isomerase	E48
8	0	0	GI:409894360 ~ GI:443620337 ~ GI:4155721	26695|1196| ~ A45|377| ~ J99|1132|	50S_ribosomal_protein_L1	E48
2	0	0	GI:409894335 ~ GI:443620291 ~ GI:4155701	26695|1174| ~ A45|336| ~ J99|1112|	Purine_nucleoside_phosphorylase_DeoD-type	E48
8	0	0	GI:409893851 ~ GI:443621317 ~ GI:4155186	26695|690| ~ A45|1341| ~ J99|651|	Succinyl-CoA:3-ketoacid_coenzyme_A_transferase_subunit_A	E48
8	0	0	GI:409893307 ~ GI:443621042 ~ GI:4154643	26695|140| ~ A45|1068| ~ J99|138|	cbb3-type_cytochrome_c_oxidase_subunit_II	E48
3	0	0	GI:409893250 ~ GI:443621095 ~ GI:4154592	26695|86| ~ A45|1119| ~ J99|85|	MTA/SAH_nucleosidase	E48
10	1	1	GI:409894445 ~ GI:443620555 ~ GI:4155809	26695|1279| ~ A45|585| ~ J99|1213|	Outer_membrane_protein_P4	E48
2	0	0	GI:409894377 ~ GI:443620359 ~ GI:4155748	26695|1214| ~ A45|397| ~ J99|1149|	ABC_transporter_ATP-binding_protein_YtrB	E48
3	0	0	GI:409893802 ~ GI:443621363 ~ GI:4155143	26695|639| ~ A45|1391| ~ J99|596|	7-cyano-7-deazaguanine_synthase	E48
1	0	0	GI:409893932 ~ GI:443621230 ~ GI:4155271	26695|775| ~ A45|1251| ~ J99|729|	hypothetical_protein	E48
6	0	0	GI:409893168 ~ GI:443620805 ~ GI:4154508	26695|5| ~ A45|837| ~ J99|5|	Orotidine_5'-phosphate_decarboxylase	E48
2	1	1	GI:409893715 ~ GI:443621451 ~ GI:4155040	26695|551| ~ A45|1477| ~ J99|512|	Putative_TrmH_family_tRNA/rRNA_methyltransferase	E48
8	0	0	GI:409894256 ~ GI:443620232 ~ GI:4155608	26695|1099| ~ A45|280| ~ J99|1036|	6-phosphogluconolactonase	E48
2	0	0	GI:409893537 ~ GI:443620450 ~ GI:4155595	26695|366| ~ A45|484| ~ J99|1016|	Ribosomal_RNA_small_subunit_methyltransferase_E	E48
2	0	0	GI:409893982 ~ GI:443621181 ~ GI:4155332	26695|825| ~ A45|1203| ~ J99|780|	F-ATPase_subunit_6	E48
1	0	0	NA	26695|628|	Putative_beta-lactamase_HcpD_precursor	E48
4	2	2	GI:409894626 ~ GI:443620625 ~ GI:4155968	26695|1453| ~ A45|651| ~ J99|1364|	hypothetical_protein	E48
6	0	0	GI:409893327 ~ GI:443621022 ~ GI:4154653	26695|161| ~ A45|1048| ~ J99|158|	Response_regulator_ArlR	E48
10	1	1	GI:409893770 ~ GI:443621396 ~ GI:4155091	26695|605| ~ A45|1425| ~ J99|566|	Cation_efflux_system_protein_CzcB	E48
2	0	0	GI:409893903 ~ GI:443621257 ~ GI:4155239	26695|746| ~ A45|1284| ~ J99|700|	Lipoprotein-releasing_system_ATP-binding_protein_LolD ~ Bacitracin_export_ATP-binding_protein_BceA	E48
8	0	0	GI:409894198 ~ GI:443620856 ~ GI:4154918	26695|1042| ~ A45|887| ~ J99|391|	Transcriptional_regulatory_protein_CusR	E48
2	1	1	GI:409894261 ~ GI:443620237 ~ GI:4155623	26695|1104| ~ A45|285| ~ J99|1042|	Helicobacter_outer_membrane_protein	E48
4	0	0	GI:409893540 ~ GI:443620453 ~ GI:4155588	26695|369| ~ A45|487| ~ J99|1013|	Thioredoxin-related_protein	E48
1	0	0	GI:409894155 ~ GI:443620719 ~ GI:443620015 ~ GI:4155515	26695|996| ~ A45|747| ~ A45|77| ~ J99|948|	ParA-like_protein	E48
1	0	0	GI:409894674 ~ GI:443620674 ~ GI:4156023	26695|1498| ~ A45|700| ~ J99|1409|	G3P_acyltransferase	E48
2	0	0	GI:409894540 ~ GI:443620216 ~ GI:4155904	26695|1371| ~ A45|266| ~ J99|1300|	outer_membrane_assembly_lipoprotein_YfiO	E48
5	0	0	GI:409894428 ~ GI:443620536 ~ GI:4155779	26695|1262| ~ A45|564| ~ J99|1197|	NADH-quinone_oxidoreductase_subunit_I	E48
3	0	0	GI:443620391 ~ GI:4155433	A45|427| ~ J99|878|	hypothetical_protein	E48
3	0	0	GI:409894017 ~ GI:443620153 ~ GI:4155362	26695|861| ~ A45|209| ~ J99|811|	hypothetical_protein	E48
2	0	0	GI:409893693 ~ GI:4155029	26695|528| ~ J99|492|	hypothetical_protein	E48
3	3	2	GI:409893805 ~ GI:4155146	26695|642| ~ J99|600|	Putative_NAD(P)H_nitroreductase_YfkO	E48
2	0	0	GI:409893436 ~ GI:443620129 ~ GI:4154776	26695|265| ~ A45|185| ~ J99|263|	hypothetical_protein	E48
1	0	0	GI:409893529 ~ GI:443619970 ~ GI:4155599	26695|358| ~ A45|34| ~ J99|1023|	hypothetical_protein	E48
1	0	0	GI:409893726 ~ GI:443621440 ~ GI:4155051	26695|562| ~ A45|1467| ~ J99|523|	Inner_membrane_protein_YkgB	E48
2	0	0	GI:409893397 ~ GI:443620098 ~ GI:4154743	26695|228| ~ A45|157| ~ J99|225|	hypothetical_protein	E48
1	0	0	GI:409894743 ~ GI:443620789 ~ GI:4156119	26695|1564| ~ A45|818| ~ J99|1495|	D-methionine_transport_system_permease_protein_MetI	E48
9	0	0	GI:409894478 ~ GI:443620590 ~ GI:4155815	26695|1311| ~ A45|617| ~ J99|1245|	50S_ribosomal_protein_L4	E48
1	0	0	GI:409893341 ~ GI:443620985 ~ GI:4154682	26695|174| ~ A45|1011| ~ J99|173|	Lipoprotein-releasing_system_ATP-binding_protein_LolD	E48
17	0	0	GI:409893552 ~ GI:443620466 ~ GI:4155578	26695|381| ~ A45|499| ~ J99|1001|	Superoxide_dismutase_[Fe]	E48
6	0	0	GI:409893759 ~ GI:4155094	26695|594| ~ J99|556|	tumor_necrosis_factor_alpha-inducing_protein	E48
2	0	0	GI:443620963	A45|992|	Aliphatic_amidase	E48
4	0	0	GI:409893298 ~ GI:443621050 ~ GI:4154632	26695|131| ~ A45|1076| ~ J99|130|	Lactate_utilization_protein_C	E48
10	0	0	GI:409894620 ~ GI:443620619 ~ GI:4155962	26695|1447| ~ A45|645| ~ J99|1358|	putative_lipoprotein	E48
8	0	0	GI:409894110 ~ GI:443620413 ~ GI:4155469	26695|950| ~ A45|449| ~ J99|900|	Oxygen-insensitive_NADPH_nitroreductase	E48
1	0	0	GI:443619956	A45|21|	thiamine_biosynthesis_protein_ThiF	E48
1	0	0	GI:409893923 ~ GI:443621238 ~ GI:4155272	26695|766| ~ A45|1261| ~ J99|720|	putative_molybdenum_cofactor_guanylyltransferase	E48
1	0	0	GI:409894733 ~ GI:443620779 ~ GI:4156107	26695|1554| ~ A45|808| ~ J99|1485|	putative_GTP-binding_protein_EngB	E48
3	0	0	GI:409894697 ~ GI:443620694 ~ GI:4156042	26695|1521| ~ A45|724| ~ J99|1429|	Thymidylate_synthase_ThyX	E48
5	0	0	GI:409894253 ~ GI:443620229 ~ GI:4155605	26695|1096| ~ A45|277| ~ J99|1033|	KHG/KDPG_aldolase	E48
15	0	0	GI:409894454 ~ GI:443620566 ~ GI:4155842	26695|1288| ~ A45|595| ~ J99|1222|	30S_ribosomal_protein_S4	E48
4	1	1	GI:409893383 ~ GI:443620974 ~ GI:4154716	26695|215| ~ A45|1000| ~ J99|212|	putative_kinase_inhibitor_protein	E48
2	0	0	GI:409893707 ~ GI:4155027	26695|541| ~ J99|504|	hypothetical_protein	E48
5	0	0	GI:409893852 ~ GI:443621316 ~ GI:4155187	26695|691| ~ A45|1340| ~ J99|650|	Succinyl-CoA:3-ketoacid_coenzyme_A_transferase_subunit_B	E48
3	1	1	GI:409894586 ~ GI:443620055 ~ GI:4155930	26695|1416| ~ A45|119| ~ J99|1329|	hypothetical_protein	E48
3	0	0	GI:409893488 ~ GI:443620938 ~ GI:4154835	26695|315| ~ A45|968| ~ J99|313|	Guanylate_kinase	E48
3	0	0	GI:409893966 ~ GI:443621197 ~ GI:4155325	26695|810| ~ A45|1218| ~ J99|762|	putative_polyketide_biosynthesis_zinc-dependent_hydrolase_PksB	E48
4	0	0	GI:409893991 ~ GI:443621171 ~ GI:4155343	26695|835| ~ A45|1194| ~ J99|789|	hypothetical_protein	E48
1	0	0	GI:409894483 ~ GI:443620595 ~ GI:4155855	26695|1316| ~ A45|623| ~ J99|1250|	Ribonuclease_HII	E48
4	0	0	GI:409893286 ~ GI:443621061 ~ GI:4154622	26695|120| ~ A45|1087| ~ J99|119|	Translation_initiation_factor_IF-3	E48
1	0	0	GI:409894170 ~ GI:443620829 ~ GI:4154943	26695|1014| ~ A45|860| ~ J99|418|	hypothetical_protein	E48
2	0	0	NA	A45|75|	Helicobacter_outer_membrane_protein	E48
5	0	0	GI:409894416 ~ GI:443620525 ~ GI:4155788	26695|1250| ~ A45|553| ~ J99|1186|	Orotate_phosphoribosyltransferase	E48
7	0	0	GI:443621172 ~ GI:4155342	A45|1195| ~ J99|788|	hypothetical_protein	E48
1	0	0	GI:409893781 ~ GI:443621384 ~ NA	26695|618| ~ A45|1413| ~ J99|576|	Glycosyltransferase_family_25_(LPS_biosynthesis_protein)	E48
1	1	1	GI:409894414 ~ GI:443620523 ~ GI:4155798	26695|1248| ~ A45|551| ~ J99|1184|	Preprotein_translocase_band_1_subunit	E48
1	0	0	GI:409894087 ~ GI:443620392 ~ GI:4155434	26695|929| ~ A45|428| ~ J99|879|	queuosine_biosynthesis_protein_QueD	E48
9	0	0	GI:409893228 ~ GI:443621117 ~ GI:4154571	26695|66| ~ A45|1140| ~ J99|66|	Urease_accessory_protein_UreG	E48
2	0	0	GI:409893696 ~ GI:4155031	26695|531| ~ J99|494|	CAG_pathogenicity_island_protein_13	E48
5	0	0	GI:409893687 ~ GI:4155006	26695|523| ~ J99|487|	CagZ	E48
18	0	0	GI:409894729 ~ GI:443620775 ~ GI:4156103	26695|1550| ~ A45|804| ~ J99|1481|	putative_peroxiredoxin	E48
1	0	0	GI:409894735 ~ GI:443620781 ~ GI:4156097	26695|1556| ~ A45|810| ~ J99|1487|	hypothetical_protein	E48
1	0	0	GI:409893312 ~ GI:443621037 ~ GI:4154647	26695|145| ~ A45|1063| ~ J99|143|	hypothetical_protein	E48
6	0	0	GI:409893947 ~ GI:443621216 ~ GI:4155294	26695|790| ~ A45|1237| ~ J99|743|	ATP-dependent_Clp_protease_proteolytic_subunit	E48
1	0	0	GI:409893985 ~ GI:443621178 ~ GI:4155335	26695|828| ~ A45|1200| ~ J99|783|	Dephospho-CoA_kinase	E48
1	0	0	GI:409893570 ~ GI:443620484 ~ GI:4155568	26695|398| ~ A45|516| ~ J99|984|	hypothetical_protein	E48
2	0	0	GI:409893313 ~ GI:443621036 ~ GI:4154648	26695|146| ~ A45|1062| ~ J99|144|	hypothetical_protein	E48
3	0	0	GI:409894625 ~ GI:443620624 ~ GI:4155967	26695|1452| ~ A45|650| ~ J99|1363|	META_domain_protein	E48
3	2	1	GI:409893793 ~ GI:443621371 ~ GI:4155125	26695|630| ~ A45|1401| ~ J99|587|	Modulator_of_drug_activity_B	E48
1	0	0	NA	A45|1399|	Quinone-reactive_Ni/Fe-hydrogenase_small_chain_precursor	E48
1	0	0	GI:409894079 ~ GI:443620385 ~ GI:4155437	26695|921| ~ A45|421| ~ J99|870|	Recombination_protein_RecR	E48
2	1	1	GI:409894010 ~ GI:443620146 ~ GI:4155355	26695|854| ~ A45|202| ~ J99|804|	Phosphoheptose_isomerase_1	E48
1	0	0	GI:409894482 ~ GI:443620594 ~ GI:4155854	26695|1315| ~ A45|622| ~ J99|1249|	hypothetical_protein	E48
2	0	0	GI:409893955 ~ GI:443621208 ~ GI:4155308	26695|798| ~ A45|1229| ~ J99|751|	GTP_cyclohydrolase-2	E48
4	0	0	GI:409894479 ~ GI:443620591 ~ GI:4155816	26695|1312| ~ A45|618| ~ J99|1246|	50S_ribosomal_protein_L3	E48
1	0	0	GI:409894637 ~ GI:443620637 ~ GI:4155994	26695|1464| ~ A45|662| ~ J99|1375|	Thymidylate_kinase	E48
1	0	0	GI:409893272 ~ GI:443621073 ~ GI:4154609	26695|107| ~ A45|1098| ~ J99|108|	HSP-70_cofactor	E48
8	0	0	GI:409893780 ~ GI:443621385 ~ GI:4155112	26695|617| ~ A45|1414| ~ J99|574|	Adenylate_kinase	E48
1	0	0	GI:409893183 ~ GI:443620008 ~ GI:4154521	26695|19| ~ A45|73| ~ J99|19|	lipid_A_1-phosphatase	E48
2	0	0	GI:409894285 ~ GI:443620262 ~ GI:4155649	26695|1128| ~ A45|308| ~ J99|1067|	Biopolymer_transport_protein_ExbB	E48
1	0	0	GI:409893504 ~ GI:443620920 ~ GI:4154857	26695|332| ~ A45|951| ~ J99|331|	hypothetical_protein	E48
7	1	0	GI:409894109 ~ GI:443620412 ~ GI:4155468	26695|949| ~ A45|448| ~ J99|899|	hypothetical_protein	E48
4	0	0	GI:409893535 ~ GI:443620448 ~ GI:4155593	26695|364| ~ A45|482| ~ J99|1018|	Deoxycytidine_triphosphate_deaminase	E48
1	0	0	GI:409894639 ~ GI:443620639 ~ GI:4155996	26695|1466| ~ A45|664| ~ J99|1377|	putative_aromatic_acid_decarboxylase	E48
7	0	0	GI:409893339 ~ GI:443621010 ~ GI:4154668	26695|172| ~ A45|1037| ~ J99|169|	Elongation_factor_P	E48
8	1	1	GI:409894262 ~ GI:443620239 ~ GI:4155624	26695|1105| ~ A45|286| ~ J99|1043|	Pyruvate_synthase_subunit_PorC	E48
11	0	0	GI:409893631 ~ GI:443620813 ~ GI:4154960	26695|466| ~ A45|844| ~ J99|435|	Helicobacter_outer_membrane_protein	E48
3	1	1	GI:409893753 ~ GI:443621412 ~ GI:4155077	26695|589| ~ A45|1440| ~ J99|552|	2-oxoglutarate-acceptor_oxidoreductase_subunit_OorC	E48
2	0	0	GI:409893442 ~ GI:443620123 ~ GI:4154782	26695|271| ~ A45|179| ~ J99|269|	Indole-3-glycerol_phosphate_synthase	E48
2	0	0	GI:409894415 ~ GI:443620524 ~ GI:4155787	26695|1249| ~ A45|552| ~ J99|1185|	Ribosome-releasing_factor	E48
3	1	1	GI:409894279 ~ GI:443620256 ~ GI:4155643	26695|1121| ~ A45|302| ~ J99|1061|	FKBP-type_peptidyl-prolyl_cis-trans_isomerase_SlyD	E48
7	0	0	GI:409894329 ~ GI:443620299 ~ GI:4155689	26695|1170| ~ A45|342| ~ J99|1108|	hypothetical_protein	E48
1	0	0	GI:409894734 ~ GI:443620780 ~ GI:4156096	26695|1555| ~ A45|809| ~ J99|1486|	lipopolysaccharide_transport_periplasmic_protein_LptA	E48
11	2	2	GI:409893471 ~ GI:443620952 ~ GI:4154822	26695|300| ~ A45|981| ~ J99|299|	YceI-like_domain_protein ~ hypothetical_protein	E48
4	0	0	GI:409894393 ~ GI:443620376 ~ GI:4155756	26695|1230| ~ A45|413| ~ J99|1165|	hypothetical_protein	E48
5	0	0	GI:409893962 ~ GI:443621201 ~ GI:4155301	26695|805| ~ A45|1222| ~ J99|758|	flagellar_basal_body-associated_protein_FliL	E48
1	0	0	GI:409894037 ~ GI:443621495 ~ GI:4155386	26695|878| ~ A45|1519| ~ J99|828|	Holliday_junction_ATP-dependent_DNA_helicase_RuvA	E48
6	0	0	GI:409894446 ~ GI:443620556 ~ GI:4155810	26695|1280| ~ A45|586| ~ J99|1214|	hypothetical_protein	E48
8	0	0	GI:409894467 ~ GI:443620579 ~ GI:4155819	26695|1300| ~ A45|606| ~ J99|1234|	50S_ribosomal_protein_L5	E48
1	0	0	GI:409894404 ~ GI:443620512 ~ GI:4155774	26695|1238| ~ A45|541| ~ J99|1174|	Helix-destabilizing_protein	E48
5	0	0	GI:409893346 ~ GI:443620990 ~ GI:4154687	26695|179| ~ A45|1016| ~ J99|178|	hypothetical_protein	E48
6	1	1	GI:409894290 ~ GI:443620267 ~ GI:4155640	26695|1133| ~ A45|313| ~ J99|1072|	F0F1_ATP_synthase_subunit_delta	E48
7	0	0	GI:409893490 ~ GI:443620936 ~ GI:4154837	26695|317| ~ A45|966| ~ J99|315|	putative_cardiolipin_synthase_YwiE	E48
1	0	0	GI:409893675 ~ GI:443621462 ~ GI:4155004	26695|513| ~ A45|1488| ~ J99|476|	ATP-dependent_protease_subunit_HslV	E48
0	1	1	GI:409894694 ~ GI:443620691 ~ GI:4156039	26695|1518| ~ A45|721| ~ J99|1426|	futalosine_nucleosidase ~ nucleosidase	E48
2	0	0	GI:409894387 ~ GI:443620369 ~ GI:4155745	26695|1224| ~ A45|407| ~ J99|1159|	DNA_replication_regulator	E48
1	0	0	GI:443621351	A45|1377|	hypothetical_protein	E48
1	0	0	GI:409893439 ~ GI:443620126 ~ GI:4154779	26695|268| ~ A45|182| ~ J99|266|	hypothetical_protein	E48
6	0	0	GI:409894281 ~ GI:443620258 ~ GI:4155645	26695|1123| ~ A45|304| ~ J99|1063|	15_kDa_peptidoglycan-associated_lipoprotein	E48
1	0	0	GI:443620227	A45|275|	NADP-dependent_3-hydroxy_acid_dehydrogenase_YdfG	E48
1	0	0	GI:443621514	A45|1536|	Phosphate_acetyltransferase	E48
5	0	0	GI:409893733 ~ GI:443621433 ~ GI:4155064	26695|569| ~ A45|1460| ~ J99|532|	Adenine_phosphoribosyltransferase	E48
3	0	0	GI:409894184 ~ GI:443620842 ~ GI:4154922	26695|1028| ~ A45|873| ~ J99|405|	hypothetical_protein	E48
8	0	0	GI:409894464 ~ GI:443620576 ~ GI:4155834	26695|1298| ~ A45|604| ~ J99|1232|	hypothetical_protein	E48
9	1	1	GI:409894661 ~ GI:443620660 ~ GI:4156009	26695|1486| ~ A45|684| ~ J99|1397|	General_stress_protein_CTC	E48
1	0	0	GI:409893438 ~ GI:443620127 ~ GI:4154778	26695|267| ~ A45|183| ~ J99|265|	hypothetical_protein	E48
1	0	0	GI:409893952 ~ GI:443621211 ~ GI:4155305	26695|795| ~ A45|1232| ~ J99|748|	Molybdopterin_adenylyltransferase	E48
2	0	0	GI:409893399 ~ GI:443620096 ~ GI:4154745	26695|230| ~ A45|155| ~ J99|227|	hypothetical_protein	E48
1	0	0	NA	A45|28|	hypothetical_protein	E48
7	0	0	GI:409894619 ~ GI:443620618 ~ GI:4155961	26695|1446| ~ A45|644| ~ J99|1357|	LPP20_lipoprotein_precursor	E48
8	0	0	GI:409894362 ~ GI:443620339 ~ GI:4155723	26695|1198| ~ A45|379| ~ J99|1134|	hypothetical_protein	E48
3	1	1	GI:409893189 ~ GI:443621157 ~ GI:4154529	26695|24| ~ A45|1181| ~ J99|24|	hypothetical_protein	E48
1	0	0	GI:409894044 ~ GI:443621504 ~ GI:4155401	26695|886| ~ A45|1527| ~ J99|837|	acyl-CoA_esterase	E48
3	0	0	GI:409893946 ~ GI:443621217 ~ GI:4155293	26695|789| ~ A45|1238| ~ J99|742|	Peptide_deformylase ~ Peptide_deformylase_1	E48
1	0	0	GI:409894013 ~ GI:443620149 ~ GI:4155358	26695|857| ~ A45|205| ~ J99|807|	D,D-heptose_1,7-bisphosphate_phosphatase	E48
5	1	1	GI:409893783 ~ GI:443621382 ~ GI:4155114	26695|620| ~ A45|1411| ~ J99|578|	Inorganic_pyrophosphatase	E48
4	0	0	GI:409894291 ~ GI:443620268 ~ GI:4155641	26695|1134| ~ A45|314| ~ J99|1073|	F0F1_ATP_synthase_subunit_B	E48
4	0	0	GI:409894193 ~ GI:443620851 ~ GI:4154913	26695|1037| ~ A45|882| ~ J99|396|	3-dehydroquinate_dehydratase	E48
3	0	0	GI:409894711 ~ GI:443620758 ~ GI:4156080	26695|1533| ~ A45|787| ~ J99|1463|	hypothetical_protein	E48
3	0	0	GI:409893230 ~ GI:443621115 ~ GI:4154560	26695|68| ~ A45|1138| ~ J99|68|	Urease_accessory_protein_UreE	E48
1	0	0	NA	26695|1143|	hypothetical_protein	E48
2	0	0	GI:409894519 ~ GI:443620199 ~ GI:4155877	26695|1351| ~ A45|249| ~ J99|1283|	hypothetical_protein	E48
1	0	0	GI:409894183 ~ GI:443620841 ~ GI:4154921	26695|1027| ~ A45|872| ~ J99|406|	hypothetical_protein	E48
6	0	0	GI:409894705 ~ GI:443620752 ~ GI:4156094	26695|1527| ~ A45|781| ~ J99|1469|	Ubiquinol-cytochrome_c_reductase_iron-sulfur_subunit	E48
6	2	2	GI:409893816 ~ GI:443621349 ~ GI:4155130	26695|653| ~ A45|1375| ~ J99|611|	Ferritin	E48
1	0	0	GI:409893857 ~ GI:443621311 ~ GI:4155183	26695|697| ~ A45|1335| ~ J99|645|	Acetone_carboxylase_gamma_subunit	E48
10	0	0	GI:409893553 ~ GI:443620467 ~ GI:4155579	26695|382| ~ A45|500| ~ J99|1000|	putative_thiol_peroxidase	E48
1	0	0	NA	26695|687|	putative_3'-5'_exonuclease_related_to_the_exonuclease_domain_of_PolB	E48
7	0	0	GI:409893554 ~ GI:443620468 ~ GI:4155569	26695|383| ~ A45|501| ~ J99|999|	Chemotaxis_protein_CheW	E48
3	0	0	GI:409893573 ~ GI:443620486 ~ GI:4155552	26695|400| ~ A45|518| ~ J99|982|	hypothetical_protein	E48
1	0	0	NA	A45|939|	hypothetical_protein	E48
4	0	0	GI:409894019 ~ GI:443620155 ~ GI:4155364	26695|863| ~ A45|211| ~ J99|813|	Transcript_cleavage_factor_GreA	E48
7	1	1	GI:409894359 ~ GI:443620336 ~ GI:4155720	26695|1195| ~ A45|376| ~ J99|1131|	50S_ribosomal_protein_L10	E48
8	0	0	GI:409894316 ~ GI:443620311 ~ GI:4155685	26695|1158| ~ A45|354| ~ J99|1096|	Flavodoxin	E48
2	1	0	GI:409894191 ~ GI:443620849 ~ GI:4154911	26695|1035| ~ A45|880| ~ J99|398|	2-amino-4-hydroxy-6-_hydroxymethyldihydropteridine_pyrophosphokinase	E48
1	0	0	GI:409893320 ~ GI:443621030 ~ GI:4154658	26695|153| ~ A45|1055| ~ J99|151|	Shikimate_kinase	E48
6	0	0	GI:409894604 ~ GI:443620711 ~ GI:4155944	26695|1433| ~ A45|738| ~ J99|1344|	Peptidyl-prolyl_cis-trans_isomerase_B	E48
1	0	0	GI:409893896 ~ GI:443621265 ~ GI:4155223	26695|739| ~ A45|1291| ~ J99|693|	AP-4-A_phosphorylase	E48
3	0	0	GI:409893534 ~ GI:443620447 ~ GI:4155592	26695|363| ~ A45|481| ~ J99|1019|	Biotin_carboxyl_carrier_protein_of_acetyl-CoA_carboxylase	E48
1	0	0	GI:409894215 ~ GI:443620873 ~ GI:4154889	26695|1059| ~ A45|904| ~ J99|375|	Sec-independent_protein_translocase_protein_TatB	E48
5	0	0	GI:409894537 ~ GI:443620213 ~ GI:4155894	26695|1369| ~ A45|263| ~ J99|1297|	3-hydroxyacyl-[acyl-carrier-protein]_dehydratase_FabZ	E48
4	0	0	GI:409894421 ~ GI:443620529 ~ GI:4155792	26695|1255| ~ A45|557| ~ J99|1190|	NADH-quinone_oxidoreductase_subunit_6	E48
1	0	0	GI:409894385 ~ GI:443620367 ~ GI:4155743	26695|1222| ~ A45|405| ~ J99|1157|	RNA_pyrophosphohydrolase	E48
5	1	1	GI:409893165 ~ GI:443620802 ~ GI:4154505	26695|2| ~ A45|834| ~ J99|2|	6,7-dimethyl-8-ribityllumazine_synthase	E48
3	0	0	GI:443621406	A45|1435|	tumor_necrosis_factor_alpha-inducing_protein	E48
8	0	0	GI:409894354 ~ GI:443620331 ~ GI:4155708	26695|1191| ~ A45|372| ~ J99|1127|	hypothetical_protein	E48
1	0	0	GI:409893267 ~ GI:443621078 ~ GI:4154616	26695|102| ~ A45|1103| ~ J99|103|	S-ribosylhomocysteine_lyase	E48
1	0	0	GI:409894118	26695|958|	Acyl_carrier_protein	E48
2	0	0	GI:409893890 ~ GI:443621271 ~ GI:4155234	26695|733| ~ A45|1297| ~ J99|687|	xanthine-guanine_phosphoribosyltransferase	E48
4	1	1	GI:409893877 ~ GI:443621286 ~ GI:4155213	26695|719| ~ A45|1312| ~ J99|673|	hypothetical_protein	E48
2	0	0	GI:409894021 ~ GI:443620157 ~ GI:4155352	26695|865| ~ A45|213| ~ J99|815|	hypothetical_protein	E48
2	0	0	GI:409893735 ~ GI:443621431 ~ GI:4155066	26695|571| ~ A45|1458| ~ J99|534|	Putative_sugar_phosphate_isomerase_YwlF	E48
3	1	1	GI:409893297 ~ GI:443621051 ~ GI:4154631	26695|130| ~ A45|1077| ~ J99|129|	Putative_peroxiredoxin_bcp	E48
0	1	1	GI:409893800 ~ GI:443621365 ~ GI:4155141	26695|637| ~ A45|1393| ~ J99|594|	hypothetical_protein	E48
2	0	0	GI:409894608 ~ GI:443620707 ~ GI:4155948	26695|1437| ~ A45|734| ~ J99|1348|	Biopolymer_transport_protein_ExbB	E48
8	0	0	GI:409894182 ~ GI:443620840 ~ GI:4154920	26695|1026| ~ A45|871| ~ J99|407|	Ferric_uptake_regulation_protein	E48
8	1	1	GI:409893674 ~ GI:443621461 ~ GI:4155003	26695|512| ~ A45|1487| ~ J99|475|	50S_ribosomal_protein_L9	E48
2	0	0	GI:409894576 ~ GI:443620044 ~ GI:4155926	26695|1404| ~ A45|105| ~ J99|1317|	NADPH-dependent_7-cyano-7-deazaguanine_reductase	E48
3	0	0	GI:409894498 ~ GI:443620610 ~ GI:4155871	26695|1331| ~ A45|638| ~ J99|1263|	Putative_nickel-responsive_regulator	E48
7	0	0	GI:409894462 ~ GI:443620574 ~ GI:4155832	26695|1296| ~ A45|602| ~ J99|1230|	hypothetical_protein	E48
2	1	1	GI:409894538 ~ GI:443620214 ~ GI:4155903	26695|1370| ~ A45|264| ~ J99|1298|	Flagellar_assembly_factor_FliW_2	E48
5	0	0	GI:409893290 ~ GI:443621057 ~ GI:4154637	26695|124| ~ A45|1083| ~ J99|123|	hypothetical_protein	E48
1	0	0	GI:409894018 ~ GI:443620154 ~ GI:4155363	26695|862| ~ A45|210| ~ J99|812|	Deoxyuridine_5'-triphosphate_nucleotidohydrolase	E48
1	1	1	GI:409894499 ~ GI:443620611 ~ GI:4155859	26695|1332| ~ A45|639| ~ J99|1264|	Biopolymer_transport_protein_ExbB	E48
12	0	0	GI:409893409 ~ GI:443620086 ~ GI:4154739	26695|239| ~ A45|145| ~ J99|236|	DNA_protection_during_starvation_protein	E48
4	0	0	GI:409894292 ~ GI:443620269 ~ GI:4155642	26695|1135| ~ A45|315| ~ J99|1074|	F-type_ATPase_subunit_b ~ F0F1_ATP_synthase_subunit_B'	E48
7	0	0	GI:409894405 ~ GI:443620513 ~ GI:4155764	26695|1239| ~ A45|542| ~ J99|1175|	30S_ribosomal_protein_S6 ~ hypothetical_protein	E48
5	0	0	GI:409894472 ~ GI:443620584 ~ GI:4155824	26695|1305| ~ A45|611| ~ J99|1239|	50S_ribosomal_protein_L16	E48
7	0	0	GI:409893245 ~ GI:443621101 ~ GI:4154587	26695|81| ~ A45|1124| ~ J99|80|	50S_ribosomal_protein_L13	E48
5	0	0	GI:409894361 ~ GI:443620338 ~ GI:4155722	26695|1197| ~ A45|378| ~ J99|1133|	50S_ribosomal_protein_L11	E48
4	0	0	GI:443621287 ~ GI:4155219	A45|1313| ~ J99|672|	hypothetical_protein	E48
2	0	0	GI:409893164 ~ GI:443620801 ~ GI:4154504	26695|1| ~ A45|833| ~ J99|1|	hypothetical_protein	E48
2	2	2	GI:409893192 ~ GI:4154532	26695|27| ~ J99|27|	Universal_stress_protein_family_protein	E48
4	1	0	GI:409893360 ~ GI:443621001 ~ GI:4154691	26695|193| ~ A45|1027| ~ J99|190|	Nucleoside_diphosphate_kinase	E48
5	0	0	GI:409894355 ~ GI:443620332 ~ GI:4155709	26695|1192| ~ A45|373| ~ J99|1128|	30S_ribosomal_protein_S12	E48
1	0	0	GI:409894309 ~ GI:443620318 ~ GI:4155665	26695|1151| ~ A45|361| ~ J99|1089|	Flagellar_assembly_factor_FliW_1	E48
6	0	0	GI:409894609 ~ GI:443620706 ~ GI:4155949	26695|1438| ~ A45|733| ~ J99|1349|	Biopolymer_transport_protein_ExbD	E48
3	0	0	GI:409893657 ~ GI:443621483 ~ GI:4154984	26695|493| ~ A45|1508| ~ J99|460|	Acyl-CoA_thioester_hydrolase_YbgC	E48
5	0	0	GI:409894461 ~ GI:443620573 ~ GI:4155831	26695|1295| ~ A45|601| ~ J99|1229|	50S_ribosomal_protein_L15	E48
1	0	0	GI:409894420 ~ GI:443620528 ~ GI:4155791	26695|1254| ~ A45|556| ~ J99|1189|	NAD(P)H-quinone_oxidoreductase_subunit_3	E48
1	0	0	GI:409894284 ~ GI:443620261 ~ GI:4155648	26695|1127| ~ A45|307| ~ J99|1066|	Biopolymer_transport_protein_ExbD	E48
1	0	0	GI:443621360	A45|1386|	Putative_NAD(P)H_nitroreductase	E48
2	0	0	GI:409894455 ~ GI:443620567 ~ GI:4155843	26695|1289| ~ A45|596| ~ J99|1223|	30S_ribosomal_protein_S11	E48
11	0	0	GI:409894465 ~ GI:443620577 ~ GI:4155835	26695|1299| ~ A45|605| ~ J99|1233|	30S_ribosomal_protein_S8	E48
3	0	0	GI:409894263 ~ GI:443620240 ~ GI:4155625	26695|1106| ~ A45|287| ~ J99|1044|	Pyruvic-ferredoxin_oxidoreductase_subunit_delta	E48
5	0	0	GI:409893244 ~ GI:443621102 ~ GI:4154586	26695|80| ~ A45|1125| ~ J99|79|	hypothetical_protein	E48
2	0	0	GI:409894500 ~ GI:443620612 ~ GI:4155860	26695|1333| ~ A45|640| ~ J99|1265|	Biopolymer_transport_protein_ExbD	E48
6	0	0	GI:409894716 ~ GI:443620763	26695|1538| ~ A45|792|	preprotein_translocase_subunit_YajC	E48
3	0	0	GI:409893908 ~ GI:443621253 ~ GI:4155244	26695|751| ~ A45|1278| ~ J99|705|	Flagellar_protein_FliS	E48
1	0	0	GI:409894486 ~ GI:443620598 ~ GI:4155846	26695|1319| ~ A45|626| ~ J99|1252|	hypothetical_protein	E48
2	2	1	GI:409894099 ~ GI:443620404 ~ GI:4155446	26695|940| ~ A45|440| ~ J99|891|	RutC_family_protein	E48
4	0	0	GI:409894358 ~ GI:443620335 ~ GI:4155719	26695|1194| ~ A45|375| ~ J99|1130|	hypothetical_protein	E48
7	0	0	GI:409894222 ~ GI:443620880 ~ GI:4154896	26695|1066| ~ A45|911| ~ J99|368|	hypothetical_protein	E48
1	0	0	NA	26695|900|	Phosphate_acetyltransferase	E48
5	0	0	GI:409894286 ~ GI:443620263 ~ GI:4155650	26695|1129| ~ A45|309| ~ J99|1068|	F-ATPase_epsilon_subunit	E48
1	0	0	GI:409893477 ~ GI:443620946 ~ GI:4154818	26695|306| ~ A45|975| ~ J99|305|	hypothetical_protein	E48
5	0	0	GI:409894469 ~ GI:443620581 ~ GI:4155821	26695|1302| ~ A45|608| ~ J99|1236|	50S_ribosomal_protein_L14	E48
4	0	0	GI:409894474 ~ GI:443620586 ~ GI:4155826	26695|1307| ~ A45|613| ~ J99|1241|	50S_ribosomal_protein_L22	E48
1	0	0	GI:409893785 ~ GI:443621380 ~ GI:4155105	26695|622| ~ A45|1409| ~ J99|580|	hypothetical_protein	E48
6	0	0	GI:443620164	A45|220|	Catalase	E48
11	0	0	GI:409894456 ~ GI:443620568 ~ GI:4155844	26695|1290| ~ A45|597| ~ J99|1224|	30S_ribosomal_protein_S13 ~ hypothetical_protein	E48
3	0	0	GI:409893906 ~ GI:443621255 ~ GI:4155242	26695|749| ~ A45|1280| ~ J99|703|	flagellar_protein_FlaG	E48
5	0	0	GI:409893173 ~ GI:443619998 ~ GI:4154503	26695|9| ~ A45|63| ~ J99|9|	co-chaperonin_GroES	E48
5	0	0	GI:409894463 ~ GI:443620575 ~ GI:4155833	26695|1297| ~ A45|603| ~ J99|1231|	hypothetical_protein	E48
2	0	0	GI:409894056	26695|897|	Acetate_kinase	E48
6	0	0	GI:409894302 ~ GI:443620325 ~ GI:4155668	26695|1144| ~ A45|368| ~ J99|1082|	50S_ribosomal_protein_L19	E48
1	0	0	GI:409894085	26695|927|	hypothetical_protein	E48
1	0	0	GI:409894675 ~ GI:443620675 ~ GI:4156024	26695|1499| ~ A45|701| ~ J99|1410|	FolB_domain_protein	E48
2	0	0	NA	26695|833|	hypothetical_protein	E48
4	0	0	GI:409894452 ~ GI:443620564 ~ GI:4155840	26695|1286| ~ A45|593| ~ J99|1220|	50S_ribosomal_protein_L17	E48
1	1	0	GI:409893288 ~ GI:443621059 ~ GI:4154635	26695|122| ~ A45|1085| ~ J99|121|	50S_ribosomal_protein_L20	E48
1	0	0	GI:409894688 ~ GI:443620685 ~ GI:4156034	26695|1513| ~ A45|715| ~ J99|1421|	hypothetical_protein	E48
1	1	0	GI:409893708 ~ GI:4155028	26695|542| ~ J99|505|	hypothetical_protein	E48
3	0	0	GI:409893680 ~ GI:4155012	26695|518| ~ J99|481|	hypothetical_protein	E48
1	0	0	GI:409894618 ~ GI:443620617 ~ GI:4155960	26695|1445| ~ A45|643| ~ J99|1356|	hypothetical_protein	E48
1	0	0	GI:409894380 ~ GI:443620362 ~ GI:4155751	26695|1217| ~ A45|400| ~ J99|1152|	molybdopterin_biosynthesis_protein_MoeB	E48
1	0	0	GI:409893750 ~ GI:443621415 ~ GI:4155083	26695|586| ~ A45|1443| ~ J99|549|	Periplasmic_[Fe]_hydrogenase_large_subunit	E48
1	0	0	GI:409894577 ~ GI:443620045 ~ GI:4155927	26695|1405| ~ A45|106| ~ J99|1318|	Ribosomal_silencing_factor_RsfS	E48
1	0	0	GI:409894202 ~ GI:443620860 ~ GI:4154898	26695|1046| ~ A45|891| ~ J99|388|	Ribosome-binding_factor_A	E48
6	0	0	GI:409893776 ~ GI:443621389 ~ GI:4155108	26695|613| ~ A45|1418| ~ J99|570|	hypothetical_protein	E48
2	0	0	GI:409893734 ~ GI:443621432 ~ GI:4155065	26695|570| ~ A45|1459| ~ J99|533|	hypothetical_protein	E48
1	0	0	GI:409894723 ~ GI:443620769 ~ GI:4156086	26695|1544| ~ A45|798| ~ J99|1475|	flagellar_hook-basal_body_protein_FliE	E48
0	1	1	GI:443620395	A45|431|	hypothetical_protein	E48
9	0	0	GI:409893977 ~ GI:443621185 ~ GI:4155328	26695|821| ~ A45|1207| ~ J99|776|	Thioredoxin	E48
3	0	0	GI:409893462 ~ GI:443620961 ~ GI:4154806	26695|291| ~ A45|990| ~ J99|289|	50S_ribosomal_protein_L21	E48
4	1	1	GI:409894621 ~ GI:443620620 ~ GI:4155972	26695|1448| ~ A45|646| ~ J99|1359|	Thioredoxin	E48
1	0	0	NA	26695|688|	putative_3'-5'_exonuclease_related_to_the_exonuclease_domain_of_PolB	E48
6	0	0	GI:409894480 ~ GI:443620592 ~ GI:4155817	26695|1313| ~ A45|619| ~ J99|1247|	hypothetical_protein	E48
2	0	0	NA	26695|1529| ~ A45|783| ~ J99|1467|	Polymer-forming_cytoskeletal	E48
1	0	0	GI:409893568 ~ GI:443620482 ~ GI:4155566	26695|396| ~ A45|514| ~ J99|986|	HIT-like_protein	E48
5	0	0	NA	26695|834|	hypothetical_protein	E48
1	0	0	GI:409894430 ~ GI:443620538 ~ GI:4155781	26695|1264| ~ A45|566| ~ J99|1199|	NADH-quinone_oxidoreductase_subunit_K	E48
1	0	0	NA ~ GI:443621006 ~ GI:4154708	26695|198| ~ A45|1032| ~ J99|195|	hypothetical_protein	E48
2	1	0	GI:409894055 ~ GI:443621512 ~ GI:4155409	26695|896| ~ A45|1534| ~ J99|850|	hypothetical_protein ~ Cupin_domain_protein	E48
1	0	0	GI:409894100	26695|941|	hypothetical_protein	E48
1	0	0	NA	A45|1392|	Helicobacter_outer_membrane_protein	E48
3	0	0	GI:4156070	J99|1458|	preprotein_translocase_subunit_YajC	E48
3	0	0	GI:409894384 ~ GI:443620366 ~ GI:4155742	26695|1221| ~ A45|404| ~ J99|1156|	Cytochrome_c553	E48
1	0	0	GI:409894121	26695|963|	Endoribonuclease_VapD	E48
2	0	0	GI:409893989 ~ GI:443621174 ~ GI:4155341	26695|832| ~ A45|1196| ~ J99|787|	HCj	E48
1	0	0	GI:409894156 ~ GI:443620016	26695|997| ~ A45|78|	hypothetical_protein	E48
3	0	0	GI:409894475 ~ GI:443620587 ~ GI:4155812	26695|1308| ~ A45|614| ~ J99|1242|	30S_ribosomal_protein_S19	E48
1	0	0	GI:443620698	A45|727|	hypothetical_protein	E48
3	0	0	GI:409894477 ~ GI:443620589 ~ GI:4155814	26695|1310| ~ A45|616| ~ J99|1244|	50S_ribosomal_protein_L23	E48
1	0	0	GI:443619961	A45|26|	hypothetical_protein	E48
2	0	0	GI:443621372	A45|1402|	hypothetical_protein	E48
2	0	0	GI:409894195 ~ GI:443620853 ~ GI:4154915	26695|1039| ~ A45|884| ~ J99|394|	30S_ribosomal_protein_S15	E48
1	0	0	GI:409893237 ~ GI:443621108 ~ GI:4154580	26695|74| ~ A45|1132| ~ J99|74|	hypothetical_protein	E48
1	0	0	GI:443621154	A45|1178|	Universal_stress_protein_family_protein	E48
4	0	0	GI:409893463 ~ GI:443620960 ~ GI:4154807	26695|292| ~ A45|989| ~ J99|290|	50S_ribosomal_protein_L27	E48
2	0	0	GI:443619960	A45|25|	mRNA_interferase_YafQ	E48
3	0	0	GI:409894470 ~ GI:443620582 ~ GI:4155822	26695|1303| ~ A45|609| ~ J99|1237|	30S_ribosomal_protein_S17	E48
1	0	0	GI:409893387 ~ GI:443620970 ~ GI:4154729	26695|219| ~ A45|996| ~ J99|216|	hypothetical_protein	E48
2	0	0	GI:409894403 ~ GI:443620511 ~ GI:4155773	26695|1237| ~ A45|540| ~ J99|1173|	hypothetical_protein	E48
1	0	0	NA	26695|1126|	hypothetical_protein	E48
1	0	0	GI:409894585 ~ GI:443620054 ~ GI:4155923	26695|1415| ~ A45|118| ~ J99|1328|	S4_domain_protein	E48
4	0	0	GI:409893725 ~ GI:443621441 ~ GI:4155050	26695|561| ~ A45|1468| ~ J99|522|	hypothetical_protein	E48
1	0	0	GI:409893434 ~ GI:443620131 ~ GI:4154787	26695|263| ~ A45|187| ~ J99|261|	hypothetical_protein	E48
2	0	0	GI:409893721 ~ GI:443621445 ~ GI:4155045	26695|557| ~ A45|1472| ~ J99|518|	Acyl_carrier_protein	E48
1	0	0	GI:409893499 ~ GI:443620926 ~ GI:4154853	26695|326| ~ A45|956| ~ J99|325|	Cell_division_topological_specificity_factor	E48
1	0	0	GI:409894144	26695|983|	hypothetical_protein	E48
1	0	0	GI:409894306 ~ GI:443620321 ~ GI:4155672	26695|1148| ~ A45|364| ~ J99|1086|	hypothetical_protein	E48
1	0	0	GI:409894605 ~ GI:443620710 ~ GI:4155945	26695|1434| ~ A45|737| ~ J99|1345|	hypothetical_protein	E48
1	0	0	GI:409893548 ~ GI:443620462 ~ GI:4155586	26695|377| ~ A45|495| ~ J99|1005|	hypothetical_protein	E48
1	0	0	NA	J99|293|	Dipeptide_transport_system_permease_protein_DppC	E48
1	0	0	GI:409893930 ~ GI:443621232 ~ GI:4155269	26695|773| ~ A45|1253| ~ J99|727|	DNA-directed_RNA_polymerase_subunit_omega	E48
1	0	0	GI:409894468 ~ GI:443620580 ~ GI:4155820	26695|1301| ~ A45|607| ~ J99|1235|	50S_ribosomal_protein_L24	E48
2	0	0	GI:409894058	26695|899|	Phosphate_acetyltransferase	E48
2	0	0	GI:409894458 ~ GI:443620570 ~ GI:4155828	26695|1292| ~ A45|598| ~ J99|1226|	Translation_initiation_factor_IF-1	E48
1	0	0	GI:409893308 ~ GI:443621041 ~ GI:4154644	26695|141| ~ A45|1067| ~ J99|139|	cytochrome_c_oxidase,_cbb3-type,_CcoQ_subunit	E48
2	0	0	GI:409894086	26695|928|	hypothetical_protein	E48
3	0	0	GI:409893723 ~ GI:443621443 ~ GI:4155048	26695|559| ~ A45|1470| ~ J99|520|	30S_ribosomal_protein_S21	E48
1	0	0	GI:409893310 ~ GI:443621039 ~ GI:4154646	26695|143| ~ A45|1065| ~ J99|141|	hypothetical_protein	E48
2	0	0	GI:409893713 ~ GI:443621453 ~ GI:4155038	26695|549| ~ A45|1479| ~ J99|510|	50S_ribosomal_protein_L31	E48
3	0	0	GI:409894471 ~ GI:443620583 ~ GI:4155823	26695|1304| ~ A45|610| ~ J99|1238|	50S_ribosomal_protein_L29	E48
1	0	0	GI:409894228 ~ GI:443620886 ~ GI:4154886	26695|1071| ~ A45|916| ~ J99|363|	Copper_ion-binding_protein	E48
1	0	0	GI:409893287 ~ GI:443621060 ~ GI:4154623	26695|121| ~ A45|1086| ~ J99|120|	50S_ribosomal_protein_L35	E48
1	0	0	GI:409893652 ~ GI:443621488 ~ GI:4154978	26695|488| ~ A45|1513| ~ J99|455|	50S_ribosomal_protein_L28	E48
1	0	0	GI:409894031	26695|875|	hypothetical_protein	E48
2	0	0	GI:409893876	26695|718|	hypothetical_protein	E48
1	0	0	GI:409894364 ~ GI:443620341 ~ GI:4155730	26695|1200| ~ A45|381| ~ J99|1136|	50S_ribosomal_protein_L33_2	E48
1	0	0	GI:443621153	A45|1177|	hypothetical_protein	E48
2	0	0	GI:409893296 ~ GI:443621052 ~ GI:4154630	26695|129| ~ A45|1078| ~ J99|128|	hypothetical_protein	E48
1	0	0	NA	26695|694|	hypothetical_protein	E48
5	0	0	GI:4155101	J99|569|	Vacuolating_cytotoxin_autotransporter_precursor	H13-1
106	3	2	GI:409894356 ~ GI:443620333 ~ GI:4155718	26695|1193| ~ A45|374| ~ J99|1129|	Bifunctional_DNA-directed_RNA_polymerase_subunit_beta-beta'	H13-1
1	0	0	GI:443621393	A45|1422|	PPE-repeat_proteins	H13-1
4	0	0	NA	26695|609|	Vacuolating_cytotoxin_autotransporter_precursor	H13-1
7	0	0	GI:409893689 ~ GI:4155007	26695|524| ~ J99|488|	Type_IV_secretion_system_protein_virB10	H13-1
16	0	0	NA ~ GI:443621500 ~ GI:4155390	26695|882| ~ A45|1523| ~ J99|832|	Vacuolating_cytotoxin_autotransporter_precursor	H13-1
8	0	0	GI:409894682 ~ GI:443620681 ~ GI:4156028	26695|1505| ~ A45|708| ~ J99|1416|	Type_IIS_restriction_enzyme_Eco57I	H13-1
2	0	0	NA	26695|608|	PPE-repeat_proteins	H13-1
7	0	0	GI:409894312 ~ GI:443620315 ~ GI:4155681	26695|1154| ~ A45|358| ~ J99|1092|	Helicobacter_outer_membrane_protein	H13-1
10	0	0	GI:409894623 ~ GI:443620622 ~ GI:4155965	26695|1450| ~ A45|648| ~ J99|1361|	DNA_polymerase_III_subunit_alpha	H13-1
16	8	4	GI:409893710 ~ GI:4155035	26695|544| ~ J99|506|	CAG_pathogenicity_island_protein_26	H13-1
32	3	3	GI:409893216 ~ GI:443621131 ~ GI:4154555	26695|53| ~ A45|1155| ~ J99|49|	1-pyrroline-5-carboxylate_dehydrogenase_1 ~ 1-pyrroline-5-carboxylate_dehydrogenase	H13-1
2	0	0	NA	A45|1034|	putative_ATP-binding_protein_involved_in_virulence	H13-1
22	1	1	GI:409894073 ~ GI:443621529 ~ GI:4155424	26695|915| ~ A45|1550| ~ J99|864|	Carbamoyl-phosphate_synthase_large_chain	H13-1
17	1	1	GI:409893771 ~ GI:443621395 ~ GI:4155092	26695|606| ~ A45|1424| ~ J99|567|	Multidrug_transporter_MdtC	H13-1
3	1	1	GI:409894123 ~ GI:443620425 ~ GI:4155474	26695|964| ~ A45|464| ~ J99|915|	Cation_efflux_system_protein_CzcA	H13-1
2	0	0	GI:409894706 ~ GI:443620753 ~ GI:4156075	26695|1528| ~ A45|782| ~ J99|1468|	Transcription-repair-coupling_factor	H13-1
1	0	0	GI:409893754 ~ GI:443621411	26695|590| ~ A45|1439|	type_III_restriction-modification_system_StyLTI_enzyme_res	H13-1
9	0	0	GI:409893706 ~ GI:4155026	26695|540| ~ J99|503|	Type_IV_secretion_system_protein_virB4	H13-1
4	4	3	GI:409893748 ~ GI:443621417 ~ GI:4155081	26695|584| ~ A45|1445| ~ J99|547|	putative_protein_involved_in_outer_membrane_biogenesis ~ hypothetical_protein	H13-1
3	0	0	GI:443621392	A45|1421|	Vacuolating_cytotoxin_autotransporter_precursor	H13-1
13	1	1	GI:409894203 ~ GI:443620861 ~ GI:4154899	26695|1047| ~ A45|892| ~ J99|387|	Translation_initiation_factor_IF-2	H13-1
7	0	0	GI:409894718 ~ GI:443620765 ~ GI:4156072	26695|1540| ~ A45|794| ~ J99|1456|	ATP-dependent_helicase/nuclease_subunit_A	H13-1
9	1	1	GI:409893863 ~ GI:443621303 ~ GI:4155197	26695|703| ~ A45|1327| ~ J99|658|	Excinuclease_ABC_subunit_A	H13-1
6	0	0	GI:409893541 ~ GI:443620454 ~ GI:4155589	26695|370| ~ A45|488| ~ J99|1012|	Cytochrome_c_biogenesis_protein_CcsA	H13-1
23	2	1	GI:409894584 ~ GI:443620053 ~ GI:4155922	26695|1414| ~ A45|117| ~ J99|1327|	Isoleucine--tRNA_ligase	H13-1
13	0	0	GI:409894633 ~ GI:443620633 ~ GI:4155975	26695|1460| ~ A45|658| ~ J99|1371|	DNA_polymerase_I,_thermostable ~ DNA_polymerase_I	H13-1
8	1	0	GI:409893818 ~ GI:443621347 ~ GI:4155152	26695|655| ~ A45|1373| ~ J99|613|	Outer_membrane_protein_Omp85	H13-1
30	4	4	GI:409894677 ~ GI:443620677 ~ GI:4156026	26695|1501| ~ A45|703| ~ J99|1412|	Brucella_heme_uptake_protein_A	H13-1
9	1	1	GI:409894308 ~ GI:443620319 ~ GI:4155674	26695|1150| ~ A45|362| ~ J99|1088|	Valine--tRNA_ligase	H13-1
25	2	2	GI:409893939 ~ GI:443621223 ~ GI:4155279	26695|782| ~ A45|1244| ~ J99|736|	preprotein_translocase_subunit_SecA	H13-1
4	0	0	GI:409894245 ~ GI:443620904 ~ GI:4154862	26695|1088| ~ A45|933| ~ J99|346|	Stage_III_sporulation_protein_E	H13-1
33	3	2	GI:409893430 ~ GI:443620135 ~ GI:4154766	26695|259| ~ A45|191| ~ J99|257|	Chaperone_protein_ClpB	H13-1
39	1	1	GI:409893933 ~ GI:443621229 ~ GI:4155281	26695|776| ~ A45|1250| ~ J99|730|	Aconitate_hydratase_2	H13-1
18	0	0	GI:409894426 ~ GI:443620534 ~ GI:4155777	26695|1260| ~ A45|562| ~ J99|1195|	NADP-reducing_hydrogenase_subunit_HndC	H13-1
10	4	2	GI:409894397 ~ GI:443620380 ~ GI:4155760	26695|1234| ~ A45|417| ~ J99|1170|	Alanine--tRNA_ligase	H13-1
2	0	0	GI:409894643 ~ GI:443620643 ~ GI:4155999	26695|1469| ~ A45|667| ~ J99|1380|	putative_PEP-CTERM_system_TPR-repeat_lipoprotein	H13-1
0	1	1	GI:409894564 ~ GI:443620734 ~ GI:4156048	26695|1393| ~ A45|763| ~ J99|1435|	Iron(III)_dicitrate_transport_protein_FecA	H13-1
21	2	1	GI:409894541 ~ GI:443620217 ~ GI:4155905	26695|1372| ~ A45|267| ~ J99|1301|	Lon_protease	H13-1
12	0	0	GI:409893860 ~ GI:443621307 ~ GI:4155194	26695|700| ~ A45|1331| ~ J99|655|	DNA_gyrase_subunit_A	H13-1
9	2	1	GI:409893461 ~ GI:443620962 ~ GI:4154805	26695|290| ~ A45|991| ~ J99|288|	Hook-filament_junction_protein	H13-1
23	1	1	GI:409893555 ~ GI:443620469 ~ GI:4155570	26695|384| ~ A45|502| ~ J99|998|	Chemotaxis_protein_CheA	H13-1
9	0	0	GI:4155422	J99|862|	Brucella_heme_uptake_protein_A	H13-1
1	0	0	NA	A45|232|	Modification_methylase_VspI	H13-1
24	0	0	GI:409893283 ~ GI:443621064 ~ GI:4154619	26695|118| ~ A45|1089| ~ J99|117|	Phosphoenolpyruvate_synthase	H13-1
18	0	0	GI:409894712 ~ GI:443620759 ~ GI:4156066	26695|1534| ~ A45|788| ~ J99|1462|	Leucine--tRNA_ligase	H13-1
2	0	0	GI:409894434 ~ GI:443620542 ~ GI:4155785	26695|1268| ~ A45|570| ~ J99|1203|	tol-pal_system_protein_YbgF	H13-1
19	0	0	GI:409893960 ~ GI:443621203 ~ GI:4155299	26695|803| ~ A45|1224| ~ J99|756|	Iron(III)_dicitrate_transport_protein_FecA	H13-1
31	1	1	GI:409893840 ~ GI:443621326 ~ GI:4155174	26695|679| ~ A45|1350| ~ J99|635|	Ribonucleoside-diphosphate_reductase_1_subunit_alpha	H13-1
2	1	1	GI:409894244 ~ GI:443620903 ~ GI:4154868	26695|1087| ~ A45|932| ~ J99|347|	putative_DNA_repair_protein	H13-1
9	3	2	GI:409893929 ~ GI:443621233 ~ GI:4155268	26695|772| ~ A45|1254| ~ J99|726|	Bifunctional_(p)ppGpp_synthase/hydrolase_RelA	H13-1
19	3	3	GI:409893662 ~ GI:4154989	26695|498| ~ J99|465|	DNA_gyrase_subunit_B	H13-1
0	1	1	GI:409893847 ~ GI:443621321 ~ GI:4155171	26695|685| ~ A45|1345| ~ J99|640|	Iron(III)_dicitrate_transport_protein_FecA	H13-1
14	2	1	GI:409893565 ~ GI:443620479 ~ GI:4155564	26695|394| ~ A45|512| ~ J99|988|	Phenylalanine--tRNA_ligase_beta_subunit	H13-1
6	1	1	GI:409894616 ~ GI:409893536 ~ GI:443620449 ~ GI:443620699 ~ GI:4155594 ~ GI:4155958	26695|1443| ~ 26695|365| ~ A45|483| ~ A45|728| ~ J99|1017| ~ J99|1354|	Helicobacter_outer_membrane_protein	H13-1
7	0	0	GI:409893685 ~ GI:4155016	26695|521| ~ J99|485|	Conjugal_transfer_protein_TraG	H13-1
1	0	0	GI:409894227 ~ GI:443620885 ~ GI:4154885	26695|1070| ~ A45|915| ~ J99|364|	Copper-exporting_P-type_ATPase_A	H13-1
21	1	1	GI:409894401 ~ GI:409893484 ~ GI:409894049 ~ GI:443621507 ~ GI:443620382 ~ GI:4155775 ~ GI:4155400	26695|1236| ~ 26695|311| ~ 26695|891| ~ A45|1529| ~ A45|419| ~ J99|1172| ~ J99|844|	Helicobacter_outer_membrane_protein	H13-1
6	0	0	GI:409893194 ~ GI:443621151 ~ GI:4154534	26695|29| ~ A45|1175| ~ J99|29|	ATP-dependent_Clp_protease_ATP-binding_subunit_ClpA	H13-1
8	0	0	GI:409893278 ~ GI:443621067 ~ GI:4154624	26695|113| ~ A45|1092| ~ J99|114|	DNA_topoisomerase_1	H13-1
1	0	0	GI:409894196 ~ GI:443620854 ~ GI:4154916	26695|1040| ~ A45|885| ~ J99|393|	Flagellar_biosynthesis_protein_FlhA	H13-1
16	0	0	GI:409894023 ~ GI:443620159 ~ GI:4155354	26695|867| ~ A45|215| ~ J99|817|	Flagellar_hook_protein_FlgE	H13-1
26	1	0	GI:409893354 ~ GI:443620995 ~ GI:4154697	26695|187| ~ A45|1021| ~ J99|184|	Fumarate_reductase_flavoprotein_subunit	H13-1
3	1	1	GI:409893186 ~ GI:4154526	26695|21| ~ J99|21|	Helicobacter_outer_membrane_protein	H13-1
5	0	0	GI:409894126 ~ GI:443620428 ~ GI:4155477	26695|967| ~ A45|467| ~ J99|918|	Glycine--tRNA_ligase_beta_subunit	H13-1
5	1	1	GI:409893868 ~ GI:443621298 ~ GI:4155201 ~ GI:4155432	26695|708| ~ A45|1322| ~ J99|663| ~ J99|882|	Helicobacter_outer_membrane_protein	H13-1
13	0	0	GI:409894311 ~ GI:443620316 ~ GI:4155680	26695|1153| ~ A45|359| ~ J99|1091|	Helicobacter_outer_membrane_protein	H13-1
7	4	4	NA	26695|1335| ~ 26695|223| ~ J99|1267| ~ J99|220|	Helicobacter_outer_membrane_protein	H13-1
38	1	1	GI:409894353 ~ GI:443620330 ~ GI:4155707	26695|1190| ~ A45|371| ~ J99|1126|	Elongation_factor_G	H13-1
18	3	1	GI:409894590 ~ GI:443620059 ~ GI:4155934	26695|1422| ~ A45|125| ~ J99|1333|	Ribonuclease_J_1	H13-1
1	0	0	GI:409894324 ~ GI:443620304 ~ GI:4155693	26695|1165| ~ A45|347| ~ J99|1103|	Carbon_starvation_protein_A	H13-1
13	3	1	GI:409894372 ~ GI:443620350 ~ GI:4155738	26695|1208| ~ A45|390| ~ J99|1144|	Polyribonucleotide_nucleotidyltransferase	H13-1
1	0	0	GI:443620715 ~ GI:4155510	A45|741| ~ J99|944|	DNA_topoisomerase_1	H13-1
14	1	1	GI:409893944 ~ GI:443621219 ~ GI:4155291	26695|787| ~ A45|1240| ~ J99|740|	Cadmium,_zinc_and_cobalt-transporting_ATPase	H13-1
7	0	0	GI:409893907 ~ GI:443621254 ~ GI:4155243	26695|750| ~ A45|1279| ~ J99|704|	Flagellar_cap_protein	H13-1
4	0	0	GI:409894642 ~ GI:443620642 ~ GI:4155998	26695|1468| ~ A45|666| ~ J99|1379|	ATP-dependent_DNA_helicase_PcrA	H13-1
10	0	0	GI:409893249 ~ GI:443621096 ~ GI:4154591	26695|85| ~ A45|1120| ~ J99|84|	Sigma-A ~ RNA_polymerase_sigma_factor_RpoD	H13-1
1	0	0	GI:409894635 ~ GI:4155977	26695|1462| ~ J99|1373|	Restriction_enzyme_BgcI_subunit_alpha	H13-1
2	0	0	GI:443620635	A45|660|	Restriction_enzyme_BgcI_subunit_alpha	H13-1
10	0	0	GI:409894165 ~ GI:443620824 ~ GI:4154945	26695|1009| ~ A45|855| ~ J99|423|	Polyphosphate_kinase	H13-1
24	2	2	GI:409893260 ~ GI:443621085 ~ GI:4154599	26695|96| ~ A45|1109| ~ J99|97|	Methyl-accepting_chemotaxis_protein_4	H13-1
17	1	1	GI:409893243 ~ GI:443621103 ~ GI:4154575	26695|79| ~ A45|1126| ~ J99|78|	Chemotaxis_regulator_BdlA	H13-1
24	0	0	GI:409894200 ~ GI:443620858	26695|1044| ~ A45|889|	Acetyl-coenzyme_A_synthetase	H13-1
8	1	0	GI:409893760 ~ GI:443621405 ~ GI:4155095	26695|595| ~ A45|1434| ~ J99|557|	Penicillin-binding_protein_1A ~ Penicillin-binding_protein_F	H13-1
3	0	0	GI:409894268 ~ GI:443620245 ~ GI:4155631	26695|1111| ~ A45|292| ~ J99|1049|	Excinuclease_ABC_subunit_B	H13-1
13	1	1	GI:409893777 ~ GI:443621388 ~ GI:4155109	26695|614| ~ A45|1417| ~ J99|571|	DNA_ligase	H13-1
16	2	2	GI:409893582 ~ GI:443620492 ~ GI:4155547	26695|409| ~ A45|523| ~ J99|976|	Methionine--tRNA_ligase	H13-1
2	0	0	NA	A45|713|	putative_methyltransferase	H13-1
5	0	0	GI:409893878 ~ GI:409893881 ~ GI:443621282 ~ GI:4155214 ~ GI:4155217	26695|720| ~ 26695|723| ~ A45|1308| ~ J99|674| ~ J99|677|	Helicobacter_outer_membrane_protein	H13-1
12	4	3	GI:409894333 ~ GI:443620295 ~ GI:4155700	26695|1173| ~ A45|339| ~ J99|1111|	Helicobacter_outer_membrane_protein	H13-1
5	0	0	GI:409893848 ~ GI:443621320 ~ GI:4155172	26695|686| ~ A45|1344| ~ J99|641|	Ferrous_iron_transport_protein_B	H13-1
9	0	0	GI:409894243 ~ GI:443620902 ~ GI:4154867	26695|1086| ~ A45|931| ~ J99|348|	Transketolase	H13-1
3	0	0	GI:409893171 ~ GI:443620807 ~ GI:4154510	26695|7| ~ A45|839| ~ J99|7|	Helicobacter_outer_membrane_protein	H13-1
19	1	1	GI:409894224 ~ GI:443620882 ~ GI:4154882	26695|1068| ~ A45|913| ~ J99|366|	ATP-dependent_zinc_metalloprotease_FtsH	H13-1
4	0	0	GI:409893276 ~ GI:443621069 ~ GI:4154613	26695|111| ~ A45|1094| ~ J99|112|	hypothetical_protein	H13-1
6	0	0	GI:409893580 ~ GI:443620490 ~ GI:4155556	26695|407| ~ A45|521| ~ J99|978|	MscS_family_inner_membrane_protein_YnaI	H13-1
6	0	0	GI:409893377 ~ GI:443620978 ~ GI:4154720	26695|210| ~ A45|1004| ~ J99|206|	Glucose-inhibited_division_protein_A	H13-1
24	4	3	GI:409893374 ~ GI:443620981 ~ GI:4154717	26695|207| ~ A45|1007| ~ J99|203|	High_temperature_protein_G	H13-1
1	0	0	GI:443620220 ~ GI:4155899	A45|270| ~ J99|1304|	Modification_methylase_MboII ~ Modification_methylase_DpnIIB	H13-1
32	1	1	GI:409893271 ~ GI:443621074 ~ GI:4154608	26695|106| ~ A45|1099| ~ J99|107|	Heat_shock_protein_70	H13-1
1	0	0	GI:409893550 ~ GI:443620464 ~ GI:4155576	26695|379| ~ A45|497| ~ J99|1003|	Primosomal_protein_N'	H13-1
9	0	0	GI:409893518 ~ GI:443620912 ~ GI:4154849	26695|347| ~ A45|943| ~ J99|339|	1-deoxy-D-xylulose-5-phosphate_synthase	H13-1
9	1	1	GI:409893559 ~ GI:443620473 ~ GI:4155574	26695|388| ~ A45|506| ~ J99|994|	3-octaprenyl-4-hydroxybenzoate_carboxy-lyase	H13-1
12	1	1	GI:409893587 ~ GI:443620497 ~ GI:4155545	26695|414| ~ A45|528| ~ J99|971|	Biosynthetic_arginine_decarboxylase	H13-1
7	1	1	GI:409894038 ~ GI:443621496 ~ GI:4155387	26695|879| ~ A45|1520| ~ J99|829|	hypothetical_protein	H13-1
12	0	0	GI:409893285 ~ GI:443621062 ~ GI:4154621	26695|119| ~ A45|1088| ~ J99|118|	Threonine--tRNA_ligase_2	H13-1
0	2	2	GI:409894431 ~ GI:443620539 ~ GI:4155782	26695|1265| ~ A45|567| ~ J99|1200|	NADH-quinone_oxidoreductase_subunit_L	H13-1
10	1	1	GI:409894254 ~ GI:443620230 ~ GI:4155606	26695|1097| ~ A45|278| ~ J99|1034|	Phosphogluconate_dehydratase	H13-1
4	0	0	GI:409894274 ~ GI:443620251 ~ GI:4155652	26695|1116| ~ A45|297| ~ J99|1055|	Flagellar_hook-associated_protein_1 ~ flagellar_hook-associated_protein_FlgK	H13-1
6	0	0	GI:409893519 ~ GI:443620911 ~ GI:4154850	26695|348| ~ A45|942| ~ J99|340|	Elongation_factor_4	H13-1
22	0	0	GI:409893639 ~ GI:443620178 ~ GI:4154969	26695|474| ~ A45|231| ~ J99|443|	Tyrosine_phosphorylated_protein_A	H13-1
7	0	0	GI:409894696 ~ GI:443620693 ~ GI:4156041	26695|1520| ~ A45|723| ~ J99|1428|	Glutamine--fructose-6-phosphate_aminotransferase_[isomerizing]	H13-1
1	0	0	GI:409893241 ~ GI:443621104 ~ GI:4154574	26695|78| ~ A45|1127| ~ J99|77|	hypothetical_protein	H13-1
3	0	0	GI:409893992 ~ GI:443621170 ~ GI:4155344	26695|836| ~ A45|1193| ~ J99|790|	long-chain_fatty_acid_outer_membrane_transporter	H13-1
1	0	0	GI:409893873 ~ GI:443621290 ~ GI:4155207	26695|715| ~ A45|1315| ~ J99|669|	DNA_polymerase_III_subunit_tau	H13-1
4	0	0	NA ~ GI:443621080 ~ GI:4154615	26695|101| ~ A45|1104| ~ J99|102|	Trifunctional_nucleotide_phosphoesterase_protein_YfkN_precursor	H13-1
20	0	0	GI:409893779 ~ GI:443621386 ~ GI:4155111	26695|616| ~ A45|1415| ~ J99|573|	Aspartate--tRNA_ligase	H13-1
25	0	0	GI:409893629 ~ GI:443620815 ~ GI:4154958	26695|464| ~ A45|846| ~ J99|433|	Oligoendopeptidase_F,_plasmid	H13-1
10	0	0	GI:409893795 ~ GI:443621370 ~ GI:4155116	26695|632| ~ A45|1398| ~ J99|589|	Quinone-reactive_Ni/Fe-hydrogenase_large_chain	H13-1
2	0	0	GI:409894366 ~ GI:443620343 ~ GI:4155732	26695|1202| ~ A45|383| ~ J99|1138|	Heterocyst_differentiation_ATP-binding_protein_HepA	H13-1
6	1	0	GI:409893403 ~ GI:443620091 ~ GI:4154734	26695|234| ~ A45|150| ~ J99|231|	Proline--tRNA_ligase	H13-1
3	0	0	GI:409893808 ~ GI:443621356 ~ GI:4155133	26695|645| ~ A45|1382| ~ J99|603|	Soluble_lytic_murein_transglycosylase_precursor	H13-1
29	0	0	GI:409893233 ~ GI:443621112 ~ GI:4154576	26695|70| ~ A45|1136| ~ J99|70|	Urease_subunit_beta	H13-1
4	1	0	GI:409893515 ~ GI:443620915 ~ GI:4154846	26695|344| ~ A45|946| ~ J99|336|	Flagellar_M-ring_protein	H13-1
2	0	0	GI:409893459 ~ GI:443620106 ~ GI:4154803	26695|288| ~ A45|162| ~ J99|286|	Para-aminobenzoate_synthase_component_1	H13-1
24	1	1	GI:409894273 ~ GI:443620250 ~ GI:4155635	26695|1115| ~ A45|296| ~ J99|1054|	Gamma-glutamyltranspeptidase_precursor	H13-1
12	1	1	GI:409893264 ~ GI:443621081 ~ GI:4154603	26695|100| ~ A45|1105| ~ J99|101|	Methyl-accepting_chemotaxis_protein_4	H13-1
5	0	0	GI:409894069	26695|912|	Hemin_receptor_precursor	H13-1
5	0	0	GI:409894016 ~ GI:443620152 ~ GI:4155361	26695|860| ~ A45|208| ~ J99|810|	Plasminogen-binding_protein_PgbB	H13-1
20	1	1	GI:409893562 ~ GI:443620476 ~ GI:4155561	26695|391| ~ A45|509| ~ J99|991|	hypothetical_protein	H13-1
2	1	0	GI:409894237 ~ GI:443620896 ~ GI:4154873	26695|1080| ~ A45|925| ~ J99|354|	Lipid_A_export_ATP-binding/permease_protein_MsbA	H13-1
5	0	0	GI:409893301 ~ GI:409893302 ~ GI:443621046 ~ GI:443621047 ~ GI:4154649 ~ GI:4154650	26695|134| ~ 26695|135| ~ A45|1072| ~ A45|1073| ~ J99|133| ~ J99|134|	L-lactate_permease	H13-1
2	1	1	GI:409893452 ~ GI:443620113 ~ GI:4154795	26695|281| ~ A45|169| ~ J99|279|	ATP-dependent_zinc_metalloprotease_FtsH	H13-1
2	0	0	GI:409894003 ~ GI:4155366	26695|847| ~ J99|799|	putative_type_I_restriction_enzymeP_M_protein	H13-1
10	1	1	GI:409893464 ~ GI:443620959 ~ GI:4154808	26695|293| ~ A45|988| ~ J99|291|	Hemin-binding_lipoprotein	H13-1
7	1	1	GI:409894613 ~ GI:443620702 ~ GI:4155955	26695|1440| ~ A45|731| ~ J99|1351|	Oxa1Ec	H13-1
2	0	0	GI:409894656 ~ GI:443620655 ~ GI:4156016	26695|1481| ~ A45|679| ~ J99|1392|	Sulfate_permease_CysP	H13-1
45	0	0	GI:409893172 ~ GI:443619997 ~ GI:4154502	26695|8| ~ A45|62| ~ J99|8|	hypothetical_protein	H13-1
4	0	0	GI:409894321 ~ GI:443620306 ~ GI:4155679	26695|1163| ~ A45|349| ~ J99|1101|	Glucose-6-phosphate_isomerase	H13-1
10	0	0	GI:409893486 ~ GI:443620940 ~ GI:4154833	26695|313| ~ A45|970| ~ J99|311|	Arginine--tRNA_ligase	H13-1
4	1	0	GI:409894068 ~ GI:443621525 ~ GI:4155421	26695|911| ~ A45|1546| ~ J99|861|	Putative_outer_membrane_protein	H13-1
14	0	0	GI:409893513 ~ GI:443620917 ~ GI:4154844	26695|342| ~ A45|948| ~ J99|334|	CTP_synthase	H13-1
3	0	0	GI:409893691 ~ GI:4155009	26695|526| ~ J99|490|	hypothetical_protein	H13-1
8	1	1	GI:409894006 ~ GI:443620142 ~ GI:4155369	26695|850| ~ A45|198| ~ J99|802|	putative_ABC_transporter_ATP-binding_protein_YheS	H13-1
12	0	0	GI:409893915 ~ GI:443621245 ~ GI:4155263	26695|758| ~ A45|1271| ~ J99|712|	Ribonuclease_Y	H13-1
23	2	2	GI:409893647 ~ GI:443620175 ~ GI:4154973	26695|483| ~ A45|228| ~ J99|450|	Putative_outer_membrane_protein	H13-1
9	0	0	GI:409894715 ~ GI:443620762 ~ GI:4156069	26695|1537| ~ A45|791| ~ J99|1459|	preprotein_translocase_subunit_SecD	H13-1
17	0	0	GI:409893560 ~ GI:443620474 ~ GI:4155559	26695|389| ~ A45|507| ~ J99|993|	D-3-phosphoglycerate_dehydrogenase	H13-1
3	0	0	GI:409894556 ~ GI:443620740 ~ GI:4156063	26695|1386| ~ A45|769| ~ J99|1443|	Recombination_protein_N	H13-1
12	1	1	GI:409894067 ~ GI:443621524 ~ GI:4155420	26695|910| ~ A45|1545| ~ J99|860|	Helicobacter_outer_membrane_protein	H13-1
6	0	0	GI:409893450 ~ GI:443620115 ~ GI:4154793	26695|279| ~ A45|171| ~ J99|277|	Mechanosensitive_ion_channel	H13-1
4	0	0	GI:409893690 ~ GI:4155008	26695|525| ~ J99|489|	type_IV_secretion_system_protein_VirB9	H13-1
11	3	3	GI:409894066 ~ GI:443621523 ~ GI:4155419	26695|909| ~ A45|1544| ~ J99|859|	Helicobacter_outer_membrane_protein	H13-1
1	0	0	GI:4155411	J99|852|	Phosphate_acetyltransferase	H13-1
1	0	0	NA	26695|444|	hypothetical_protein	H13-1
1	0	0	NA	26695|320|	N-acylneuraminate_cytidylyltransferase	H13-1
2	0	0	GI:409893416 ~ GI:443620079 ~ GI:4154751	26695|246| ~ A45|138| ~ J99|243|	Glutathione_import_ATP-binding_protein_GsiA	H13-1
14	0	0	GI:409893277 ~ GI:443621068 ~ GI:4154614	26695|112| ~ A45|1093| ~ J99|113|	Flagellin_N	H13-1
6	0	0	GI:443621527	A45|1548|	Brucella_heme_uptake_protein_A	H13-1
2	0	0	GI:409894432 ~ GI:443620540 ~ GI:4155783	26695|1266| ~ A45|568| ~ J99|1201|	NAD(P)H-quinone_oxidoreductase_chain_4_1 ~ NADH-quinone_oxidoreductase_subunit_M	H13-1
4	2	2	GI:409893522 ~ GI:443619977 ~ GI:4155615	26695|351| ~ A45|41| ~ J99|1030|	hypothetical_protein	H13-1
8	2	2	GI:409894653 ~ GI:443620653 ~ GI:4155991	26695|1479| ~ A45|677| ~ J99|1390|	type_I_secretion_outer_membrane_protein,_TolC_family	H13-1
19	0	0	GI:409893765 ~ GI:443621401 ~ GI:4155099	26695|600| ~ A45|1430| ~ J99|561|	Flagellin_A	H13-1
14	2	1	GI:409893574 ~ GI:443620487 ~ GI:4155553	26695|401| ~ A45|519| ~ J99|981|	GMP_synthase_[glutamine-hydrolyzing]	H13-1
4	0	0	GI:409893945 ~ GI:443621218 ~ GI:4155292	26695|788| ~ A45|1239| ~ J99|741|	Competence_protein_ComM	H13-1
4	0	0	GI:409893489	26695|316|	hypothetical_protein	H13-1
26	2	2	GI:409894028 ~ GI:4155380	26695|872| ~ J99|822|	Catalase	H13-1
30	0	0	GI:409894289 ~ GI:443620266 ~ GI:4155639	26695|1132| ~ A45|312| ~ J99|1071|	ATP_synthase_subunit_alpha	H13-1
3	0	0	GI:443620937 ~ GI:4154836	A45|967| ~ J99|314|	hypothetical_protein	H13-1
0	1	0	GI:409893352 ~ GI:443620993 ~ GI:4154695	26695|185| ~ A45|1019| ~ J99|182|	Major_cardiolipin_synthase_ClsA	H13-1
14	0	0	GI:409893344 ~ GI:443620988 ~ GI:4154685	26695|177| ~ A45|1014| ~ J99|176|	Lysine--tRNA_ligase	H13-1
4	0	0	GI:409894442 ~ GI:443620551 ~ GI:4155807	26695|1276| ~ A45|581| ~ J99|1211|	Anthranilate_synthase_component_1	H13-1
4	0	0	GI:409893941 ~ GI:443621221 ~ GI:4155290	26695|784| ~ A45|1242| ~ J99|738|	Putative_outer_membrane_protein	H13-1
1	0	0	GI:409893215 ~ GI:443621132 ~ GI:4154554	26695|52| ~ A45|1156| ~ J99|48|	Propionate_transporter	H13-1
26	2	2	GI:409893731 ~ GI:443621435 ~ GI:4155062	26695|567| ~ A45|1462| ~ J99|530|	Cytosol_aminopeptidase	H13-1
14	2	2	GI:409893627 ~ GI:443620817 ~ GI:4154956	26695|462| ~ A45|848| ~ J99|431|	CoB--CoM_heterodisulfide_reductase,_subunit_B	H13-1
2	0	0	GI:409893895 ~ GI:443621266 ~ GI:4155222	26695|738| ~ A45|1292| ~ J99|692|	UDP-N-acetylmuramoyl-tripeptide--D-alanyl-D-_alanine_ligase	H13-1
9	0	0	GI:409894132 ~ GI:443620434 ~ GI:4155486	26695|973| ~ A45|473| ~ J99|924|	Cell_division_protein_FtsA	H13-1
20	0	0	GI:409893413 ~ GI:443620082 ~ GI:4154758	26695|243| ~ A45|141| ~ J99|240|	DEAD-box_ATP-dependent_RNA_helicase_CshA	H13-1
2	1	1	GI:409894433 ~ GI:443620541 ~ GI:4155784	26695|1267| ~ A45|569| ~ J99|1202|	NADH-quinone_oxidoreductase_subunit_N	H13-1
5	2	1	GI:409894127 ~ GI:443620430 ~ GI:4155489	26695|969| ~ A45|469| ~ J99|920|	2,3-bisphosphoglycerate-independent_phosphoglycerate_mutase	H13-1
11	1	1	GI:409893757 ~ GI:443621408 ~ GI:4155079	26695|593| ~ A45|1436| ~ J99|555|	Disulfide_bond_formation_protein_DsbB	H13-1
3	0	0	GI:409893306 ~ GI:443621043 ~ GI:4154642	26695|139| ~ A45|1069| ~ J99|137|	hypothetical_protein	H13-1
5	0	0	GI:409894523 ~ GI:443620203 ~ GI:4155895	26695|1355| ~ A45|253| ~ J99|1287|	Replicative_DNA_helicase	H13-1
6	2	2	GI:409894131 ~ GI:443620433 ~ GI:4155485	26695|972| ~ A45|472| ~ J99|923|	Peptidyl-prolyl_cis-trans_isomerase_D	H13-1
11	2	2	GI:409893419 ~ GI:443620075 ~ GI:4154753	26695|248| ~ A45|136| ~ J99|245|	Helicobacter_outer_membrane_protein	H13-1
21	2	2	GI:409893259 ~ GI:443621086 ~ GI:4154598	26695|95| ~ A45|1110| ~ J99|96|	Threonine_synthase	H13-1
7	1	1	GI:409893444 ~ GI:443620121 ~ GI:4154784	26695|273| ~ A45|177| ~ J99|271|	Guanosine-5'-triphosphate,3'-diphosphate_pyrophosphatase	H13-1
8	0	0	GI:409893394 ~ GI:443620101 ~ GI:4154740	26695|225| ~ A45|160| ~ J99|222|	Helicobacter_outer_membrane_protein	H13-1
12	1	0	GI:409893299 ~ GI:443621049 ~ GI:4154633	26695|132| ~ A45|1075| ~ J99|131|	Lactate_utilization_protein_B	H13-1
21	1	1	GI:409893671 ~ GI:443621457 ~ GI:4155001	26695|509| ~ A45|1483| ~ J99|473|	3-hydroxylaminophenol_mutase	H13-1
5	1	0	GI:409893683 ~ GI:4155014	26695|519| ~ J99|483|	hypothetical_protein	H13-1
22	0	0	GI:409893983 ~ GI:443621180 ~ GI:4155333	26695|826| ~ A45|1202| ~ J99|781|	Inosine-5'-monophosphate_dehydrogenase	H13-1
3	1	0	GI:409894238 ~ GI:443620897 ~ GI:4154874	26695|1081| ~ A45|926| ~ J99|353|	Putative_outer_membrane_protein	H13-1
2	0	0	GI:409893448 ~ GI:443620117 ~ GI:4154791	26695|277| ~ A45|173| ~ J99|275|	TrkA-C_domain_protein	H13-1
13	1	0	GI:409893769 ~ GI:443621397 ~ GI:4155090	26695|604| ~ A45|1426| ~ J99|565|	type_I_secretion_outer_membrane_protein,_TolC_family	H13-1
1	0	0	GI:443620723	A45|751|	hypothetical_protein	H13-1
2	1	1	GI:409893542 ~ GI:409893814 ~ GI:4155580 ~ GI:4155139	26695|371| ~ 26695|651| ~ J99|1011| ~ J99|609|	Glycosyltransferase_family_10_(fucosyltransferase)	H13-1
24	1	1	GI:409894173 ~ GI:443620832 ~ GI:4154933	26695|1018| ~ A45|863| ~ J99|415|	Periplasmic_serine_endoprotease_DegP_precursor	H13-1
9	0	0	GI:409893822 ~ GI:443621344 ~ GI:4155155	26695|658| ~ A45|1370| ~ J99|616|	Aspartyl/glutamyl-tRNA(Asn/Gln)_amidotransferase_subunit_B	H13-1
10	0	0	GI:409893420 ~ GI:443620074 ~ GI:4154754	26695|249| ~ A45|135| ~ J99|246|	Helicobacter_outer_membrane_protein	H13-1
3	1	0	GI:409894322 ~ GI:443620305 ~ GI:4155692	26695|1164| ~ A45|348| ~ J99|1102|	Putative_outer_membrane_protein	H13-1
5	1	1	GI:409893202 ~ GI:443621141 ~ GI:4154546	26695|40| ~ A45|1165| ~ J99|38|	Alginate_biosynthesis_protein_AlgA	H13-1
1	0	0	GI:409893926 ~ GI:443621236 ~ GI:4155265	26695|769| ~ A45|1257| ~ J99|723|	N-acetylmuramoyl-L-alanine_amidase_AmiC_precursor	H13-1
20	0	0	GI:409893812 ~ GI:443621353 ~ GI:4155137	26695|649| ~ A45|1379| ~ J99|607|	Aspartate_ammonia-lyase	H13-1
28	1	1	GI:409894287 ~ GI:443620264 ~ GI:4155651	26695|1130| ~ A45|310| ~ J99|1069|	ATP_synthase_subunit_beta	H13-1
1	0	0	GI:409894524 ~ GI:443620204 ~ GI:4155896	26695|1356| ~ A45|254| ~ J99|1288|	Nicotinamide_nucleotide_repair_protein	H13-1
4	0	0	GI:409893648 ~ GI:443620174 ~ GI:4154974	26695|484| ~ A45|227| ~ J99|451|	Putative_outer_membrane_protein	H13-1
10	2	2	GI:409894040 ~ GI:443621498 ~ GI:4155389	26695|881| ~ A45|1522| ~ J99|831|	Cysteine--tRNA_ligase	H13-1
5	0	0	GI:409894011 ~ GI:443620147 ~ GI:4155356	26695|855| ~ A45|203| ~ J99|805|	Bifunctional_protein_HldE	H13-1
7	0	0	GI:409893635 ~ GI:443620809 ~ GI:4154965	26695|470| ~ A45|840| ~ J99|439|	Glutamate--tRNA_ligase	H13-1
15	1	1	GI:409894485 ~ GI:443620597 ~ GI:4155857	26695|1318| ~ A45|625| ~ J99|1251|	Fumarate_hydratase_class_II	H13-1
9	0	0	GI:409893988 ~ GI:443621175 ~ GI:4155327	26695|831| ~ A45|1197| ~ J99|786|	GTP-binding_protein_EngA	H13-1
13	1	1	GI:409894435 ~ GI:443620543 ~ GI:4155786	26695|1269| ~ A45|571| ~ J99|1204|	Phosphomannomutase/phosphoglucomutase	H13-1
9	0	0	GI:409893668 ~ GI:443621472 ~ GI:4154999	26695|506| ~ A45|1500| ~ J99|471|	putative_FAD-linked_oxidoreductase	H13-1
11	0	0	GI:409893533 ~ GI:443620446 ~ GI:4155591	26695|362| ~ A45|480| ~ J99|1020|	Biotin_carboxylase	H13-1
3	0	0	GI:409894673 ~ GI:443620673 ~ GI:4156022	26695|1497| ~ A45|699| ~ J99|1408|	Putative_electron_transport_protein_YccM	H13-1
5	0	0	GI:409894190 ~ GI:443620848 ~ GI:4154928	26695|1034| ~ A45|879| ~ J99|399|	Flagella-associated_GTP-binding_protein	H13-1
3	0	0	GI:409894693 ~ GI:443620690 ~ GI:4156038	26695|1517| ~ A45|720| ~ J99|1425|	Chromosomal_replication_initiator_protein_DnaA	H13-1
9	0	0	GI:409893829 ~ GI:443621337 ~ GI:4155149	26695|665| ~ A45|1363| ~ J99|623|	Oxygen-independent_coproporphyrinogen-III_oxidase	H13-1
5	0	0	GI:409893248 ~ GI:443621097 ~ GI:4154590	26695|84| ~ A45|1121| ~ J99|83|	hypothetical_protein	H13-1
2	0	0	GI:409893293 ~ GI:443621055 ~ GI:4154627	26695|126| ~ A45|1081| ~ J99|125|	L-serine_dehydratase_1	H13-1
21	2	2	GI:409894510 ~ GI:443620189 ~ GI:4155883	26695|1343| ~ A45|240| ~ J99|1275|	Carboxy-terminal_processing_protease_CtpB_precursor	H13-1
7	1	0	GI:409893984 ~ GI:443621179 ~ GI:4155334	26695|827| ~ A45|1201| ~ J99|782|	Glutamyl-tRNA(Gln)_amidotransferase_subunit_A	H13-1
3	0	0	GI:409894439 ~ GI:443620548 ~ GI:4155804	26695|1273| ~ A45|578| ~ J99|1208|	Tryptophan_biosynthesis_protein_TrpCF	H13-1
14	1	1	GI:409894535 ~ GI:443620211 ~ GI:4155892	26695|1367| ~ A45|261| ~ J99|1295|	ATP-dependent_Clp_protease_ATP-binding_subunit_ClpX	H13-1
28	0	0	GI:409893948 ~ GI:443621215 ~ GI:4155287	26695|791| ~ A45|1236| ~ J99|744|	Trigger_factor	H13-1
2	1	1	GI:409894615 ~ GI:443620700 ~ GI:4155957	26695|1442| ~ A45|729| ~ J99|1353|	tRNA_modification_GTPase_MnmE	H13-1
1	0	0	GI:409894686 ~ NA	26695|1511| ~ J99|1419|	putative_methyltransferase	H13-1
19	0	0	GI:409893247 ~ GI:443621098 ~ GI:4154589	26695|83| ~ A45|1122| ~ J99|82|	Malate:quinone_oxidoreductase	H13-1
6	0	0	GI:409893667 ~ GI:443621473 ~ GI:4154998	26695|505| ~ A45|1501| ~ J99|470|	Plasminogen-binding_protein_PgbA	H13-1
3	0	0	NA ~ GI:443620654 ~ GI:4155992	26695|1480| ~ A45|678| ~ J99|1391|	Magnesium_and_cobalt_efflux_protein_CorC	H13-1
3	0	0	GI:409893786 ~ GI:443621379 ~ GI:4155106	26695|623| ~ A45|1408| ~ J99|581|	UDP-N-acetylmuramate--L-alanine_ligase	H13-1
2	0	0	GI:409893405 ~ GI:443620090 ~ GI:4154735	26695|235| ~ A45|149| ~ J99|232|	Glutamyl-tRNA_reductase	H13-1
12	1	1	GI:409893295 ~ GI:443621053 ~ GI:4154629	26695|128| ~ A45|1079| ~ J99|127|	Phospho-2-dehydro-3-deoxyheptonate_aldolase	H13-1
15	0	0	GI:409893543 ~ GI:443620457 ~ GI:4155581	26695|372| ~ A45|490| ~ J99|1010|	NAD(P)-specific_glutamate_dehydrogenase	H13-1
4	0	0	GI:409893388 ~ GI:443620969 ~ GI:4154730	26695|220| ~ A45|995| ~ J99|217|	Lon_protease_2	H13-1
19	1	1	GI:409894307 ~ GI:443620320 ~ GI:4155673	26695|1149| ~ A45|363| ~ J99|1087|	hypothetical_protein	H13-1
3	1	1	GI:409894659 ~ GI:443620658 ~ GI:4156007	26695|1484| ~ A45|682| ~ J99|1395|	UDP-N-acetylmuramoyl-L-alanyl-D-glutamate--L-_lysine_ligase	H13-1
2	1	1	GI:409893180 ~ GI:443620005 ~ GI:4154518	26695|16| ~ A45|70| ~ J99|16|	hypothetical_protein	H13-1
5	1	1	GI:409893236 ~ GI:443621109 ~ GI:4154579	26695|73| ~ A45|1133| ~ J99|73|	Phosphoglucosamine_mutase	H13-1
16	1	1	GI:409894167 ~ GI:443620826 ~ GI:4154947	26695|1011| ~ A45|857| ~ J99|421|	protease3	H13-1
16	2	1	GI:409893676 ~ GI:443621463 ~ GI:4154993	26695|514| ~ A45|1489| ~ J99|477|	ATP-dependent_protease_ATPase_subunit_ClpY	H13-1
11	0	0	GI:409894349 ~ GI:443620280 ~ GI:4155714	26695|1186| ~ A45|325| ~ J99|1123|	Histidine--tRNA_ligase	H13-1
1	0	0	GI:443621023 ~ GI:4154652	A45|1049| ~ J99|157|	Sensor_protein_PfeS	H13-1
7	1	1	GI:409893569 ~ GI:443620483 ~ GI:4155567	26695|397| ~ A45|515| ~ J99|985|	putative_cysteine_desulfurase	H13-1
1	0	0	GI:409894209 ~ GI:443620867 ~ GI:4154905	26695|1053| ~ A45|898| ~ J99|381|	hypothetical_protein	H13-1
4	1	1	GI:409894266 ~ GI:443620243 ~ GI:4155619	26695|1109| ~ A45|290| ~ J99|1047|	Adenylosuccinate_lyase	H13-1
10	3	3	GI:409893806 ~ GI:443621358 ~ GI:4155131	26695|643| ~ A45|1384| ~ J99|601|	Glutamate--tRNA_ligase_1	H13-1
1	0	0	GI:409893889 ~ GI:443621272 ~ GI:4155233	26695|732| ~ A45|1298| ~ J99|686|	Ribosomal_protein_S12_methylthiotransferase_RimO	H13-1
1	0	0	GI:409894130 ~ GI:443620432 ~ GI:4155491	26695|971| ~ A45|471| ~ J99|922|	Adenosylmethionine-8-amino-7-oxononanoate_aminotransferase	H13-1
1	1	1	GI:409894717 ~ GI:443620764 ~ GI:4156071	26695|1539| ~ A45|793| ~ J99|1457|	Sodium/proton_antiporter_NhaA	H13-1
5	2	1	GI:409894230 ~ GI:443620889 ~ GI:4154876	26695|1073| ~ A45|918| ~ J99|361|	hypothetical_protein	H13-1
9	1	1	GI:409893712 ~ GI:443621454 ~ GI:4155037	26695|548| ~ A45|1480| ~ J99|509|	hypothetical_protein	H13-1
4	0	0	GI:409893435 ~ GI:443620130 ~ GI:4154788	26695|264| ~ A45|186| ~ J99|262|	(Dimethylallyl)adenosine_tRNA_methylthiotransferase_MiaB	H13-1
1	0	0	GI:409894555 ~ GI:443620741 ~ GI:4156062	26695|1385| ~ A45|770| ~ J99|1444|	hypothetical_protein	H13-1
16	0	0	GI:409893820 ~ GI:443621345 ~ GI:4155154	26695|657| ~ A45|1371| ~ J99|615|	Peptidase_M16_inactive_domain_protein	H13-1
1	0	0	GI:409894582 ~ GI:443620051 ~ GI:4155920	26695|1412| ~ A45|115| ~ J99|1325|	Flagellum-specific_ATP_synthase	H13-1
2	0	0	GI:409894194 ~ GI:443620852 ~ GI:4154914	26695|1038| ~ A45|883| ~ J99|395|	Lipid_A_core_-_O-antigen_ligase	H13-1
6	0	0	GI:409894298 ~ GI:443620275 ~ GI:4155657	26695|1141| ~ A45|321| ~ J99|1080|	hypothetical_protein	H13-1
24	0	0	GI:409893762 ~ GI:443621403 ~ GI:4155097	26695|597| ~ A45|1432| ~ J99|559|	Chemotaxis_regulator_BdlA	H13-1
2	0	0	GI:409893843 ~ GI:443621323 ~ GI:4155177	26695|682| ~ A45|1347| ~ J99|638|	Bifunctional_protein_GlmU	H13-1
1	0	0	GI:409894259 ~ GI:443620235 ~ GI:4155621 ~ GI:4155618	26695|1102| ~ A45|283| ~ J99|1039| ~ J99|1040|	Glycosyl_transferase_family_8 ~ lipopolysaccharide_1,3-galactosyltransferase	H13-1
15	0	0	GI:409893441 ~ GI:443620124 ~ GI:4154781	26695|270| ~ A45|180| ~ J99|268|	PPR_repeat	H13-1
11	1	1	GI:409893472 ~ GI:443620951 ~ GI:4154823	26695|301| ~ A45|980| ~ J99|300|	Glutamate-1-semialdehyde_2,1-aminomutase	H13-1
4	0	0	GI:409893935 ~ GI:443621227 ~ GI:4155283	26695|778| ~ A45|1248| ~ J99|732|	hypothetical_protein	H13-1
3	0	0	GI:409893564 ~ GI:443620478 ~ GI:4155563	26695|393| ~ A45|511| ~ J99|989|	3-phosphoshikimate_1-carboxyvinyltransferase_1	H13-1
21	1	1	GI:409893187 ~ GI:443621159 ~ GI:4154527	26695|22| ~ A45|1183| ~ J99|22|	Citrate_synthase	H13-1
14	0	0	GI:409893317 ~ GI:443621033 ~ GI:4154655	26695|150| ~ A45|1058| ~ J99|148|	Enolase	H13-1
29	2	2	GI:409893188 ~ GI:443621158 ~ GI:4154528	26695|23| ~ A45|1182| ~ J99|23|	Isocitrate_dehydrogenase_[NADP]	H13-1
4	0	0	GI:409894255 ~ GI:443620231 ~ GI:4155607	26695|1098| ~ A45|279| ~ J99|1035|	Glucose-6-phosphate_1-dehydrogenase	H13-1
3	1	1	GI:409893994 ~ GI:443621168 ~ GI:4155346	26695|838| ~ A45|1191| ~ J99|792|	DNA/pantothenate_metabolism_flavoprotein	H13-1
1	0	0	GI:409893342 ~ GI:443620986 ~ GI:4154683	26695|175| ~ A45|1012| ~ J99|174|	Apolipoprotein_N-acyltransferase ~ apolipoprotein_N-acyltransferase	H13-1
10	0	0	GI:409894376 ~ GI:443620354 ~ GI:4155729	26695|1213| ~ A45|394| ~ J99|1148|	Phosphoribosylamine--glycine_ligase	H13-1
1	0	0	GI:409894527	26695|1359|	Type-2_restriction_enzyme_MboII	H13-1
4	0	0	GI:409893330 ~ GI:443621019 ~ GI:4154671	26695|164| ~ A45|1045| ~ J99|161|	putative_protease_YhbU_precursor	H13-1
6	0	0	GI:409893811 ~ GI:443621354 ~ GI:4155136	26695|648| ~ A45|1380| ~ J99|606|	UDP-N-acetylglucosamine_1-carboxyvinyltransferase	H13-1
2	0	0	GI:409893655 ~ GI:443621485 ~ GI:4154982	26695|491| ~ A45|1510| ~ J99|458|	UDP-N-acetylmuramoylalanine--D-glutamate_ligase	H13-1
14	0	0	GI:409893975 ~ GI:443621187 ~ GI:4155323	26695|819| ~ A45|1209| ~ J99|774|	Homoserine_dehydrogenase	H13-1
1	0	0	GI:409894460 ~ GI:443620572 ~ GI:4155830	26695|1294| ~ A45|600| ~ J99|1228|	preprotein_translocase_subunit_SecY	H13-1
8	0	0	GI:409893901 ~ GI:443621259 ~ GI:4155250	26695|744| ~ A45|1286| ~ J99|698|	Fibronectin_type_III_domain_protein	H13-1
1	2	1	GI:409894337 ~ GI:443620289 ~ GI:4155703	26695|1176| ~ A45|334| ~ J99|1114|	Nucleoside_permease_NupX	H13-1
8	1	1	GI:409894282 ~ GI:443620259 ~ GI:4155646	26695|1124| ~ A45|305| ~ J99|1064|	translocation_protein_TolB	H13-1
1	0	0	GI:409894125 ~ GI:443620427 ~ GI:4155476	26695|966| ~ A45|466| ~ J99|917|	Outer_membrane_efflux_protein	H13-1
5	1	1	GI:409893724 ~ GI:443621442 ~ GI:4155049	26695|560| ~ A45|1469| ~ J99|521|	hypothetical_protein	H13-1
13	0	0	GI:409893345 ~ GI:443620989 ~ GI:4154686	26695|178| ~ A45|1015| ~ J99|177|	Serine_hydroxymethyltransferase	H13-1
3	0	0	GI:409893823 ~ GI:443621343 ~ GI:4155156	26695|659| ~ A45|1369| ~ J99|617|	peptidyl-prolyl_cis-trans_isomerase_SurA	H13-1
4	0	0	GI:409894644 ~ GI:443620644 ~ GI:4155982	26695|1470| ~ A45|668| ~ J99|1381|	Serine--tRNA_ligase	H13-1
1	0	0	GI:409893870 ~ GI:443621293 ~ GI:4155204	26695|712| ~ A45|1318| ~ J99|666|	RNA_polymerase_sigma-54_factor_1	H13-1
1	0	0	GI:409893294 ~ GI:443621054 ~ GI:4154628	26695|127| ~ A45|1080| ~ J99|126|	Serine_transporter	H13-1
4	0	0	GI:409894336 ~ GI:443620290 ~ GI:4155702	26695|1175| ~ A45|335| ~ J99|1113|	Phosphopentomutase	H13-1
14	0	0	GI:409893719 ~ GI:443621446 ~ GI:4155044	26695|556| ~ A45|1473| ~ J99|517|	3-oxoacyl-[acyl-carrier-protein]_synthase_2	H13-1
3	0	0	GI:409894704 ~ GI:443620751 ~ GI:4156093	26695|1526| ~ A45|780| ~ J99|1470|	Cytochrome_b	H13-1
5	0	0	GI:409893421 ~ GI:443620073 ~ GI:4154770	26695|250| ~ A45|134| ~ J99|247|	Adenylosuccinate_synthetase	H13-1
1	0	0	GI:4155484	J99|926|	hypothetical_protein	H13-1
9	0	0	GI:409894098 ~ GI:443620403 ~ GI:4155445	26695|939| ~ A45|439| ~ J99|890|	D-amino_acid_dehydrogenase_small_subunit	H13-1
3	0	0	GI:409893940 ~ GI:443621222 ~ GI:4155280	26695|783| ~ A45|1243| ~ J99|737|	Lipoprotein-releasing_system_transmembrane_protein_LolC ~ Lipoprotein-releasing_system_transmembrane_protein_LolE	H13-1
4	0	0	GI:409894174 ~ GI:443620833 ~ GI:4154934	26695|1019| ~ A45|864| ~ J99|414|	Bifunctional_enzyme_IspD/IspF	H13-1
11	0	0	GI:409893433 ~ GI:443620132 ~ GI:4154769	26695|262| ~ A45|188| ~ J99|260|	chlorohydrolase ~ 8-oxoguanine_deaminase	H13-1
8	1	1	GI:409894423 ~ GI:443620531 ~ GI:4155794	26695|1257| ~ A45|559| ~ J99|1192|	NADH-quinone_oxidoreductase_subunit_D	H13-1
1	0	0	GI:4154940	J99|424|	EcoKI_restriction-modification_system_protein_HsdS	H13-1
1	0	0	GI:409894671 ~ GI:443620671 ~ GI:4156004	26695|1495| ~ A45|697| ~ J99|1406|	Glutamate_permease	H13-1
15	1	1	GI:409894264 ~ GI:443620241 ~ GI:4155626	26695|1107| ~ A45|288| ~ J99|1045|	Pyruvate_synthase_subunit_PorA	H13-1
2	0	0	GI:409893545 ~ GI:443620459 ~ GI:4155583	26695|374| ~ A45|492| ~ J99|1008|	Protease_HtpX	H13-1
2	0	0	GI:409893869 ~ GI:443621297 ~ GI:4155202	26695|709| ~ A45|1321| ~ J99|664|	5'-nucleotidase	H13-1
6	1	0	GI:409893665 ~ GI:443621475 ~ GI:4154996	26695|503| ~ A45|1503| ~ J99|468|	Glycyl-glycine_endopeptidase_ALE-1_precursor	H13-1
9	0	0	GI:409893456 ~ GI:443620109 ~ GI:4154810	26695|285| ~ A45|165| ~ J99|283|	Diaminopimelate_decarboxylase	H13-1
11	1	1	GI:409894386 ~ GI:443620368 ~ GI:4155744	26695|1223| ~ A45|406| ~ J99|1158|	Aspartokinase	H13-1
1	1	0	GI:409893182 ~ GI:443620007 ~ GI:4154520	26695|18| ~ A45|72| ~ J99|18|	Carboxynorspermidine/carboxyspermidine_decarboxylase	H13-1
10	0	0	GI:409893928 ~ GI:443621234 ~ GI:4155267	26695|771| ~ A45|1255| ~ J99|725|	Tyrosine--tRNA_ligase	H13-1
25	1	1	GI:409894505 ~ GI:443620184 ~ GI:4155865	26695|1338| ~ A45|235| ~ J99|1270|	Phosphoglycerate_kinase	H13-1
9	0	0	GI:409893789 ~ GI:443621376 ~ GI:4155122	26695|626| ~ A45|1405| ~ J99|584|	2,3,4,5-tetrahydropyridine-2,6-dicarboxylate_N-succinyltransferase	H13-1
29	1	1	GI:409894365 ~ GI:443620342 ~ GI:4155731	26695|1201| ~ A45|382| ~ J99|1137|	Elongation_factor_Tu	H13-1
13	1	1	GI:409894672 ~ GI:443620672 ~ GI:4156021	26695|1496| ~ A45|698| ~ J99|1407|	Saccharopine_dehydrogenase	H13-1
10	0	0	GI:409894680 ~ GI:443620679 ~ GI:4156020	26695|1503| ~ A45|705| ~ J99|1414|	hypothetical_protein	H13-1
1	0	0	GI:409894710 ~ GI:443620757 ~ GI:4156079	26695|1532| ~ A45|786| ~ J99|1464|	Bifunctional_protein_FolC	H13-1
3	0	0	GI:409894438 ~ GI:443620547 ~ GI:4155803	26695|1272| ~ A45|577| ~ J99|1207|	Tryptophan_synthase_beta_chain	H13-1
11	3	3	GI:409893850 ~ GI:443621318 ~ GI:4155185	26695|689| ~ A45|1342| ~ J99|652|	Acetyl-CoA_acetyltransferase	H13-1
6	0	0	GI:409893333 ~ GI:443621016 ~ GI:4154674	26695|167| ~ A45|1042| ~ J99|164|	Molybdopterin_molybdenumtransferase	H13-1
9	2	2	GI:409893834 ~ GI:443621332 ~ GI:4155168	26695|672| ~ A45|1356| ~ J99|629|	Aspartate_aminotransferase	H13-1
10	2	1	GI:409893398 ~ GI:443620097 ~ GI:4154744	26695|229| ~ A45|156| ~ J99|226|	Bifunctional_glutathionylspermidine_synthetase/amidase	H13-1
2	0	0	GI:409894679 ~ GI:443620678 ~ GI:4156019	26695|1502| ~ A45|704| ~ J99|1413|	L-seryl-tRNA(Sec)_selenium_transferase	H13-1
5	0	0	GI:409893586 ~ GI:443620496 ~ GI:4155544	26695|413| ~ A45|527| ~ J99|972|	GDP-mannose-dependent_alpha-mannosyltransferase	H13-1
12	0	0	GI:409893581 ~ GI:443620491 ~ GI:4155557	26695|408| ~ A45|522| ~ J99|977|	Cyclopropane-fatty-acyl-phospholipid_synthase	H13-1
12	2	1	GI:409894666 ~ GI:443620666 ~ GI:4156014	26695|1490| ~ A45|692| ~ J99|1401|	Helicobacter_outer_membrane_protein	H13-1
3	1	1	GI:409893376 ~ GI:443620979 ~ GI:4154719	26695|209| ~ A45|1005| ~ J99|205|	Succinyl-diaminopimelate_desuccinylase	H13-1
2	0	0	GI:409894509 ~ GI:443620188 ~ GI:4155882	26695|1342| ~ A45|239| ~ J99|1274|	hypothetical_protein	H13-1
19	1	0	GI:409893385 ~ GI:443620972 ~ GI:4154727	26695|217| ~ A45|998| ~ J99|214|	Cysteine_desulfurase	H13-1
7	1	0	GI:409894133 ~ GI:443620435 ~ GI:4155487	26695|974| ~ A45|474| ~ J99|925|	Cell_division_protein_FtsZ	H13-1
22	0	0	GI:409893359 ~ GI:443621000 ~ GI:4154690	26695|192| ~ A45|1026| ~ J99|189|	S-adenosylmethionine_synthase	H13-1
5	1	0	GI:409893891 ~ GI:443621270 ~ GI:4155235	26695|734| ~ A45|1296| ~ J99|688|	Soluble_hydrogenase_42_kDa_subunit	H13-1
2	0	0	GI:409893794 ~ GI:4155126	26695|631| ~ J99|588|	Quinone-reactive_Ni/Fe-hydrogenase_small_chain_precursor	H13-1
2	0	0	GI:409893410 ~ GI:443620085 ~ GI:4154755	26695|240| ~ A45|144| ~ J99|237|	Sensor_protein_ZraS	H13-1
9	0	0	GI:409893862 ~ GI:443621305 ~ GI:4155196	26695|702| ~ A45|1329| ~ J99|657|	Quorum-sensing_regulator_protein_F	H13-1
10	0	0	GI:409893203 ~ GI:443621140 ~ GI:4154547	26695|41| ~ A45|1164| ~ J99|39|	GDP-mannose_4,6-dehydratase	H13-1
3	0	0	GI:409893332 ~ GI:443621017 ~ GI:4154673	26695|166| ~ A45|1043| ~ J99|163|	Peptide_chain_release_factor_2	H13-1
1	0	0	GI:409894389 ~ GI:443620371 ~ GI:4155747	26695|1226| ~ A45|409| ~ J99|1161|	Dihydropteroate_synthase	H13-1
15	1	1	GI:443620165	A45|221|	Catalase	H13-1
7	0	0	GI:409893268 ~ GI:443621077 ~ GI:4154605	26695|103| ~ A45|1102| ~ J99|104|	Cystathionine_gamma-synthase	H13-1
6	2	1	GI:409894562 ~ GI:443620736 ~ GI:4156046	26695|1391| ~ A45|765| ~ J99|1437|	Alanine_dehydrogenase ~ Alanine_dehydrogenase_2	H13-1
6	0	0	GI:409893432 ~ GI:443620133 ~ GI:4154768	26695|261| ~ A45|189| ~ J99|259|	Dihydroorotase	H13-1
2	0	0	GI:409893528 ~ GI:443619971 ~ GI:4155598	26695|357| ~ A45|35| ~ J99|1024|	UDP-4-amino-4,_6-dideoxy-N-acetyl-beta-L-altrosamine_transaminase	H13-1
4	0	0	GI:409893651 ~ GI:443621489 ~ GI:4154977	26695|487| ~ A45|1514| ~ J99|454|	Voltage-gated_potassium_channel_Kch	H13-1
1	0	0	GI:409894096 ~ GI:443620401 ~ GI:4155452	26695|937| ~ A45|437| ~ J99|888|	Alanine_racemase	H13-1
2	0	0	GI:409894629 ~ GI:443620628 ~ GI:4155971	26695|1456| ~ A45|654| ~ J99|1367|	putative_phospholipid_ABC_transporter_permease_protein_MlaE	H13-1
3	0	0	GI:409893322 ~ GI:443621028 ~ GI:4154660	26695|155| ~ A45|1053| ~ J99|153|	lipopolysaccharide_1,3-galactosyltransferase ~ General_stress_protein_A	H13-1
5	2	2	NA ~ GI:443620429 ~ GI:4155488	26695|968| ~ A45|468| ~ J99|919|	hypothetical_protein	H13-1
1	0	0	GI:409894650 ~ GI:443620650 ~ GI:4155988	26695|1476| ~ A45|674| ~ J99|1387|	Inner_membrane_transport_permease_YbhS ~ Inner_membrane_transport_permease_YbhR	H13-1
9	0	0	GI:409893699 ~ GI:4155019	26695|533| ~ J99|496|	hypothetical_protein	H13-1
7	0	0	GI:409893787 ~ GI:443621378 ~ GI:4155107	26695|624| ~ A45|1407| ~ J99|582|	LL-diaminopimelate_aminotransferase	H13-1
10	0	0	GI:409894394 ~ GI:443620377 ~ GI:4155757	26695|1231| ~ A45|414| ~ J99|1166|	Carbamoyl-phosphate_synthase_small_chain	H13-1
19	0	0	GI:409893751 ~ GI:443621414 ~ GI:4155084	26695|587| ~ A45|1442| ~ J99|550|	2-oxoglutarate_oxidoreductase_subunit_KorA	H13-1
21	3	2	GI:409893661 ~ GI:443621479 ~ GI:4154988	26695|497| ~ A45|1504| ~ J99|464|	DNA_polymerase_III_subunit_beta	H13-1
4	0	0	GI:409893447 ~ GI:443620118 ~ GI:4154790	26695|276| ~ A45|174| ~ J99|274|	Queuine_tRNA-ribosyltransferase	H13-1
2	0	0	NA ~ GI:443619929	26695|471| ~ 26695|919| ~ A45|2| ~ J99|440| ~ J99|868|	Helicobacter_outer_membrane_protein	H13-1
1	0	0	GI:4155231	J99|684|	hypothetical_protein	H13-1
6	1	0	GI:409894492 ~ GI:443620604 ~ GI:4155852	26695|1325| ~ A45|632| ~ J99|1258|	Heat_shock_protein_J	H13-1
5	0	0	GI:409893261 ~ GI:443621084 ~ GI:4154600	26695|97| ~ A45|1108| ~ J99|98|	hypothetical_protein	H13-1
12	2	2	GI:409893370 ~ GI:443621008 ~ GI:4154712	26695|203| ~ A45|1035| ~ J99|199|	Cell_division_inhibitor_MinD	H13-1
2	0	0	GI:409893381 ~ GI:443620975 ~ GI:4154714	26695|213| ~ A45|1001| ~ J99|209|	1-deoxy-D-xylulose_5-phosphate_reductoisomerase	H13-1
1	0	0	GI:409894579 ~ GI:443620047 ~ GI:4155916	26695|1407| ~ A45|108| ~ J99|1320|	Glycosyl_transferase_family_8	H13-1
13	0	0	GI:409893730 ~ GI:443621436 ~ GI:4155073	26695|566| ~ A45|1463| ~ J99|529|	Ribosome-binding_ATPase_YchF	H13-1
1	0	0	GI:409893600	26695|431|	Type_IV_secretory_pathway,_TrbF_components	H13-1
2	0	0	GI:409893827 ~ GI:443621339 ~ GI:4155160	26695|663| ~ A45|1365| ~ J99|621|	Chorismate_synthase	H13-1
17	0	0	GI:409894258 ~ GI:443620234 ~ GI:4155620 ~ GI:4156045	26695|1101| ~ A45|282| ~ J99|1038| ~ J99|1438|	putative_formaldehyde_dehydrogenase_AdhA ~ NADP-dependent_alcohol_dehydrogenase_C_2	H13-1
1	0	0	GI:409893620	26695|456|	EcoKI_restriction-modification_system_protein_HsdS	H13-1
13	0	0	GI:409893927 ~ GI:443621235 ~ GI:4155266	26695|770| ~ A45|1256| ~ J99|724|	putative_enoyl-[acyl-carrier-protein]_reductase_II ~ Nitronate_monooxygenase	H13-1
10	0	0	GI:409893414 ~ GI:443620081 ~ GI:4154759	26695|244| ~ A45|140| ~ J99|241|	FtsH_protease_regulator_HflC	H13-1
10	1	0	GI:409893817 ~ GI:443621348 ~ GI:4155151	26695|654| ~ A45|1374| ~ J99|612|	FO_synthase_subunit_2	H13-1
1	0	0	GI:409894020 ~ GI:443620156 ~ GI:4155351	26695|864| ~ A45|212| ~ J99|814|	Lipid-A-disaccharide_synthase	H13-1
7	1	0	GI:409894495 ~ GI:443620607 ~ GI:4155868	26695|1328| ~ A45|635| ~ J99|1260|	tRNA-specific_2-thiouridylase_MnmA	H13-1
6	1	1	GI:409893469 ~ GI:443620954 ~ GI:4154802	26695|298| ~ A45|983| ~ J99|297|	GTP-binding_protein_obg	H13-1
8	0	0	GI:409893788 ~ GI:443621377 ~ GI:4155121	26695|625| ~ A45|1406| ~ J99|583|	4-hydroxy-3-methylbut-2-en-1-yl_diphosphate_synthase	H13-1
2	0	0	GI:409894124 ~ GI:443620426 ~ GI:4155475	26695|965| ~ A45|465| ~ J99|916|	membrane_fusion_protein_cluster_2_protein	H13-1
15	0	0	GI:409893389 ~ GI:443620968 ~ GI:4154731	26695|221| ~ A45|994| ~ J99|218|	Peptide_methionine_sulfoxide_reductase_msrA/msrB	H13-1
1	0	0	GI:409894588 ~ GI:443620057 ~ GI:4155932	26695|1420| ~ A45|123| ~ J99|1335|	putative_dual-specificity_RNA_methyltransferase_RlmN	H13-1
11	1	1	GI:409894192 ~ GI:443620850 ~ GI:4154912	26695|1036| ~ A45|881| ~ J99|397|	putative_peptidase	H13-1
15	2	2	GI:409894720 ~ GI:443620767 ~ GI:4156074	26695|1542| ~ A45|796| ~ J99|1454|	Elongation_factor_Ts	H13-1
5	0	0	GI:409893400 ~ GI:443620094 ~ GI:4154746	26695|231| ~ A45|153| ~ J99|228|	Putative_beta-lactamase_HcpC_precursor	H13-1
1	0	0	GI:409893885 ~ GI:443621278 ~ GI:4155228	26695|727| ~ A45|1304| ~ J99|681|	hypothetical_protein	H13-1
3	0	0	GI:409894186 ~ GI:443620844 ~ GI:4154924	26695|1030| ~ A45|875| ~ J99|403|	Flagellar_motor_switch_protein_FliM	H13-1
8	0	0	GI:409893819 ~ GI:443621346 ~ GI:4155153	26695|656| ~ A45|1372| ~ J99|614|	FO_synthase_subunit_2	H13-1
5	0	0	GI:409894310 ~ GI:443620317 ~ GI:4155666	26695|1152| ~ A45|360| ~ J99|1090|	UDP-N-acetylglucosamine--N-acetylmuramyl-_(pentapeptide)_pyrophosphoryl-undecaprenol_N-acetylglucosamine_transferase	H13-1
0	2	2	GI:409894444 ~ GI:443620554 ~ GI:4155808	26695|1278| ~ A45|584| ~ J99|1212|	Glycosyltransferase_family_9_(heptosyltransferase)	H13-1
3	0	0	GI:409893238 ~ GI:443621107 ~ GI:4154581	26695|75| ~ A45|1131| ~ J99|75|	Peptide_chain_release_factor_1	H13-1
4	0	0	GI:443620456	A45|489|	Glycosyltransferase_family_10_(fucosyltransferase)	H13-1
4	0	0	GI:409894166 ~ GI:443620825 ~ GI:4154946	26695|1010| ~ A45|856| ~ J99|422|	Dihydroorotate_dehydrogenase_(quinone)	H13-1
4	0	0	GI:409894624 ~ GI:443620623 ~ GI:4155966	26695|1451| ~ A45|649| ~ J99|1362|	Cytochrome_c551_peroxidase_precursor	H13-1
5	0	0	GI:409893879 ~ GI:443621284 ~ GI:4155215	26695|721| ~ A45|1310| ~ J99|676|	putative_L-asparaginase	H13-1
1	1	1	GI:409893424 ~ GI:443620070 ~ GI:4154773	26695|253| ~ A45|131| ~ J99|250|	Metalloprotease_MmpA	H13-1
7	1	1	GI:409893175 ~ GI:443620000 ~ GI:4154513	26695|11| ~ A45|65| ~ J99|11|	tRNA-specific_2-thiouridylase_MnmA	H13-1
1	0	0	GI:409894350 ~ GI:443620279 ~ GI:4155715	26695|1187| ~ A45|324| ~ J99|1124|	ADP-heptose--LPS_heptosyltransferase_2	H13-1
4	1	1	GI:409893893 ~ GI:443621268 ~ GI:4155237	26695|736| ~ A45|1294| ~ J99|690|	D-alanine--D-alanine_ligase	H13-1
2	0	0	GI:409894197 ~ GI:443620855 ~ GI:4154917	26695|1041| ~ A45|886| ~ J99|392|	putative_phosphohydrolase_(DHH_superfamily)	H13-1
14	0	0	GI:409894534 ~ GI:443620210 ~ GI:4155891	26695|1366| ~ A45|260| ~ J99|1294|	Rod_shape-determining_protein_MreB	H13-1
12	1	1	GI:409893316 ~ GI:443621034 ~ GI:4154654	26695|149| ~ A45|1059| ~ J99|147|	Recombinase_A	H13-1
6	0	0	GI:409894348 ~ GI:443620281 ~ GI:4155713	26695|1185| ~ A45|326| ~ J99|1122|	Aspartate-semialdehyde_dehydrogenase	H13-1
1	0	0	GI:409894217 ~ GI:443620875 ~ GI:4154891	26695|1061| ~ A45|906| ~ J99|373|	S-adenosylmethionine:tRNA_ribosyltransferase-isomerase	H13-1
6	0	0	GI:409893957 ~ GI:443621206 ~ GI:4155296	26695|800| ~ A45|1227| ~ J99|753|	Riboflavin_biosynthesis_protein_RibBA	H13-1
7	2	2	GI:409893523 ~ GI:443619976 ~ GI:4155609	26695|352| ~ A45|40| ~ J99|1029|	UDP-glucose_4-epimerase	H13-1
21	2	2	GI:409894453 ~ GI:443620565 ~ GI:4155841	26695|1287| ~ A45|594| ~ J99|1221|	DNA-directed_RNA_polymerase_subunit_alpha	H13-1
2	0	0	GI:409894670 ~ GI:443620670 ~ GI:4156003	26695|1494| ~ A45|696| ~ J99|1405|	bifunctional_diaminohydroxyphosphoribosylaminopyrimidine_deaminase/5-amino-6-(5-phosphoribosylamino)uracil_reductase	H13-1
3	1	1	GI:409893449 ~ GI:443620116 ~ GI:4154792	26695|278| ~ A45|172| ~ J99|276|	3-dehydroquinate_synthase	H13-1
4	0	0	GI:409893516 ~ GI:443620914 ~ GI:4154847	26695|345| ~ A45|945| ~ J99|337|	Flagellar_motor_switch_protein_G	H13-1
2	0	0	GI:409893412 ~ GI:443620083 ~ GI:4154757	26695|242| ~ A45|142| ~ J99|239|	Basal_body_P-ring_protein	H13-1
8	0	0	GI:409893527 ~ GI:443619972 ~ GI:4155613	26695|356| ~ A45|36| ~ J99|1025|	Ribonucleoside-diphosphate_reductase_subunit_beta	H13-1
10	2	2	GI:409894631 ~ GI:443620631 ~ GI:4155979	26695|1458| ~ A45|656| ~ J99|1369|	Branched-chain-amino-acid_transaminase_1	H13-1
2	0	0	GI:409894750 ~ GI:443620795 ~ GI:4156114	26695|1571| ~ A45|826| ~ J99|1501|	t(6)A37_threonylcarbamoyladenosine_biosynthesis_protein	H13-1
1	0	0	GI:409893445 ~ GI:443620120 ~ GI:4154785	26695|274| ~ A45|176| ~ J99|272|	Lipopolysaccharide_heptosyltransferase_1	H13-1
1	0	0	GI:409893340 ~ GI:443620984 ~ GI:4154681	26695|173| ~ A45|1010| ~ J99|172|	Pseudaminic_acid_synthase	H13-1
6	0	0	GI:409893742 ~ GI:443621424 ~ GI:4155058	26695|578| ~ A45|1451| ~ J99|541|	Dihydroorotase	H13-1
13	1	1	GI:409893768 ~ GI:443621398 ~ GI:4155089	26695|603| ~ A45|1427| ~ J99|564|	Uroporphyrinogen_decarboxylase	H13-1
11	0	0	GI:409893460 ~ GI:4154804	26695|289| ~ J99|287|	Aliphatic_amidase	H13-1
11	1	1	GI:409893363 ~ GI:443621004 ~ GI:4154706	26695|196| ~ A45|1030| ~ J99|193|	Phosphate_acyltransferase	H13-1
1	0	0	GI:409893824 ~ GI:443621342 ~ GI:4155157	26695|660| ~ A45|1368| ~ J99|618|	tetratricopeptide_repeat_protein	H13-1
4	0	0	GI:409894104 ~ GI:443620407 ~ GI:4155463	26695|944| ~ A45|443| ~ J99|894|	hypothetical_protein	H13-1
4	0	0	GI:409893858 ~ GI:443621309 ~ GI:4155192	26695|698| ~ A45|1333| ~ J99|653|	hypothetical_protein	H13-1
2	0	0	GI:409894517 ~ GI:443620197 ~ GI:4155875	26695|1349| ~ A45|247| ~ J99|1281|	Quinolinate_synthase_A	H13-1
6	0	0	GI:409893358 ~ GI:443620999 ~ GI:4154701	26695|191| ~ A45|1025| ~ J99|188|	UDP-3-O-acylglucosamine_N-acyltransferase	H13-1
9	0	0	GI:409894257 ~ GI:443620233 ~ GI:4155603	26695|1100| ~ A45|281| ~ J99|1037|	Glucokinase	H13-1
4	0	0	GI:443621314 ~ GI:4155189	A45|1338| ~ J99|648|	hypothetical_protein	H13-1
3	0	0	GI:409894214 ~ GI:443620872 ~ GI:4154888	26695|1058| ~ A45|903| ~ J99|376|	Holliday_junction_ATP-dependent_DNA_helicase_RuvB	H13-1
1	0	0	GI:409894440 ~ GI:443620549 ~ GI:4155805	26695|1274| ~ A45|579| ~ J99|1209|	Anthranilate_synthase_component_II	H13-1
8	1	1	GI:409894727 ~ GI:409894728 ~ GI:443620773 ~ GI:443620774 ~ GI:4156090 ~ GI:4156102	26695|1548| ~ 26695|1549| ~ A45|802| ~ A45|803| ~ J99|1479| ~ J99|1480|	corrinoid_ABC_transporter_substrate-binding_protein	H13-1
1	0	0	GI:409893539 ~ GI:443620452 ~ GI:4155597	26695|368| ~ A45|486| ~ J99|1014|	Ferrochelatase	H13-1
3	0	0	GI:409893465 ~ GI:443620958 ~ GI:4154809	26695|294| ~ A45|987| ~ J99|292|	Dipeptide_transport_system_permease_protein_DppB	H13-1
3	1	0	GI:409893993 ~ GI:443621169 ~ GI:4155345	26695|837| ~ A45|1192| ~ J99|791|	UDP-N-acetylglucosamine_4,6-dehydratase_(inverting)	H13-1
3	1	1	GI:409893206 ~ GI:443621138 ~ GI:4154539	26695|43| ~ A45|1162| ~ J99|41|	Hydrogenase_isoenzymes_formation_protein_HypE	H13-1
5	0	0	GI:409894075 ~ GI:443621531 ~ GI:4155430	26695|917| ~ A45|1552| ~ J99|866|	Glyceraldehyde-3-phosphate_dehydrogenase_1	H13-1
4	0	0	GI:409894280 ~ GI:443620257 ~ GI:4155644	26695|1122| ~ A45|303| ~ J99|1062|	tol-pal_system_protein_YbgF	H13-1
1	0	0	GI:409894232 ~ GI:443620891 ~ GI:4154878	26695|1075| ~ A45|920| ~ J99|359|	High-affinity_nickel-transport_protein_NixA	H13-1
10	0	0	GI:409893364 ~ GI:443621005 ~ GI:4154707	26695|197| ~ A45|1031| ~ J99|194|	3-oxoacyl-[acyl-carrier-protein]_synthase_3	H13-1
2	0	0	GI:409893470 ~ GI:443620953 ~ GI:4154821	26695|299| ~ A45|982| ~ J99|298|	Alginate_lyase	H13-1
6	0	0	GI:409893686 ~ GI:4155017	26695|522| ~ J99|486|	Type_IV_secretion_system_protein_VirB11	H13-1
5	2	2	GI:409893678 ~ GI:443621465 ~ GI:4154995	26695|516| ~ A45|1491| ~ J99|479|	L,D-transpeptidase_catalytic_domain	H13-1
11	4	4	GI:409894506 ~ GI:443620185 ~ GI:4155866	26695|1339| ~ A45|236| ~ J99|1271|	Glyceraldehyde-3-phosphate_dehydrogenase_2	H13-1
3	1	0	GI:409893497 ~ GI:443620928 ~ GI:4154860	26695|324| ~ A45|958| ~ J99|323|	Ketol-acid_reductoisomerase	H13-1
12	1	1	GI:409894012 ~ GI:443620148 ~ GI:4155357	26695|856| ~ A45|204| ~ J99|806|	ADP-L-glycero-D-manno-heptose-6-epimerase	H13-1
0	1	1	GI:409894425 ~ GI:443620533 ~ GI:4155796	26695|1259| ~ A45|561| ~ J99|1194|	hypothetical_protein	H13-1
5	0	0	GI:409893208 ~ GI:443621136 ~ GI:4154541	26695|45| ~ A45|1160| ~ J99|43|	Agmatine_deiminase	H13-1
2	0	0	GI:409894427 ~ GI:443620535 ~ GI:4155778	26695|1261| ~ A45|563| ~ J99|1196|	NADH-quinone_oxidoreductase_subunit_8	H13-1
15	0	0	GI:409894652 ~ GI:443620652 ~ GI:4155990	26695|1478| ~ A45|676| ~ J99|1389|	Multidrug_resistance_protein_MdtN	H13-1
5	1	0	GI:409894589 ~ GI:443620058 ~ GI:4155933	26695|1421| ~ A45|124| ~ J99|1334|	Arabinose_5-phosphate_isomerase_KdsD	H13-1
3	0	0	GI:409893446 ~ GI:443620119 ~ GI:4154786	26695|275| ~ A45|175| ~ J99|273|	lipid_A_biosynthesis_lauroyl_acyltransferase ~ Lipid_A_biosynthesis_lauroyl_acyltransferase	H13-1
6	0	0	GI:409893566 ~ GI:443620480 ~ GI:4155565	26695|395| ~ A45|513| ~ J99|987|	Phenylalanine--tRNA_ligase_alpha_subunit	H13-1
1	0	0	GI:443621143 ~ GI:4154544	A45|1167| ~ J99|36|	type_IV_secretion_system_protein_VirB9	H13-1
7	1	1	GI:409894742 ~ GI:443620788 ~ GI:4156118	26695|1563| ~ A45|817| ~ J99|1494|	Methionine_import_ATP-binding_protein_MetN	H13-1
3	0	0	GI:409894412 ~ GI:443620521 ~ GI:4155771	26695|1246| ~ A45|549| ~ J99|1182|	Tryptophan--tRNA_ligase	H13-1
7	2	2	GI:409893386 ~ GI:443620971 ~ GI:4154728	26695|218| ~ A45|997| ~ J99|215|	NifU-like_protein	H13-1
2	0	0	GI:409894007 ~ GI:443620143 ~ GI:4155370	26695|851| ~ A45|199| ~ J99|803|	GMP_reductase	H13-1
14	1	0	GI:409894319 ~ GI:443620308 ~ GI:4155677	26695|1161| ~ A45|351| ~ J99|1099|	Ferredoxin--NADP_reductase	H13-1
2	0	0	GI:409893743 ~ GI:443621423 ~ GI:4155059	26695|579| ~ A45|1450| ~ J99|542|	preprotein_translocase_subunit_SecG ~ transport_protein_TonB	H13-1
3	0	0	GI:409894714 ~ GI:443620761 ~ GI:4156068	26695|1536| ~ A45|790| ~ J99|1460|	preprotein_translocase_subunit_SecF	H13-1
7	1	1	GI:409893325 ~ GI:443621024 ~ GI:4154663	26695|158| ~ A45|1050| ~ J99|156|	Delta-aminolevulinic_acid_dehydratase	H13-1
6	0	0	GI:409893181 ~ GI:443620006 ~ GI:4154519	26695|17| ~ A45|71| ~ J99|17|	Chemotaxis_protein_CheV	H13-1
7	2	2	GI:409893716 ~ GI:443621450 ~ GI:4155041	26695|552| ~ A45|1476| ~ J99|513|	hypothetical_protein	H13-1
1	0	0	GI:409893321 ~ GI:443621029 ~ GI:4154659	26695|154| ~ A45|1054| ~ J99|152|	hypothetical_protein	H13-1
7	0	0	GI:409894504 ~ GI:443620183 ~ GI:4155864	26695|1337| ~ A45|234| ~ J99|1269|	Magnesium_transport_protein_CorA	H13-1
10	0	0	GI:409893898 ~ GI:443621264 ~ GI:4155224	26695|740| ~ A45|1290| ~ J99|694|	Ribose-phosphate_pyrophosphokinase	H13-1
4	0	0	GI:409894660 ~ GI:443620659 ~ GI:4156008	26695|1485| ~ A45|683| ~ J99|1396|	Transaldolase	H13-1
3	0	0	GI:409893839 ~ GI:443621327 ~ GI:4155173	26695|678| ~ A45|1351| ~ J99|634|	UDP-N-acetyl-2-amino-2-deoxy-D-glucuronate_oxidase	H13-1
2	0	0	GI:409894737 ~ GI:443620783 ~ GI:4156099	26695|1558| ~ A45|812| ~ J99|1489|	RlpA-like_protein_precursor	H13-1
8	1	0	GI:409893257 ~ GI:443621088 ~ GI:4154596	26695|93| ~ A45|1112| ~ J99|94|	Putative_2-hydroxyacid_dehydrogenase	H13-1
10	2	2	GI:409894265 ~ GI:443620242 ~ GI:4155627	26695|1108| ~ A45|289| ~ J99|1046|	Pyruvate_synthase_subunit_PorB	H13-1
14	2	2	GI:409893646 ~ GI:443620176 ~ GI:4154972	26695|482| ~ A45|229| ~ J99|449|	Catalase	H13-1
4	1	0	GI:409894210 ~ GI:443620868 ~ GI:4154906	26695|1054| ~ A45|899| ~ J99|380|	Helicobacter_outer_membrane_protein	H13-1
3	0	0	GI:409893778 ~ GI:443621387 ~ GI:4155110	26695|615| ~ A45|1416| ~ J99|572|	Chemotaxis_protein_CheV	H13-1
1	0	0	GI:409894708 ~ GI:443620755 ~ GI:4156077	26695|1530| ~ A45|784| ~ J99|1466|	Glycyl-glycine_endopeptidase_ALE-1_precursor	H13-1
4	0	0	GI:443621526	A45|1547|	Hemin_receptor_precursor	H13-1
3	0	0	GI:409894117 ~ GI:443620420 ~ GI:4155460	26695|957| ~ A45|456| ~ J99|907|	Glycerol-3-phosphate_dehydrogenase_[NAD(P)+]	H13-1
1	0	0	GI:409893495 ~ GI:443620930 ~ GI:4154830	26695|322| ~ A45|960| ~ J99|321|	Tetraacyldisaccharide_4'-kinase	H13-1
7	0	0	GI:409893718 ~ GI:443621447 ~ GI:4155056	26695|555| ~ A45|1474| ~ J99|516|	Acetyl-coenzyme_A_carboxylase_carboxyl_transferase_subunit_alpha	H13-1
10	0	0	GI:409893556 ~ GI:443620470 ~ GI:4155571	26695|385| ~ A45|503| ~ J99|997|	Chemotaxis_protein_CheV	H13-1
17	0	0	GI:409893978 ~ GI:443621184 ~ GI:4155329	26695|822| ~ A45|1206| ~ J99|777|	Thioredoxin_reductase	H13-1
10	0	0	GI:409893204 ~ GI:443621139 ~ GI:4154548	26695|42| ~ A45|1163| ~ J99|40|	GDP-L-fucose_synthase	H13-1
1	0	0	GI:409894081 ~ GI:443620387 ~ GI:4155439	26695|923| ~ A45|423| ~ J99|872|	hypothetical_protein ~ Protease_HtpX	H13-1
9	0	0	GI:409893251 ~ GI:443621094 ~ GI:4154593	26695|87| ~ A45|1118| ~ J99|86|	Malonyl_CoA-acyl_carrier_protein_transacylase	H13-1
1	0	0	GI:409893279 ~ GI:443621066 ~ GI:4154625	26695|114| ~ A45|1091| ~ J99|115|	tRNA-modifying_enzyme	H13-1
1	1	1	GI:409893865 ~ GI:443621301 ~ GI:4155209	26695|705| ~ A45|1325| ~ J99|660|	Ribosomal_RNA_small_subunit_methyltransferase_H	H13-1
1	0	0	GI:409894709 ~ GI:443620756 ~ GI:4156078	26695|1531| ~ A45|785| ~ J99|1465|	Murein_hydrolase_activator_NlpD_precursor	H13-1
13	0	0	GI:409893338 ~ GI:443621011 ~ GI:4154667	26695|171| ~ A45|1038| ~ J99|168|	Fructose-bisphosphate_aldolase	H13-1
2	0	0	GI:409893406 ~ GI:443620089 ~ GI:4154736	26695|236| ~ A45|148| ~ J99|233|	Octaprenyl-diphosphate_synthase	H13-1
4	0	0	GI:409894239 ~ GI:443620898 ~ GI:4154863	26695|1082| ~ A45|927| ~ J99|352|	Aspartate_carbamoyltransferase	H13-1
6	1	0	GI:409893801 ~ GI:4155142	26695|638| ~ J99|595|	Helicobacter_outer_membrane_protein	H13-1
5	0	0	GI:409893323 ~ GI:443621027 ~ GI:4154661	26695|156| ~ A45|1052| ~ J99|154|	Putative_beta-lactamase_HcpD_precursor	H13-1
1	0	0	GI:409893700 ~ GI:4155020	26695|534| ~ J99|497|	hypothetical_protein	H13-1
2	1	0	GI:409893882 ~ GI:443621281 ~ GI:4155218	26695|724| ~ A45|1307| ~ J99|678|	Helicobacter_outer_membrane_protein	H13-1
5	1	1	GI:409893269 ~ GI:443621076 ~ GI:4154606	26695|104| ~ A45|1101| ~ J99|105|	O-acetylserine_dependent_cystathionine_beta-synthase	H13-1
4	0	0	GI:409894296 ~ GI:443620273 ~ GI:4155662	26695|1139| ~ A45|319| ~ J99|1078|	Methionyl-tRNA_formyltransferase	H13-1
2	0	0	GI:409894583 ~ GI:443620052 ~ GI:4155921	26695|1413| ~ A45|116| ~ J99|1326|	Pertussis_toxin_liberation_protein_H	H13-1
8	2	2	GI:409894617 ~ GI:443620616 ~ GI:4155959	26695|1444| ~ A45|642| ~ J99|1355|	hypothetical_protein	H13-1
2	0	0	GI:409894083 ~ GI:443620389 ~ GI:4155442	26695|925| ~ A45|425| ~ J99|876|	Farnesyl_diphosphate_synthase	H13-1
6	0	0	GI:409894116 ~ GI:443620419 ~ GI:4155459	26695|956| ~ A45|455| ~ J99|906|	Glycine--tRNA_ligase_alpha_subunit	H13-1
1	0	0	GI:409893677 ~ GI:443621464 ~ GI:4154994	26695|515| ~ A45|1490| ~ J99|478|	GTP-binding_protein_Era	H13-1
10	2	1	GI:409894288 ~ GI:443620265 ~ GI:4155638	26695|1131| ~ A45|311| ~ J99|1070|	F-ATPase_gamma_subunit	H13-1
7	1	0	GI:409894168 ~ GI:443620827 ~ GI:4154941	26695|1012| ~ A45|858| ~ J99|420|	4-hydroxy-tetrahydrodipicolinate_synthase	H13-1
15	0	0	GI:409893337 ~ GI:443621012 ~ GI:4154677	26695|170| ~ A45|1039| ~ J99|167|	Putative_peptidyl-prolyl_cis-trans_isomerase_Cbf2_precursor	H13-1
7	0	0	GI:409894175 ~ GI:443620834 ~ GI:4154935	26695|1020| ~ A45|865| ~ J99|413|	DNA-binding_transcriptional_regulator_BasR	H13-1
5	1	1	GI:409893738 ~ GI:443621428 ~ GI:4155069	26695|574| ~ A45|1455| ~ J99|537|	Bifunctional_protein_FolD_protein	H13-1
7	0	0	GI:409893918 ~ GI:443621242 ~ GI:4155255	26695|761| ~ A45|1268| ~ J99|714|	Signal_recognition_particle_receptor_FtsY	H13-1
1	1	1	GI:409894207 ~ GI:443620865 ~ GI:4154903	26695|1051| ~ A45|896| ~ J99|383|	UDP-3-O-[3-hydroxymyristoyl]_N-acetylglucosamine_deacetylase	H13-1
3	0	0	GI:409893475 ~ GI:443620948 ~ GI:4154816	26695|304| ~ A45|977| ~ J99|303|	(R)-stereoselective_amidase	H13-1
6	0	0	GI:409894189 ~ GI:443620847 ~ GI:4154927	26695|1033| ~ A45|878| ~ J99|400|	Flagellum_site-determining_protein_YlxH	H13-1
3	0	0	GI:409894596 ~ GI:443619943 ~ GI:4155950	26695|1426| ~ A45|12| ~ J99|1337|	Formyltetrahydrofolate_deformylase	H13-1
1	0	0	GI:409893744 ~ GI:4155060	26695|580| ~ J99|543|	hypothetical_protein	H13-1
8	1	1	GI:409893912 ~ GI:443621249 ~ GI:4155248	26695|755| ~ A45|1274| ~ J99|709|	N-carbamoyl-D-amino_acid_hydrolase	H13-1
10	0	0	GI:409893476 ~ GI:443620947 ~ GI:4154817	26695|305| ~ A45|976| ~ J99|304|	putative_polysaccharide_deacetylase_PdaA_precursor	H13-1
1	0	0	GI:409893987 ~ GI:443621176 ~ GI:4155337	26695|830| ~ A45|1198| ~ J99|785|	hypothetical_protein	H13-1
4	0	0	GI:409894597 ~ GI:443619942 ~ GI:4155951	26695|1427| ~ A45|11| ~ J99|1338|	Putative_signal_peptide_peptidase_SppA	H13-1
3	0	0	GI:409893309 ~ GI:443621040 ~ GI:4154645	26695|142| ~ A45|1066| ~ J99|140|	Cytochrome_c_oxidase_subunit_III	H13-1
3	0	0	GI:409894252 ~ GI:443620228 ~ GI:4155604	26695|1095| ~ A45|276| ~ J99|1032|	Putative_beta-lactamase_HcpC_precursor	H13-1
1	0	0	GI:443620932	A45|962|	pseudaminic_acid_biosynthesis-associated_protein_PseG	H13-1
4	0	0	GI:409893458 ~ GI:443620107 ~ GI:4154812	26695|287| ~ A45|163| ~ J99|285|	hypothetical_protein	H13-1
7	0	0	GI:409893737 ~ GI:443621429 ~ GI:4155068	26695|573| ~ A45|1456| ~ J99|536|	Signal_peptidase_I	H13-1
6	0	0	GI:409894293 ~ GI:443620270 ~ GI:4155659	26695|1136| ~ A45|316| ~ J99|1075|	putative_chromosome-partitioning_protein_ParB	H13-1
10	0	0	GI:409894547 ~ GI:443620746 ~ GI:4156058	26695|1377| ~ A45|775| ~ J99|1449|	Fructose-1,6-bisphosphatase_class_1	H13-1
3	0	0	GI:409894106 ~ GI:443620409 ~ GI:4155465	26695|946| ~ A45|445| ~ J99|896|	Acetyl-coenzyme_A_carboxylase_carboxyl_transferase_subunit_beta	H13-1
6	1	0	GI:409894179 ~ GI:443620837 ~ GI:4154938	26695|1023| ~ A45|868| ~ J99|410|	Curved_DNA-binding_protein	H13-1
6	0	0	GI:409894185 ~ GI:443620843 ~ GI:4154923	26695|1029| ~ A45|874| ~ J99|404|	Flagellar_motor_switch_protein_FliN	H13-1
7	1	1	GI:409893467 ~ GI:443620956 ~ GI:4154800	26695|296| ~ A45|985| ~ J99|295|	Stage_0_sporulation_protein_KD	H13-1
9	0	0	GI:409893289 ~ GI:443621058 ~ GI:4154636	26695|123| ~ A45|1084| ~ J99|122|	Helicobacter_outer_membrane_protein	H13-1
9	2	2	GI:409893291 ~ GI:443621056 ~ GI:4154638	26695|125| ~ A45|1082| ~ J99|124|	hypothetical_protein	H13-1
3	1	0	GI:409894703 ~ GI:443620750 ~ GI:4156092	26695|1525| ~ A45|779| ~ J99|1471|	putative_bifunctional_cbb3-type_cytochrome_c_oxidase_subunit_II/cytochrome_c	H13-1
2	1	0	GI:409894501 ~ GI:443620613 ~ GI:4155861	26695|1334| ~ A45|641| ~ J99|1266|	transport_protein_TonB	H13-1
2	0	0	GI:409894043 ~ GI:443621503 ~ GI:4155385	26695|885| ~ A45|1526| ~ J99|836|	Ribitol_2-dehydrogenase ~ Putative_oxidoreductase_SadH	H13-1
3	0	0	GI:409893679 ~ GI:443621456 ~ GI:4155011	26695|517| ~ A45|1482| ~ J99|480|	Beta-lactamase_HcpB ~ Beta-lactamase_HcpA_precursor	H13-1
5	0	0	GI:409894569 ~ GI:443620222 ~ GI:4155907	26695|1398| ~ A45|272| ~ J99|1306|	Biotin_synthase	H13-1
1	0	0	GI:409893638 ~ GI:4154968	26695|473| ~ J99|442|	lipopolysaccharide_heptosyltransferase_I ~ hypothetical_protein	H13-1
4	0	0	GI:409893653 ~ GI:443621487 ~ GI:4154991	26695|489| ~ A45|1512| ~ J99|456|	Neuraminyllactose-binding_hemagglutinin_precursor_(NLBH)	H13-1
2	0	0	GI:409894578 ~ GI:443620046 ~ GI:4155928	26695|1406| ~ A45|107| ~ J99|1319|	tRNA_dimethylallyltransferase	H13-1
7	0	0	NA ~ GI:4155030	26695|529| ~ J99|493|	CAG_pathogenicity_island_protein_12_precursor	H13-1
1	0	0	GI:409893956 ~ GI:443621207 ~ GI:4155309	26695|799| ~ A45|1228| ~ J99|752|	hypothetical_protein	H13-1
1	0	0	GI:409894267 ~ GI:443620244 ~ GI:4155630	26695|1110| ~ A45|291| ~ J99|1048|	Helicobacter_outer_membrane_protein	H13-1
13	1	1	GI:409894328 ~ GI:443620300 ~ GI:4155688	26695|1169| ~ A45|343| ~ J99|1107|	ABC_transporter_glutamine-binding_protein_GlnH_precursor	H13-1
12	2	1	GI:409893166 ~ GI:443620803 ~ GI:4154506	26695|3| ~ A45|835| ~ J99|3|	2-dehydro-3-deoxyphosphooctonate_aldolase	H13-1
2	0	0	GI:409893169 ~ GI:443620806 ~ GI:4154509	26695|6| ~ A45|838| ~ J99|6|	Pantothenate_synthetase	H13-1
10	0	0	NA	A45|940|	hypothetical_protein	H13-1
12	0	0	GI:409894476 ~ GI:443620588 ~ GI:4155813	26695|1309| ~ A45|615| ~ J99|1243|	hypothetical_protein	H13-1
12	0	0	GI:409893357 ~ GI:443620998 ~ GI:4154700	26695|190| ~ A45|1024| ~ J99|187|	Enoyl-[acyl-carrier-protein]_reductase_[NADH]_FabI	H13-1
6	1	1	GI:409893176 ~ GI:443620001 ~ GI:4154514	26695|12| ~ A45|66| ~ J99|12|	hypothetical_protein	H13-1
1	0	0	GI:409894542 ~ GI:443620218 ~ GI:4155901	26695|1373| ~ A45|268| ~ J99|1302|	Arogenate_dehydrogenase	H13-1
2	0	0	GI:409893563 ~ GI:443620477 ~ GI:4155562	26695|392| ~ A45|510| ~ J99|990|	4-hydroxy-3-methylbut-2-enyl_diphosphate_reductase	H13-1
7	0	0	GI:409894139 ~ GI:443620439 ~ GI:4155504	26695|980| ~ A45|477| ~ J99|927|	Small-conductance_mechanosensitive_channel	H13-1
1	0	0	GI:409894149 ~ GI:443620728	26695|990| ~ A45|757|	hypothetical_protein	H13-1
15	1	1	GI:409893752 ~ GI:443621413 ~ GI:4155085	26695|588| ~ A45|1441| ~ J99|551|	2-oxoglutarate_oxidoreductase_subunit_KorB	H13-1
2	0	0	GI:409894516 ~ GI:443620196 ~ GI:4155874	26695|1348| ~ A45|246| ~ J99|1280|	putative_nicotinate-nucleotide_pyrophosphorylase_[carboxylating]	H13-1
2	0	0	GI:409893979 ~ GI:443621183 ~ GI:4155330	26695|823| ~ A45|1205| ~ J99|778|	Lipooligosaccharide_biosynthesis_protein_lex-1 ~ Glycosyltransferase_family_25_(LPS_biosynthesis_protein)	H13-1
9	0	0	GI:409893809 ~ GI:443621355 ~ GI:4155134	26695|646| ~ A45|1381| ~ J99|604|	UTP--glucose-1-phosphate_uridylyltransferase	H13-1
12	1	1	GI:409893864 ~ GI:443621302 ~ GI:4155198	26695|704| ~ A45|1326| ~ J99|659|	Helicobacter_outer_membrane_protein	H13-1
2	0	0	GI:409893727 ~ GI:443621439 ~ GI:4155052	26695|563| ~ A45|1466| ~ J99|524|	Diaminopimelate_epimerase	H13-1
2	0	0	GI:443620260 ~ GI:4155647	A45|306| ~ J99|1065|	hypothetical_protein	H13-1
14	1	0	GI:409894730 ~ GI:443620776 ~ GI:4156104	26695|1551| ~ A45|805| ~ J99|1482|	D-methionine-binding_lipoprotein_MetQ_precursor	H13-1
1	0	0	GI:409894627 ~ GI:443620626 ~ GI:4155969	26695|1454| ~ A45|652| ~ J99|1365|	virulence_factor_Mce_family_protein	H13-1
5	0	0	GI:409894591 ~ GI:443620060 ~ GI:4155935	26695|1423| ~ A45|126| ~ J99|1332|	Ribosomal_RNA_small_subunit_methyltransferase_A	H13-1
1	0	0	GI:409893314 ~ NA ~ GI:4154664	26695|147| ~ A45|1061| ~ J99|145|	hypothetical_protein	H13-1
8	2	2	GI:409894536 ~ GI:443620212 ~ GI:4155893	26695|1368| ~ A45|262| ~ J99|1296|	Acyl-[acyl-carrier-protein]--UDP-N-_acetylglucosamine_O-acyltransferase	H13-1
7	0	0	GI:409893833 ~ GI:443621333 ~ GI:4155167	26695|671| ~ A45|1357| ~ J99|628|	Helicobacter_outer_membrane_protein	H13-1
6	0	0	GI:443621319 ~ GI:4155184	A45|1343| ~ J99|642|	DNA_polymerase_II ~ putative_3'-5'_exonuclease_related_to_the_exonuclease_domain_of_PolB	H13-1
3	0	0	GI:409894213 ~ GI:443620871 ~ GI:4154887	26695|1057| ~ A45|902| ~ J99|377|	3-methyl-2-oxobutanoate_hydroxymethyltransferase	H13-1
11	0	0	GI:409893498 ~ GI:443620927 ~ GI:4154852	26695|325| ~ A45|957| ~ J99|324|	Cell_division_inhibitor_MinD	H13-1
4	0	0	GI:409893468 ~ GI:443620955 ~ GI:4154801	26695|297| ~ A45|984| ~ J99|296|	Stage_0_sporulation_protein_KE	H13-1
4	0	0	GI:409894614 ~ GI:443620701 ~ GI:4155956	26695|1441| ~ A45|730| ~ J99|1352|	hypothetical_protein	H13-1
1	2	2	GI:409893705 ~ GI:4155025	26695|539| ~ J99|502|	hypothetical_protein	H13-1
4	1	1	GI:409893347 ~ GI:443620991 ~ GI:4154688	26695|180| ~ A45|1017| ~ J99|179|	hypothetical_protein ~ cell_division_protein_ZipA	H13-1
2	0	0	GI:409893904 ~ GI:4155240	26695|747| ~ J99|701|	cell_division_ABC_transporter_subunit_FtsX	H13-1
0	1	1	GI:409894518 ~ GI:443620198 ~ GI:4155876	26695|1350| ~ A45|248| ~ J99|1282|	Phosphatidylserine_decarboxylase_proenzyme	H13-1
8	1	1	GI:409894084 ~ GI:443620390 ~ GI:4155443	26695|926| ~ A45|426| ~ J99|877|	5'-nucleotidase_SurE	H13-1
1	0	0	GI:4155512	J99|946|	hypothetical_protein	H13-1
8	1	1	GI:409894114 ~ GI:443620417 ~ GI:4155457	26695|954| ~ A45|453| ~ J99|904|	Putative_zinc_ribbon_domain_protein	H13-1
1	0	0	GI:409893500 ~ GI:443620925 ~ GI:4154854	26695|327| ~ A45|955| ~ J99|326|	DNA_protecting_protein_DprA	H13-1
15	1	1	GI:409893396 ~ GI:443620099 ~ GI:4154742	26695|227| ~ A45|158| ~ J99|224|	disulfide_isomerase/thiol-disulfide_oxidase	H13-1
5	0	0	GI:409893227 ~ GI:443621118 ~ GI:4154570	26695|65| ~ A45|1141| ~ J99|65|	Urease_accessory_protein_UreH	H13-1
2	0	0	GI:409894422 ~ GI:443620530 ~ GI:4155793	26695|1256| ~ A45|558| ~ J99|1191|	NAD(P)H-quinone_oxidoreductase_subunit_J	H13-1
17	0	0	GI:409894719 ~ GI:443620766 ~ GI:4156073	26695|1541| ~ A45|795| ~ J99|1455|	Vegetative_protein_209	H13-1
8	0	0	GI:409894294 ~ GI:443620271 ~ GI:4155660	26695|1137| ~ A45|317| ~ J99|1076|	Sporulation_initiation_inhibitor_protein_soj	H13-1
4	0	0	NA	A45|938|	hypothetical_protein	H13-1
2	0	0	GI:409894437 ~ GI:443620546 ~ GI:4155802	26695|1271| ~ A45|576| ~ J99|1206|	Tryptophan_synthase_alpha_chain	H13-1
3	0	0	GI:409893986 ~ GI:443621177 ~ GI:4155336	26695|829| ~ A45|1199| ~ J99|784|	Spermidine_synthase	H13-1
10	0	0	GI:409894169 ~ GI:443620828 ~ GI:4154942	26695|1013| ~ A45|859| ~ J99|419|	Enoyl-[acyl-carrier-protein]_reductase_[NADPH]_FabL	H13-1
11	1	1	GI:409894748 ~ GI:443620793 ~ GI:4156112	26695|1569| ~ A45|824| ~ J99|1499|	Pyridoxine_5'-phosphate_synthase	H13-1
2	0	0	GI:409894628 ~ GI:443620627 ~ GI:4155970	26695|1455| ~ A45|653| ~ J99|1366|	Methionine_import_ATP-binding_protein_MetN_2	H13-1
2	0	0	GI:409893584 ~ GI:443620494 ~ GI:4155549	26695|411| ~ A45|525| ~ J99|974|	tRNA_(mo5U34)-methyltransferase	H13-1
1	0	0	GI:443620983	A45|1009|	Glycosyl_transferase_family_8	H13-1
1	1	1	GI:409893263 ~ GI:443621082 ~ GI:4154602	26695|99| ~ A45|1106| ~ J99|100|	PGL/p-HBAD_biosynthesis_glycosyltransferase/MT3031	H13-1
11	1	1	GI:409893950 ~ GI:443621213 ~ GI:4155289	26695|793| ~ A45|1234| ~ J99|746|	Neuraminyllactose-binding_hemagglutinin_precursor_(NLBH)	H13-1
0	1	0	GI:409894580 ~ GI:443620049 ~ GI:4155918	26695|1410| ~ A45|113| ~ J99|1323|	UDP-N-acetylenolpyruvoylglucosamine_reductase	H13-1
3	0	0	NA	26695|693|	hypothetical_protein	H13-1
6	0	0	GI:409894622 ~ GI:443620621 ~ GI:4155973	26695|1449| ~ A45|647| ~ J99|1360|	Ribosomal_large_subunit_pseudouridine_synthase_B	H13-1
1	0	0	GI:409893969 ~ GI:443621194 ~ GI:4155316	26695|813| ~ A45|1215| ~ J99|765|	Chemotaxis_protein_MotB	H13-1
13	0	0	GI:409894095 ~ GI:443620400 ~ GI:4155451	26695|936| ~ A45|436| ~ J99|887|	putative_amino-acid_ABC_transporter-binding_protein_precursor	H13-1
7	0	0	GI:409894313 ~ GI:443620314 ~ GI:4155682	26695|1155| ~ A45|357| ~ J99|1093|	Pyrroline-5-carboxylate_reductase	H13-1
6	0	0	GI:409893968 ~ GI:443621195 ~ GI:4155315	26695|812| ~ A45|1216| ~ J99|764|	Chemotaxis_protein_PomA	H13-1
19	0	0	GI:409894755 ~ GI:409894756 ~ GI:443620799 ~ GI:443620800 ~ GI:4156123	26695|1575| ~ 26695|1576| ~ A45|831| ~ A45|832| ~ J99|1504|	Ubiquinol-cytochrome_C_chaperone	H13-1
2	0	0	GI:409894271 ~ GI:443620249 ~ GI:4155634	26695|1114| ~ A45|295| ~ J99|1053|	Putative_beta-lactamase_HcpC_precursor	H13-1
4	0	0	GI:409894041 ~ GI:443621501 ~ GI:4155391	26695|883| ~ A45|1524| ~ J99|834|	putative_ABC_transporter_ATP-binding_protein	H13-1
1	0	0	GI:4155479	J99|910|	hypothetical_protein	H13-1
1	0	0	GI:409893334 ~ GI:443621015 ~ GI:4154675	26695|168| ~ A45|1041| ~ J99|165|	Flagellar_biosynthetic_protein_FliR	H13-1
3	0	0	GI:409893355 ~ GI:443620996 ~ GI:4154698	26695|188| ~ A45|1022| ~ J99|185|	Fumarate_reductase_cytochrome_b_subunit	H13-1
2	1	1	GI:409893625 ~ GI:443620819 ~ GI:4154954	26695|460| ~ A45|850| ~ J99|429|	Tellurite_resistance_protein_TerB	H13-1
2	0	0	GI:409893967 ~ GI:443621196 ~ GI:4155314	26695|811| ~ A45|1217| ~ J99|763|	putative_adenylyltransferase/sulfurtransferase_MoeZ	H13-1
6	0	0	GI:409893300 ~ GI:443621048 ~ GI:4154634	26695|133| ~ A45|1074| ~ J99|132|	Lactate_utilization_protein_A	H13-1
1	0	0	GI:409894739 ~ GI:443620785 ~ GI:4156101	26695|1560| ~ A45|814| ~ J99|1491|	putative_deoxyribonuclease_YcfH	H13-1
7	0	0	GI:409893669 ~ GI:443621471 ~ GI:4155000	26695|507| ~ A45|1499| ~ J99|472|	4-hydroxy-tetrahydrodipicolinate_reductase	H13-1
1	0	0	GI:409893326	26695|159|	Sensor_protein_PfeS	H13-1
5	0	0	GI:409894459 ~ GI:443620571 ~ GI:4155829	26695|1293| ~ A45|599| ~ J99|1227|	Methionine_aminopeptidase_1	H13-1
1	0	0	GI:409894340 ~ GI:443620287 ~ GI:4155705	26695|1178| ~ A45|332| ~ J99|1116|	tRNA_2-thiocytidine_biosynthesis_protein_TtcA	H13-1
3	1	0	GI:409893331 ~ GI:443621018 ~ GI:4154672	26695|165| ~ A45|1044| ~ J99|162|	hypothetical_protein	H13-1
1	0	0	GI:443621161	A45|1184|	putative_type_I_restriction_enzymeP_M_protein	H13-1
8	0	0	GI:409893692 ~ GI:4155010	26695|527| ~ J99|491|	VirB8_protein	H13-1
1	0	0	GI:409893557 ~ GI:443620471 ~ GI:4155572	26695|386| ~ A45|504| ~ J99|996|	UDP-2,3-diacylglucosamine_hydrolase	H13-1
13	2	1	GI:409893485 ~ GI:443620941 ~ GI:4154832	26695|312| ~ A45|971| ~ J99|310|	heme_oxygenase,_HugZ_family	H13-1
3	0	0	GI:409894187 ~ GI:443620845 ~ GI:4154925	26695|1031| ~ A45|876| ~ J99|402|	Sigma-F_factor	H13-1
3	0	0	GI:409893521 ~ GI:4155614	26695|350| ~ J99|1031|	NADP-dependent_3-hydroxy_acid_dehydrogenase_YdfG	H13-1
1	0	0	GI:409893375 ~ GI:443620980 ~ GI:4154718	26695|208| ~ A45|1006| ~ J99|204|	Beta-lactamase_HcpA_precursor	H13-1
7	0	0	GI:409894690 ~ GI:443620688 ~ GI:4156036	26695|1515| ~ A45|718| ~ J99|1423|	Exodeoxyribonuclease	H13-1
2	1	1	GI:409893229 ~ GI:443621116 ~ GI:4154572	26695|67| ~ A45|1139| ~ J99|67|	Urease_accessory_protein_UreF	H13-1
6	3	3	GI:409893576 ~ GI:443620488 ~ GI:4155554	26695|403| ~ A45|520| ~ J99|979|	Neuraminyllactose-binding_hemagglutinin_precursor_(NLBH)	H13-1
4	0	0	GI:409894070	26695|913|	Brucella_heme_uptake_protein_A	H13-1
3	1	0	GI:409894327 ~ GI:443620301 ~ GI:4155696	26695|1168| ~ A45|344| ~ J99|1106|	Arginine_transport_ATP-binding_protein_ArtM	H13-1
12	0	0	GI:409894632 ~ GI:443620632 ~ GI:4155980	26695|1459| ~ A45|657| ~ J99|1370|	Helicobacter_outer_membrane_protein	H13-1
9	0	0	GI:409894345 ~ GI:443620283 ~ GI:4155711	26695|1182| ~ A45|328| ~ J99|1120|	Carbonic_anhydrase_precursor	H13-1
1	0	0	NA	26695|37|	type_IV_secretion_system_protein_VirB9	H13-1
9	1	1	GI:409893722 ~ GI:443621444 ~ GI:4155047	26695|558| ~ A45|1471| ~ J99|519|	3-oxoacyl-[acyl-carrier-protein]_reductase_FabG	H13-1
3	1	1	GI:409894647 ~ GI:443620647 ~ GI:4155985	26695|1473| ~ A45|671| ~ J99|1384|	Demethylmenaquinone_methyltransferase	H13-1
10	1	1	GI:409893353 ~ GI:443620994 ~ GI:4154696	26695|186| ~ A45|1020| ~ J99|183|	Fumarate_reductase_iron-sulfur_subunit	H13-1
5	1	1	GI:409893491 ~ GI:443620935 ~ GI:4154827	26695|318| ~ A45|965| ~ J99|316|	Helicobacter_outer_membrane_protein	H13-1
4	0	0	GI:409893395 ~ GI:443620100 ~ GI:4154741	26695|226| ~ A45|159| ~ J99|223|	3-deoxy-manno-octulosonate_cytidylyltransferase	H13-1
1	0	0	GI:409894115 ~ GI:443620418 ~ GI:4155458	26695|955| ~ A45|454| ~ J99|905|	metal-binding_protein	H13-1
5	0	0	GI:409894032 ~ GI:443620168 ~ GI:4155375	26695|876| ~ A45|224| ~ J99|825|	hypothetical_protein ~ NYN_domain_protein	H13-1
6	1	1	GI:409894559 ~ GI:443620738 ~ GI:4156054	26695|1388| ~ A45|767| ~ J99|1441|	Helicobacter_outer_membrane_protein	H13-1
10	0	0	GI:409894053 ~ GI:443621511 ~ GI:4155406	26695|894| ~ A45|1532| ~ J99|848|	Hydrogenase/urease_nickel_incorporation_protein_HypB	H13-1
1	0	0	GI:409893894 ~ GI:443621267 ~ GI:4155221	26695|737| ~ A45|1293| ~ J99|691|	acetoin_dehydrogenase_E2_subunit_dihydrolipoyllysine-residue_acetyltransferase	H13-1
2	0	0	GI:409893871 ~ GI:443621292 ~ GI:4155205	26695|713| ~ A45|1317| ~ J99|667|	Lipopolysaccharide_export_system_ATP-binding_protein_LptB	H13-1
1	0	0	GI:409893826 ~ GI:443621340 ~ GI:4155159	26695|662| ~ A45|1366| ~ J99|620|	Ribonuclease_3	H13-1
7	1	0	GI:409893324 ~ GI:443621025 ~ GI:4154662	26695|157| ~ A45|1051| ~ J99|155|	putative_transcriptional_regulatory_protein	H13-1
8	0	0	GI:409893931 ~ GI:443621231 ~ GI:4155270	26695|774| ~ A45|1252| ~ J99|728|	Uridylate_kinase	H13-1
3	0	0	GI:409894212 ~ GI:443620870 ~ GI:4154908	26695|1056| ~ A45|901| ~ J99|378|	hypothetical_protein	H13-1
19	0	0	GI:409893234 ~ GI:443621111 ~ GI:4154577	26695|71| ~ A45|1135| ~ J99|71|	Urease_subunit_alpha	H13-1
1	0	0	GI:409893701 ~ GI:4155021	26695|535| ~ J99|498|	hypothetical_protein	H13-1
7	2	2	GI:409893258 ~ GI:443621087 ~ GI:4154597	26695|94| ~ A45|1111| ~ J99|95|	hypothetical_protein	H13-1
2	0	0	GI:409893343 ~ GI:443620987 ~ GI:4154684	26695|176| ~ A45|1013| ~ J99|175|	Colicin_V_production_protein	H13-1
1	0	0	GI:409894373 ~ GI:443620351 ~ GI:4155726	26695|1209| ~ A45|391| ~ J99|1145|	hypothetical_protein	H13-1
1	0	0	GI:409893910 ~ GI:443621251 ~ GI:4155246	26695|753| ~ A45|1276| ~ J99|707|	putative_adenylyltransferase/sulfurtransferase_MoeZ	H13-1
10	0	0	GI:409894473 ~ GI:443620585 ~ GI:4155825	26695|1306| ~ A45|612| ~ J99|1240|	hypothetical_protein	H13-1
6	1	1	GI:409893356 ~ GI:443620997 ~ GI:4154699	26695|189| ~ A45|1023| ~ J99|186|	Triosephosphate_isomerase	H13-1
10	0	0	GI:409894360 ~ GI:443620337 ~ GI:4155721	26695|1196| ~ A45|377| ~ J99|1132|	50S_ribosomal_protein_L1	H13-1
4	0	0	GI:409894419 ~ GI:443620527 ~ GI:4155790	26695|1253| ~ A45|555| ~ J99|1188|	NAD-dependent_protein_deacylase	H13-1
1	0	0	GI:409894335 ~ GI:443620291 ~ GI:4155701	26695|1174| ~ A45|336| ~ J99|1112|	Purine_nucleoside_phosphorylase_DeoD-type	H13-1
10	0	0	GI:409893851 ~ GI:443621317 ~ GI:4155186	26695|690| ~ A45|1341| ~ J99|651|	Succinyl-CoA:3-ketoacid_coenzyme_A_transferase_subunit_A	H13-1
8	0	0	GI:409893307 ~ GI:443621042 ~ GI:4154643	26695|140| ~ A45|1068| ~ J99|138|	cbb3-type_cytochrome_c_oxidase_subunit_II	H13-1
7	0	0	GI:409893250 ~ GI:443621095 ~ GI:4154592	26695|86| ~ A45|1119| ~ J99|85|	MTA/SAH_nucleosidase	H13-1
9	2	2	GI:409894445 ~ GI:443620555 ~ GI:4155809	26695|1279| ~ A45|585| ~ J99|1213|	Outer_membrane_protein_P4	H13-1
2	0	0	GI:409894303 ~ GI:443620324 ~ GI:4155669	26695|1145| ~ A45|367| ~ J99|1083|	tRNA_(guanine-N(1)-)-methyltransferase	H13-1
3	0	0	GI:409894377 ~ GI:443620359 ~ GI:4155748	26695|1214| ~ A45|397| ~ J99|1149|	ABC_transporter_ATP-binding_protein_YtrB	H13-1
1	0	0	NA	J99|1451|	Type-2_restriction_enzyme_MboII	H13-1
3	0	0	GI:409893802 ~ GI:443621363 ~ GI:4155143	26695|639| ~ A45|1391| ~ J99|596|	7-cyano-7-deazaguanine_synthase	H13-1
1	0	0	GI:409893932 ~ GI:443621230 ~ GI:4155271	26695|775| ~ A45|1251| ~ J99|729|	hypothetical_protein	H13-1
2	0	0	GI:4156018 ~ GI:4155531	J99|1415| ~ J99|961|	hypothetical_protein	H13-1
12	2	1	GI:409893168 ~ GI:443620805 ~ GI:4154508	26695|5| ~ A45|837| ~ J99|5|	Orotidine_5'-phosphate_decarboxylase	H13-1
7	0	0	GI:409894256 ~ GI:443620232 ~ GI:4155608	26695|1099| ~ A45|280| ~ J99|1036|	6-phosphogluconolactonase	H13-1
7	0	0	GI:409894626 ~ GI:443620625 ~ GI:4155968	26695|1453| ~ A45|651| ~ J99|1364|	hypothetical_protein	H13-1
5	0	0	GI:409893327 ~ GI:443621022 ~ GI:4154653	26695|161| ~ A45|1048| ~ J99|158|	Response_regulator_ArlR	H13-1
12	2	2	GI:409893770 ~ GI:443621396 ~ GI:4155091	26695|605| ~ A45|1425| ~ J99|566|	Cation_efflux_system_protein_CzcB	H13-1
1	0	0	GI:409893903 ~ GI:443621257 ~ GI:4155239	26695|746| ~ A45|1284| ~ J99|700|	Lipoprotein-releasing_system_ATP-binding_protein_LolD ~ Bacitracin_export_ATP-binding_protein_BceA	H13-1
1	0	0	GI:443621421	A45|1449|	hypothetical_protein	H13-1
10	0	0	GI:409894198 ~ GI:443620856 ~ GI:4154918	26695|1042| ~ A45|887| ~ J99|391|	Transcriptional_regulatory_protein_CusR	H13-1
2	2	1	GI:409894261 ~ GI:443620237 ~ GI:4155623	26695|1104| ~ A45|285| ~ J99|1042|	Helicobacter_outer_membrane_protein	H13-1
2	2	2	GI:409893540 ~ GI:443620453 ~ GI:4155588	26695|369| ~ A45|487| ~ J99|1013|	Thioredoxin-related_protein	H13-1
2	0	0	GI:409894367 ~ GI:443620344 ~ GI:4155733	26695|1203| ~ A45|384| ~ J99|1139|	phosphoglycolate_phosphatase	H13-1
3	0	0	GI:409894155 ~ GI:443620719 ~ GI:443620015 ~ GI:4155515	26695|996| ~ A45|747| ~ A45|77| ~ J99|948|	ParA-like_protein	H13-1
3	0	0	GI:409893167 ~ GI:443620804 ~ GI:4154507	26695|4| ~ A45|836| ~ J99|4|	Carbonic_anhydrase_1	H13-1
3	1	0	GI:409894674 ~ GI:443620674 ~ GI:4156023	26695|1498| ~ A45|700| ~ J99|1409|	G3P_acyltransferase	H13-1
1	0	0	GI:409894540 ~ GI:443620216 ~ GI:4155904	26695|1371| ~ A45|266| ~ J99|1300|	outer_membrane_assembly_lipoprotein_YfiO	H13-1
4	0	0	GI:409894428 ~ GI:443620536 ~ GI:4155779	26695|1262| ~ A45|564| ~ J99|1197|	NADH-quinone_oxidoreductase_subunit_I	H13-1
4	0	0	GI:443620391 ~ GI:4155433	A45|427| ~ J99|878|	hypothetical_protein	H13-1
1	0	0	GI:409893996 ~ GI:443621166 ~ GI:4155348	26695|840| ~ A45|1189| ~ J99|794|	Thiamine-phosphate_synthase	H13-1
2	1	1	GI:409894017 ~ GI:443620153 ~ GI:4155362	26695|861| ~ A45|209| ~ J99|811|	hypothetical_protein	H13-1
1	0	0	GI:409893766 ~ GI:443621400 ~ GI:4155087	26695|601| ~ A45|1429| ~ J99|562|	3-methyladenine_DNA_glycosylase	H13-1
1	0	0	GI:409894641 ~ GI:443620641 ~ GI:4155997	26695|1467| ~ A45|665| ~ J99|1378|	flagellar_basal_body_P-ring_biosynthesis_protein_FlgA	H13-1
1	0	0	GI:409893693 ~ GI:4155029	26695|528| ~ J99|492|	hypothetical_protein	H13-1
2	0	0	GI:409894548 ~ GI:443620745 ~ GI:4156059	26695|1378| ~ A45|774| ~ J99|1448|	Ribulose-phosphate_3-epimerase	H13-1
3	0	0	GI:409894447 ~ GI:443620557 ~ GI:4155800	26695|1281| ~ A45|587| ~ J99|1215|	Thiaminase-2	H13-1
1	0	0	GI:409893436 ~ GI:443620129 ~ GI:4154776	26695|265| ~ A45|185| ~ J99|263|	hypothetical_protein	H13-1
5	0	0	GI:409893726 ~ GI:443621440 ~ GI:4155051	26695|562| ~ A45|1467| ~ J99|523|	Inner_membrane_protein_YkgB	H13-1
3	0	0	GI:409893397 ~ GI:443620098 ~ GI:4154743	26695|228| ~ A45|157| ~ J99|225|	hypothetical_protein	H13-1
2	1	1	GI:409894743 ~ GI:443620789 ~ GI:4156119	26695|1564| ~ A45|818| ~ J99|1495|	D-methionine_transport_system_permease_protein_MetI	H13-1
8	0	0	GI:409894478 ~ GI:443620590 ~ GI:4155815	26695|1311| ~ A45|617| ~ J99|1245|	50S_ribosomal_protein_L4	H13-1
1	0	0	GI:409893341 ~ GI:443620985 ~ GI:4154682	26695|174| ~ A45|1011| ~ J99|173|	Lipoprotein-releasing_system_ATP-binding_protein_LolD	H13-1
20	0	0	GI:409893552 ~ GI:443620466 ~ GI:4155578	26695|381| ~ A45|499| ~ J99|1001|	Superoxide_dismutase_[Fe]	H13-1
3	0	0	GI:409893666 ~ GI:443621474 ~ GI:4154997	26695|504| ~ A45|1502| ~ J99|469|	GDP-mannose_pyrophosphatase_NudK	H13-1
2	0	0	GI:409893274 ~ GI:443621071 ~ GI:4154611	26695|109| ~ A45|1096| ~ J99|110|	L-fuculose_phosphate_aldolase	H13-1
4	2	2	GI:409893759 ~ GI:4155094	26695|594| ~ J99|556|	tumor_necrosis_factor_alpha-inducing_protein	H13-1
5	0	0	GI:443620963	A45|992|	Aliphatic_amidase	H13-1
7	0	0	GI:409893298 ~ GI:443621050 ~ GI:4154632	26695|131| ~ A45|1076| ~ J99|130|	Lactate_utilization_protein_C	H13-1
1	0	0	GI:409894689 ~ GI:4156035	26695|1514| ~ J99|1422|	Helicobacter_outer_membrane_protein	H13-1
6	0	0	GI:409894620 ~ GI:443620619 ~ GI:4155962	26695|1447| ~ A45|645| ~ J99|1358|	putative_lipoprotein	H13-1
1	0	0	GI:409894110 ~ GI:443620413 ~ GI:4155469	26695|950| ~ A45|449| ~ J99|900|	Oxygen-insensitive_NADPH_nitroreductase	H13-1
2	1	0	GI:409893526 ~ GI:443619973 ~ GI:4155612	26695|355| ~ A45|37| ~ J99|1026|	Protein-L-isoaspartate_O-methyltransferase	H13-1
3	0	0	GI:409894733 ~ GI:443620779 ~ GI:4156107	26695|1554| ~ A45|808| ~ J99|1485|	putative_GTP-binding_protein_EngB	H13-1
3	0	0	GI:409894697 ~ GI:443620694 ~ GI:4156042	26695|1521| ~ A45|724| ~ J99|1429|	Thymidylate_synthase_ThyX	H13-1
6	1	1	GI:409894253 ~ GI:443620229 ~ GI:4155605	26695|1096| ~ A45|277| ~ J99|1033|	KHG/KDPG_aldolase	H13-1
15	0	0	GI:409894454 ~ GI:443620566 ~ GI:4155842	26695|1288| ~ A45|595| ~ J99|1222|	30S_ribosomal_protein_S4	H13-1
3	1	1	GI:409893383 ~ GI:443620974 ~ GI:4154716	26695|215| ~ A45|1000| ~ J99|212|	putative_kinase_inhibitor_protein	H13-1
2	1	1	GI:409893707 ~ GI:4155027	26695|541| ~ J99|504|	hypothetical_protein	H13-1
9	0	0	GI:409893852 ~ GI:443621316 ~ GI:4155187	26695|691| ~ A45|1340| ~ J99|650|	Succinyl-CoA:3-ketoacid_coenzyme_A_transferase_subunit_B	H13-1
5	0	0	GI:409893815 ~ GI:443621350 ~ GI:4155140	26695|652| ~ A45|1376| ~ J99|610|	Phosphoserine_phosphatase	H13-1
1	0	0	GI:409894586 ~ GI:443620055 ~ GI:4155930	26695|1416| ~ A45|119| ~ J99|1329|	hypothetical_protein	H13-1
4	0	0	GI:409893488 ~ GI:443620938 ~ GI:4154835	26695|315| ~ A45|968| ~ J99|313|	Guanylate_kinase	H13-1
1	0	0	GI:409894740 ~ GI:443620786 ~ GI:4156116	26695|1561| ~ A45|815| ~ J99|1492|	Riboflavin_synthase	H13-1
3	0	0	GI:409893966 ~ GI:443621197 ~ GI:4155325	26695|810| ~ A45|1218| ~ J99|762|	putative_polyketide_biosynthesis_zinc-dependent_hydrolase_PksB	H13-1
4	0	0	GI:409893991 ~ GI:443621171 ~ GI:4155343	26695|835| ~ A45|1194| ~ J99|789|	hypothetical_protein	H13-1
1	0	0	GI:409894483 ~ GI:443620595 ~ GI:4155855	26695|1316| ~ A45|623| ~ J99|1250|	Ribonuclease_HII	H13-1
6	0	0	GI:409893286 ~ GI:443621061 ~ GI:4154622	26695|120| ~ A45|1087| ~ J99|119|	Translation_initiation_factor_IF-3	H13-1
2	0	0	GI:409894658 ~ GI:443620657 ~ GI:4156006	26695|1483| ~ A45|681| ~ J99|1394|	hypothetical_protein	H13-1
1	0	0	GI:409894170 ~ GI:443620829 ~ GI:4154943	26695|1014| ~ A45|860| ~ J99|418|	hypothetical_protein	H13-1
1	0	0	NA	J99|1418|	Adenine_specific_DNA_methylase_Mod	H13-1
2	1	1	NA	A45|75|	Helicobacter_outer_membrane_protein	H13-1
5	0	0	GI:409894416 ~ GI:443620525 ~ GI:4155788	26695|1250| ~ A45|553| ~ J99|1186|	Orotate_phosphoribosyltransferase	H13-1
6	0	0	GI:443621172 ~ GI:4155342	A45|1195| ~ J99|788|	hypothetical_protein	H13-1
1	1	1	GI:409894414 ~ GI:443620523 ~ GI:4155798	26695|1248| ~ A45|551| ~ J99|1184|	Preprotein_translocase_band_1_subunit	H13-1
1	0	0	GI:409894087 ~ GI:443620392 ~ GI:4155434	26695|929| ~ A45|428| ~ J99|879|	queuosine_biosynthesis_protein_QueD	H13-1
12	0	0	GI:409893228 ~ GI:443621117 ~ GI:4154571	26695|66| ~ A45|1140| ~ J99|66|	Urease_accessory_protein_UreG	H13-1
1	0	0	GI:409893696 ~ GI:4155031	26695|531| ~ J99|494|	CAG_pathogenicity_island_protein_13	H13-1
2	0	0	GI:409893687 ~ GI:4155006	26695|523| ~ J99|487|	CagZ	H13-1
17	0	0	GI:409894729 ~ GI:443620775 ~ GI:4156103	26695|1550| ~ A45|804| ~ J99|1481|	putative_peroxiredoxin	H13-1
1	1	0	GI:409893312 ~ GI:443621037 ~ GI:4154647	26695|145| ~ A45|1063| ~ J99|143|	hypothetical_protein	H13-1
6	0	0	GI:409893947 ~ GI:443621216 ~ GI:4155294	26695|790| ~ A45|1237| ~ J99|743|	ATP-dependent_Clp_protease_proteolytic_subunit	H13-1
1	0	0	GI:409893570 ~ GI:443620484 ~ GI:4155568	26695|398| ~ A45|516| ~ J99|984|	hypothetical_protein	H13-1
1	0	0	GI:409893313 ~ GI:443621036 ~ GI:4154648	26695|146| ~ A45|1062| ~ J99|144|	hypothetical_protein	H13-1
1	0	0	GI:409893813 ~ GI:443621352 ~ GI:4155138	26695|650| ~ A45|1378| ~ J99|608|	Uracil_DNA_glycosylase_superfamily_protein ~ uracil-DNA_glycosylase,_family_4	H13-1
1	0	0	GI:409894441 ~ GI:443620550 ~ GI:4155806	26695|1275| ~ A45|580| ~ J99|1210|	Anthranilate_synthase_component_II	H13-1
4	0	0	GI:409893793 ~ GI:443621371 ~ GI:4155125	26695|630| ~ A45|1401| ~ J99|587|	Modulator_of_drug_activity_B	H13-1
2	0	0	NA	A45|1399|	Quinone-reactive_Ni/Fe-hydrogenase_small_chain_precursor	H13-1
1	0	0	NA	26695|1125|	hypothetical_protein	H13-1
1	0	0	GI:409894079 ~ GI:443620385 ~ GI:4155437	26695|921| ~ A45|421| ~ J99|870|	Recombination_protein_RecR	H13-1
1	1	1	GI:409894010 ~ GI:443620146 ~ GI:4155355	26695|854| ~ A45|202| ~ J99|804|	Phosphoheptose_isomerase_1	H13-1
4	0	0	GI:409893955 ~ GI:443621208 ~ GI:4155308	26695|798| ~ A45|1229| ~ J99|751|	GTP_cyclohydrolase-2	H13-1
9	0	0	GI:409894479 ~ GI:443620591 ~ GI:4155816	26695|1312| ~ A45|618| ~ J99|1246|	50S_ribosomal_protein_L3	H13-1
1	0	0	GI:409894637 ~ GI:443620637 ~ GI:4155994	26695|1464| ~ A45|662| ~ J99|1375|	Thymidylate_kinase	H13-1
5	2	1	GI:409893272 ~ GI:443621073 ~ GI:4154609	26695|107| ~ A45|1098| ~ J99|108|	HSP-70_cofactor	H13-1
7	1	1	GI:409893780 ~ GI:443621385 ~ GI:4155112	26695|617| ~ A45|1414| ~ J99|574|	Adenylate_kinase	H13-1
2	0	0	GI:409894285 ~ GI:443620262 ~ GI:4155649	26695|1128| ~ A45|308| ~ J99|1067|	Biopolymer_transport_protein_ExbB	H13-1
2	0	0	GI:409893504 ~ GI:443620920 ~ GI:4154857	26695|332| ~ A45|951| ~ J99|331|	hypothetical_protein	H13-1
4	1	1	GI:409894109 ~ GI:443620412 ~ GI:4155468	26695|949| ~ A45|448| ~ J99|899|	hypothetical_protein	H13-1
5	0	0	GI:409893535 ~ GI:443620448 ~ GI:4155593	26695|364| ~ A45|482| ~ J99|1018|	Deoxycytidine_triphosphate_deaminase	H13-1
5	0	0	GI:409894639 ~ GI:443620639 ~ GI:4155996	26695|1466| ~ A45|664| ~ J99|1377|	putative_aromatic_acid_decarboxylase	H13-1
7	0	0	GI:409893339 ~ GI:443621010 ~ GI:4154668	26695|172| ~ A45|1037| ~ J99|169|	Elongation_factor_P	H13-1
11	1	1	GI:409894262 ~ GI:443620239 ~ GI:4155624	26695|1105| ~ A45|286| ~ J99|1043|	Pyruvate_synthase_subunit_PorC	H13-1
6	0	0	GI:409893631 ~ GI:443620813 ~ GI:4154960	26695|466| ~ A45|844| ~ J99|435|	Helicobacter_outer_membrane_protein	H13-1
1	0	0	GI:409894662 ~ GI:443620661 ~ GI:4156010	26695|1487| ~ A45|685| ~ J99|1398|	Peptidyl-tRNA_hydrolase	H13-1
4	1	1	GI:409893753 ~ GI:443621412 ~ GI:4155077	26695|589| ~ A45|1440| ~ J99|552|	2-oxoglutarate-acceptor_oxidoreductase_subunit_OorC	H13-1
2	0	0	GI:409893442 ~ GI:443620123 ~ GI:4154782	26695|271| ~ A45|179| ~ J99|269|	Indole-3-glycerol_phosphate_synthase	H13-1
5	0	0	GI:409894415 ~ GI:443620524 ~ GI:4155787	26695|1249| ~ A45|552| ~ J99|1185|	Ribosome-releasing_factor	H13-1
4	3	3	GI:409894279 ~ GI:443620256 ~ GI:4155643	26695|1121| ~ A45|302| ~ J99|1061|	FKBP-type_peptidyl-prolyl_cis-trans_isomerase_SlyD	H13-1
8	0	0	GI:409894329 ~ GI:443620299 ~ GI:4155689	26695|1170| ~ A45|342| ~ J99|1108|	hypothetical_protein	H13-1
1	0	0	GI:409893938 ~ GI:443621224 ~ GI:4155278	26695|781| ~ A45|1245| ~ J99|735|	Outer-membrane_lipoprotein_carrier_protein_precursor	H13-1
8	2	2	GI:409893471 ~ GI:443620952 ~ GI:4154822	26695|300| ~ A45|981| ~ J99|299|	YceI-like_domain_protein ~ hypothetical_protein	H13-1
6	0	0	GI:409894393 ~ GI:443620376 ~ GI:4155756	26695|1230| ~ A45|413| ~ J99|1165|	hypothetical_protein	H13-1
7	0	0	GI:409893962 ~ GI:443621201 ~ GI:4155301	26695|805| ~ A45|1222| ~ J99|758|	flagellar_basal_body-associated_protein_FliL	H13-1
1	0	0	GI:409894037 ~ GI:443621495 ~ GI:4155386	26695|878| ~ A45|1519| ~ J99|828|	Holliday_junction_ATP-dependent_DNA_helicase_RuvA	H13-1
11	0	0	GI:409894446 ~ GI:443620556 ~ GI:4155810	26695|1280| ~ A45|586| ~ J99|1214|	hypothetical_protein	H13-1
8	0	0	GI:409894467 ~ GI:443620579 ~ GI:4155819	26695|1300| ~ A45|606| ~ J99|1234|	50S_ribosomal_protein_L5	H13-1
3	1	0	GI:409894404 ~ GI:443620512 ~ GI:4155774	26695|1238| ~ A45|541| ~ J99|1174|	Helix-destabilizing_protein	H13-1
7	0	0	GI:409893346 ~ GI:443620990 ~ GI:4154687	26695|179| ~ A45|1016| ~ J99|178|	hypothetical_protein	H13-1
7	1	1	GI:409894290 ~ GI:443620267 ~ GI:4155640	26695|1133| ~ A45|313| ~ J99|1072|	F0F1_ATP_synthase_subunit_delta	H13-1
6	0	0	GI:409893490 ~ GI:443620936 ~ GI:4154837	26695|317| ~ A45|966| ~ J99|315|	putative_cardiolipin_synthase_YwiE	H13-1
2	0	0	GI:409893675 ~ GI:443621462 ~ GI:4155004	26695|513| ~ A45|1488| ~ J99|476|	ATP-dependent_protease_subunit_HslV	H13-1
0	1	1	GI:409894694 ~ GI:443620691 ~ GI:4156039	26695|1518| ~ A45|721| ~ J99|1426|	futalosine_nucleosidase ~ nucleosidase	H13-1
2	0	0	GI:409894387 ~ GI:443620369 ~ GI:4155745	26695|1224| ~ A45|407| ~ J99|1159|	DNA_replication_regulator	H13-1
3	0	0	GI:409893439 ~ GI:443620126 ~ GI:4154779	26695|268| ~ A45|182| ~ J99|266|	hypothetical_protein	H13-1
6	0	0	GI:409894281 ~ GI:443620258 ~ GI:4155645	26695|1123| ~ A45|304| ~ J99|1063|	15_kDa_peptidoglycan-associated_lipoprotein	H13-1
2	0	0	GI:443620227	A45|275|	NADP-dependent_3-hydroxy_acid_dehydrogenase_YdfG	H13-1
8	0	0	GI:409893733 ~ GI:443621433 ~ GI:4155064	26695|569| ~ A45|1460| ~ J99|532|	Adenine_phosphoribosyltransferase	H13-1
1	0	0	GI:409894184 ~ GI:443620842 ~ GI:4154922	26695|1028| ~ A45|873| ~ J99|405|	hypothetical_protein	H13-1
1	0	0	GI:409893797 ~ GI:443621368 ~ GI:4155118	26695|634| ~ A45|1396| ~ J99|591|	Hydrogenase_2_maturation_protease	H13-1
11	0	0	GI:409894464 ~ GI:443620576 ~ GI:4155834	26695|1298| ~ A45|604| ~ J99|1232|	hypothetical_protein	H13-1
10	0	0	GI:409894661 ~ GI:443620660 ~ GI:4156009	26695|1486| ~ A45|684| ~ J99|1397|	General_stress_protein_CTC	H13-1
3	0	0	GI:409893438 ~ GI:443620127 ~ GI:4154778	26695|267| ~ A45|183| ~ J99|265|	hypothetical_protein	H13-1
2	0	0	GI:409893952 ~ GI:443621211 ~ GI:4155305	26695|795| ~ A45|1232| ~ J99|748|	Molybdopterin_adenylyltransferase	H13-1
2	0	0	GI:409893399 ~ GI:443620096 ~ GI:4154745	26695|230| ~ A45|155| ~ J99|227|	hypothetical_protein	H13-1
1	0	0	NA	A45|28|	hypothetical_protein	H13-1
4	0	0	GI:409893642 ~ GI:4154962	26695|477| ~ J99|445|	hypothetical_protein	H13-1
8	0	0	GI:409894619 ~ GI:443620618 ~ GI:4155961	26695|1446| ~ A45|644| ~ J99|1357|	LPP20_lipoprotein_precursor	H13-1
9	0	0	GI:409894362 ~ GI:443620339 ~ GI:4155723	26695|1198| ~ A45|379| ~ J99|1134|	hypothetical_protein	H13-1
4	2	1	GI:409893189 ~ GI:443621157 ~ GI:4154529	26695|24| ~ A45|1181| ~ J99|24|	hypothetical_protein	H13-1
3	0	0	GI:409894044 ~ GI:443621504 ~ GI:4155401	26695|886| ~ A45|1527| ~ J99|837|	acyl-CoA_esterase	H13-1
2	0	0	GI:409893946 ~ GI:443621217 ~ GI:4155293	26695|789| ~ A45|1238| ~ J99|742|	Peptide_deformylase ~ Peptide_deformylase_1	H13-1
3	0	0	GI:409893783 ~ GI:443621382 ~ GI:4155114	26695|620| ~ A45|1411| ~ J99|578|	Inorganic_pyrophosphatase	H13-1
5	1	0	GI:409894291 ~ GI:443620268 ~ GI:4155641	26695|1134| ~ A45|314| ~ J99|1073|	F0F1_ATP_synthase_subunit_B	H13-1
2	0	0	GI:409893828 ~ GI:443621338 ~ GI:4155148	26695|664| ~ A45|1364| ~ J99|622|	hypothetical_protein	H13-1
1	0	0	GI:409894370 ~ GI:443620347 ~ GI:4155735	26695|1206| ~ A45|387| ~ J99|1142|	Serine_acetyltransferase	H13-1
3	0	0	GI:409894193 ~ GI:443620851 ~ GI:4154913	26695|1037| ~ A45|882| ~ J99|396|	3-dehydroquinate_dehydratase	H13-1
1	0	0	GI:409894711 ~ GI:443620758 ~ GI:4156080	26695|1533| ~ A45|787| ~ J99|1463|	hypothetical_protein	H13-1
3	0	0	GI:409893230 ~ GI:443621115 ~ GI:4154560	26695|68| ~ A45|1138| ~ J99|68|	Urease_accessory_protein_UreE	H13-1
3	0	0	GI:409894519 ~ GI:443620199 ~ GI:4155877	26695|1351| ~ A45|249| ~ J99|1283|	hypothetical_protein	H13-1
5	0	0	GI:409894705 ~ GI:443620752 ~ GI:4156094	26695|1527| ~ A45|781| ~ J99|1469|	Ubiquinol-cytochrome_c_reductase_iron-sulfur_subunit	H13-1
7	2	1	GI:409893816 ~ GI:443621349 ~ GI:4155130	26695|653| ~ A45|1375| ~ J99|611|	Ferritin	H13-1
12	1	1	GI:409893553 ~ GI:443620467 ~ GI:4155579	26695|382| ~ A45|500| ~ J99|1000|	putative_thiol_peroxidase	H13-1
0	1	0	GI:409893328 ~ GI:443621021 ~ GI:4154669	26695|162| ~ A45|1047| ~ J99|159|	hypothetical_protein	H13-1
2	0	0	NA	26695|687|	putative_3'-5'_exonuclease_related_to_the_exonuclease_domain_of_PolB	H13-1
7	0	0	GI:409893554 ~ GI:443620468 ~ GI:4155569	26695|383| ~ A45|501| ~ J99|999|	Chemotaxis_protein_CheW	H13-1
2	1	1	GI:409893573 ~ GI:443620486 ~ GI:4155552	26695|400| ~ A45|518| ~ J99|982|	hypothetical_protein	H13-1
10	0	0	NA	A45|939|	hypothetical_protein	H13-1
3	0	0	GI:409894019 ~ GI:443620155 ~ GI:4155364	26695|863| ~ A45|211| ~ J99|813|	Transcript_cleavage_factor_GreA	H13-1
6	2	2	GI:409894359 ~ GI:443620336 ~ GI:4155720	26695|1195| ~ A45|376| ~ J99|1131|	50S_ribosomal_protein_L10	H13-1
7	0	0	GI:409894316 ~ GI:443620311 ~ GI:4155685	26695|1158| ~ A45|354| ~ J99|1096|	Flavodoxin	H13-1
1	0	0	GI:409894191 ~ GI:443620849 ~ GI:4154911	26695|1035| ~ A45|880| ~ J99|398|	2-amino-4-hydroxy-6-_hydroxymethyldihydropteridine_pyrophosphokinase	H13-1
6	0	0	GI:409894604 ~ GI:443620711 ~ GI:4155944	26695|1433| ~ A45|738| ~ J99|1344|	Peptidyl-prolyl_cis-trans_isomerase_B	H13-1
1	0	0	GI:409893628 ~ GI:443620816 ~ GI:4154957	26695|463| ~ A45|847| ~ J99|432|	hypothetical_protein	H13-1
7	0	0	GI:409893534 ~ GI:443620447 ~ GI:4155592	26695|363| ~ A45|481| ~ J99|1019|	Biotin_carboxyl_carrier_protein_of_acetyl-CoA_carboxylase	H13-1
3	0	0	GI:409894215 ~ GI:443620873 ~ GI:4154889	26695|1059| ~ A45|904| ~ J99|375|	Sec-independent_protein_translocase_protein_TatB	H13-1
3	0	0	GI:409894537 ~ GI:443620213 ~ GI:4155894	26695|1369| ~ A45|263| ~ J99|1297|	3-hydroxyacyl-[acyl-carrier-protein]_dehydratase_FabZ	H13-1
4	0	0	GI:409894421 ~ GI:443620529 ~ GI:4155792	26695|1255| ~ A45|557| ~ J99|1190|	NADH-quinone_oxidoreductase_subunit_6	H13-1
1	0	0	GI:409893951 ~ GI:443621212 ~ GI:4155304	26695|794| ~ A45|1233| ~ J99|747|	Molybdenum_cofactor_biosynthesis_protein_C	H13-1
2	0	0	GI:409894385 ~ GI:443620367 ~ GI:4155743	26695|1222| ~ A45|405| ~ J99|1157|	RNA_pyrophosphohydrolase	H13-1
3	0	0	GI:409894638 ~ GI:443620638 ~ GI:4155995	26695|1465| ~ A45|663| ~ J99|1376|	Phosphopantetheine_adenylyltransferase	H13-1
1	1	1	GI:409893454 ~ GI:443620111 ~ GI:4154797	26695|283| ~ A45|167| ~ J99|281|	hypothetical_protein	H13-1
1	0	0	GI:409894030 ~ GI:443620167 ~ GI:4155374	26695|874| ~ A45|223| ~ J99|824|	Crossover_junction_endodeoxyribonuclease_RuvC	H13-1
1	0	0	GI:443620716 ~ GI:4155511	A45|742| ~ J99|945|	hypothetical_protein	H13-1
9	1	1	GI:409893165 ~ GI:443620802 ~ GI:4154505	26695|2| ~ A45|834| ~ J99|2|	6,7-dimethyl-8-ribityllumazine_synthase	H13-1
2	2	2	GI:443621406	A45|1435|	tumor_necrosis_factor_alpha-inducing_protein	H13-1
9	0	0	GI:409894354 ~ GI:443620331 ~ GI:4155708	26695|1191| ~ A45|372| ~ J99|1127|	hypothetical_protein	H13-1
1	0	0	GI:409893267 ~ GI:443621078 ~ GI:4154616	26695|102| ~ A45|1103| ~ J99|103|	S-ribosylhomocysteine_lyase	H13-1
1	0	0	GI:409894417 ~ GI:443620526 ~ GI:4155789	26695|1251| ~ A45|554| ~ J99|1187|	RDD_family_protein	H13-1
1	0	0	GI:409894118	26695|958|	Acyl_carrier_protein	H13-1
5	0	0	GI:409893890 ~ GI:443621271 ~ GI:4155234	26695|733| ~ A45|1297| ~ J99|687|	xanthine-guanine_phosphoribosyltransferase	H13-1
5	0	0	GI:409893877 ~ GI:443621286 ~ GI:4155213	26695|719| ~ A45|1312| ~ J99|673|	hypothetical_protein	H13-1
1	0	0	GI:409894021 ~ GI:443620157 ~ GI:4155352	26695|865| ~ A45|213| ~ J99|815|	hypothetical_protein	H13-1
4	1	1	GI:409893735 ~ GI:443621431 ~ GI:4155066	26695|571| ~ A45|1458| ~ J99|534|	Putative_sugar_phosphate_isomerase_YwlF	H13-1
7	2	2	GI:409893297 ~ GI:443621051 ~ GI:4154631	26695|130| ~ A45|1077| ~ J99|129|	Putative_peroxiredoxin_bcp	H13-1
3	0	0	GI:409894608 ~ GI:443620707 ~ GI:4155948	26695|1437| ~ A45|734| ~ J99|1348|	Biopolymer_transport_protein_ExbB	H13-1
8	1	1	GI:409894182 ~ GI:443620840 ~ GI:4154920	26695|1026| ~ A45|871| ~ J99|407|	Ferric_uptake_regulation_protein	H13-1
9	0	0	GI:409893674 ~ GI:443621461 ~ GI:4155003	26695|512| ~ A45|1487| ~ J99|475|	50S_ribosomal_protein_L9	H13-1
5	1	1	GI:409894576 ~ GI:443620044 ~ GI:4155926	26695|1404| ~ A45|105| ~ J99|1317|	NADPH-dependent_7-cyano-7-deazaguanine_reductase	H13-1
3	0	0	GI:409894498 ~ GI:443620610 ~ GI:4155871	26695|1331| ~ A45|638| ~ J99|1263|	Putative_nickel-responsive_regulator	H13-1
10	0	0	GI:409894462 ~ GI:443620574 ~ GI:4155832	26695|1296| ~ A45|602| ~ J99|1230|	hypothetical_protein	H13-1
3	1	1	GI:409894538 ~ GI:443620214 ~ GI:4155903	26695|1370| ~ A45|264| ~ J99|1298|	Flagellar_assembly_factor_FliW_2	H13-1
5	0	0	GI:409893290 ~ GI:443621057 ~ GI:4154637	26695|124| ~ A45|1083| ~ J99|123|	hypothetical_protein	H13-1
2	0	0	GI:409894018 ~ GI:443620154 ~ GI:4155363	26695|862| ~ A45|210| ~ J99|812|	Deoxyuridine_5'-triphosphate_nucleotidohydrolase	H13-1
1	0	0	GI:409894667 ~ GI:443620667 ~ GI:4156015	26695|1491| ~ A45|693| ~ J99|1402|	putative_integral_membrane_protein	H13-1
2	0	0	GI:409894499 ~ GI:443620611 ~ GI:4155859	26695|1332| ~ A45|639| ~ J99|1264|	Biopolymer_transport_protein_ExbB	H13-1
14	0	0	GI:409893409 ~ GI:443620086 ~ GI:4154739	26695|239| ~ A45|145| ~ J99|236|	DNA_protection_during_starvation_protein	H13-1
4	1	0	GI:409894292 ~ GI:443620269 ~ GI:4155642	26695|1135| ~ A45|315| ~ J99|1074|	F-type_ATPase_subunit_b ~ F0F1_ATP_synthase_subunit_B'	H13-1
2	0	0	GI:409894745 ~ GI:443620790 ~ GI:4156109	26695|1566| ~ A45|821| ~ J99|1496|	hypothetical_protein	H13-1
10	0	0	GI:409894405 ~ GI:443620513 ~ GI:4155764	26695|1239| ~ A45|542| ~ J99|1175|	30S_ribosomal_protein_S6 ~ hypothetical_protein	H13-1
3	0	0	GI:409893585 ~ GI:443620495 ~ GI:4155543	26695|412| ~ A45|526| ~ J99|973|	fatty_acid_biosynthesis_transcriptional_regulator	H13-1
5	0	0	GI:409894472 ~ GI:443620584 ~ GI:4155824	26695|1305| ~ A45|611| ~ J99|1239|	50S_ribosomal_protein_L16	H13-1
7	0	0	GI:409893245 ~ GI:443621101 ~ GI:4154587	26695|81| ~ A45|1124| ~ J99|80|	50S_ribosomal_protein_L13	H13-1
8	0	0	GI:409894361 ~ GI:443620338 ~ GI:4155722	26695|1197| ~ A45|378| ~ J99|1133|	50S_ribosomal_protein_L11	H13-1
4	0	0	GI:443621287 ~ GI:4155219	A45|1313| ~ J99|672|	hypothetical_protein	H13-1
2	0	0	GI:409893164 ~ GI:443620801 ~ GI:4154504	26695|1| ~ A45|833| ~ J99|1|	hypothetical_protein	H13-1
3	0	0	GI:409893192 ~ GI:4154532	26695|27| ~ J99|27|	Universal_stress_protein_family_protein	H13-1
6	1	0	GI:409893360 ~ GI:443621001 ~ GI:4154691	26695|193| ~ A45|1027| ~ J99|190|	Nucleoside_diphosphate_kinase	H13-1
5	0	0	GI:409894355 ~ GI:443620332 ~ GI:4155709	26695|1192| ~ A45|373| ~ J99|1128|	30S_ribosomal_protein_S12	H13-1
2	0	0	GI:409894220 ~ GI:443620878 ~ GI:4154894	26695|1064| ~ A45|909| ~ J99|370|	hypothetical_protein	H13-1
4	1	0	GI:409894309 ~ GI:443620318 ~ GI:4155665	26695|1151| ~ A45|361| ~ J99|1089|	Flagellar_assembly_factor_FliW_1	H13-1
7	0	0	GI:409894609 ~ GI:443620706 ~ GI:4155949	26695|1438| ~ A45|733| ~ J99|1349|	Biopolymer_transport_protein_ExbD	H13-1
3	0	0	GI:409893657 ~ GI:443621483 ~ GI:4154984	26695|493| ~ A45|1508| ~ J99|460|	Acyl-CoA_thioester_hydrolase_YbgC	H13-1
6	0	0	GI:409894461 ~ GI:443620573 ~ GI:4155831	26695|1295| ~ A45|601| ~ J99|1229|	50S_ribosomal_protein_L15	H13-1
2	0	0	GI:409894420 ~ GI:443620528 ~ GI:4155791	26695|1254| ~ A45|556| ~ J99|1189|	NAD(P)H-quinone_oxidoreductase_subunit_3	H13-1
1	0	0	GI:409894284 ~ GI:443620261 ~ GI:4155648	26695|1127| ~ A45|307| ~ J99|1066|	Biopolymer_transport_protein_ExbD	H13-1
2	0	0	GI:409894455 ~ GI:443620567 ~ GI:4155843	26695|1289| ~ A45|596| ~ J99|1223|	30S_ribosomal_protein_S11	H13-1
11	0	0	GI:409894465 ~ GI:443620577 ~ GI:4155835	26695|1299| ~ A45|605| ~ J99|1233|	30S_ribosomal_protein_S8	H13-1
3	1	1	GI:409894263 ~ GI:443620240 ~ GI:4155625	26695|1106| ~ A45|287| ~ J99|1044|	Pyruvic-ferredoxin_oxidoreductase_subunit_delta	H13-1
5	0	0	GI:409893244 ~ GI:443621102 ~ GI:4154586	26695|80| ~ A45|1125| ~ J99|79|	hypothetical_protein	H13-1
3	1	0	GI:409894500 ~ GI:443620612 ~ GI:4155860	26695|1333| ~ A45|640| ~ J99|1265|	Biopolymer_transport_protein_ExbD	H13-1
1	0	0	GI:443620686	A45|716|	Helicobacter_outer_membrane_protein	H13-1
6	0	0	GI:409894716 ~ GI:443620763	26695|1538| ~ A45|792|	preprotein_translocase_subunit_YajC	H13-1
2	0	0	GI:409893367 ~ GI:4154709	26695|200| ~ J99|196|	hypothetical_protein	H13-1
1	0	0	GI:409894486 ~ GI:443620598 ~ GI:4155846	26695|1319| ~ A45|626| ~ J99|1252|	hypothetical_protein	H13-1
4	0	0	GI:409894099 ~ GI:443620404 ~ GI:4155446	26695|940| ~ A45|440| ~ J99|891|	RutC_family_protein	H13-1
5	1	1	GI:409894358 ~ GI:443620335 ~ GI:4155719	26695|1194| ~ A45|375| ~ J99|1130|	hypothetical_protein	H13-1
5	0	0	GI:409894222 ~ GI:443620880 ~ GI:4154896	26695|1066| ~ A45|911| ~ J99|368|	hypothetical_protein	H13-1
2	0	0	GI:409894286 ~ GI:443620263 ~ GI:4155650	26695|1129| ~ A45|309| ~ J99|1068|	F-ATPase_epsilon_subunit	H13-1
6	0	0	GI:409894469 ~ GI:443620581 ~ GI:4155821	26695|1302| ~ A45|608| ~ J99|1236|	50S_ribosomal_protein_L14	H13-1
5	0	0	GI:409894474 ~ GI:443620586 ~ GI:4155826	26695|1307| ~ A45|613| ~ J99|1241|	50S_ribosomal_protein_L22	H13-1
1	0	0	GI:409893785 ~ GI:443621380 ~ GI:4155105	26695|622| ~ A45|1409| ~ J99|580|	hypothetical_protein	H13-1
6	0	0	GI:443620164	A45|220|	Catalase	H13-1
11	0	0	GI:409894456 ~ GI:443620568 ~ GI:4155844	26695|1290| ~ A45|597| ~ J99|1224|	30S_ribosomal_protein_S13 ~ hypothetical_protein	H13-1
1	0	0	GI:409893906 ~ GI:443621255 ~ GI:4155242	26695|749| ~ A45|1280| ~ J99|703|	flagellar_protein_FlaG	H13-1
6	0	0	GI:409893173 ~ GI:443619998 ~ GI:4154503	26695|9| ~ A45|63| ~ J99|9|	co-chaperonin_GroES	H13-1
5	0	0	GI:409894463 ~ GI:443620575 ~ GI:4155833	26695|1297| ~ A45|603| ~ J99|1231|	hypothetical_protein	H13-1
6	0	0	GI:409894302 ~ GI:443620325 ~ GI:4155668	26695|1144| ~ A45|368| ~ J99|1082|	50S_ribosomal_protein_L19	H13-1
1	0	0	GI:409894085	26695|927|	hypothetical_protein	H13-1
1	0	0	GI:409894022 ~ GI:443620158 ~ GI:4155353	26695|866| ~ A45|214| ~ J99|816|	Hydrogenase/urease_nickel_incorporation_protein_HypA	H13-1
1	0	0	GI:409894675 ~ GI:443620675 ~ GI:4156024	26695|1499| ~ A45|701| ~ J99|1410|	FolB_domain_protein	H13-1
2	0	0	NA	26695|833|	hypothetical_protein	H13-1
4	0	0	GI:409894452 ~ GI:443620564 ~ GI:4155840	26695|1286| ~ A45|593| ~ J99|1220|	50S_ribosomal_protein_L17	H13-1
3	0	0	GI:409893288 ~ GI:443621059 ~ GI:4154635	26695|122| ~ A45|1085| ~ J99|121|	50S_ribosomal_protein_L20	H13-1
0	1	1	GI:409894688 ~ GI:443620685 ~ GI:4156034	26695|1513| ~ A45|715| ~ J99|1421|	hypothetical_protein	H13-1
3	0	0	GI:409893708 ~ GI:4155028	26695|542| ~ J99|505|	hypothetical_protein	H13-1
2	0	0	GI:409893680 ~ GI:4155012	26695|518| ~ J99|481|	hypothetical_protein	H13-1
1	0	0	GI:409894618 ~ GI:443620617 ~ GI:4155960	26695|1445| ~ A45|643| ~ J99|1356|	hypothetical_protein	H13-1
1	0	0	GI:409894380 ~ GI:443620362 ~ GI:4155751	26695|1217| ~ A45|400| ~ J99|1152|	molybdopterin_biosynthesis_protein_MoeB	H13-1
3	0	0	GI:409893750 ~ GI:443621415 ~ GI:4155083	26695|586| ~ A45|1443| ~ J99|549|	Periplasmic_[Fe]_hydrogenase_large_subunit	H13-1
2	0	0	GI:409894577 ~ GI:443620045 ~ GI:4155927	26695|1405| ~ A45|106| ~ J99|1318|	Ribosomal_silencing_factor_RsfS	H13-1
1	0	0	NA	A45|1283|	hypothetical_protein	H13-1
3	0	0	GI:409893776 ~ GI:443621389 ~ GI:4155108	26695|613| ~ A45|1418| ~ J99|570|	hypothetical_protein	H13-1
1	0	0	GI:409893734 ~ GI:443621432 ~ GI:4155065	26695|570| ~ A45|1459| ~ J99|533|	hypothetical_protein	H13-1
10	0	0	GI:409893977 ~ GI:443621185 ~ GI:4155328	26695|821| ~ A45|1207| ~ J99|776|	Thioredoxin	H13-1
1	0	0	GI:409893886 ~ GI:443621277 ~ GI:4155229	26695|728| ~ A45|1303| ~ J99|682|	hypothetical_protein	H13-1
3	0	0	GI:409893462 ~ GI:443620961 ~ GI:4154806	26695|291| ~ A45|990| ~ J99|289|	50S_ribosomal_protein_L21	H13-1
5	0	0	GI:409894621 ~ GI:443620620 ~ GI:4155972	26695|1448| ~ A45|646| ~ J99|1359|	Thioredoxin	H13-1
6	0	0	GI:409894480 ~ GI:443620592 ~ GI:4155817	26695|1313| ~ A45|619| ~ J99|1247|	hypothetical_protein	H13-1
1	1	1	NA	26695|1529| ~ A45|783| ~ J99|1467|	Polymer-forming_cytoskeletal	H13-1
2	0	0	GI:409893568 ~ GI:443620482 ~ GI:4155566	26695|396| ~ A45|514| ~ J99|986|	HIT-like_protein	H13-1
4	0	0	NA	26695|834|	hypothetical_protein	H13-1
1	0	0	NA ~ GI:443621006 ~ GI:4154708	26695|198| ~ A45|1032| ~ J99|195|	hypothetical_protein	H13-1
2	0	0	GI:409893196 ~ GI:443621149 ~ GI:4154536	26695|31| ~ A45|1173| ~ J99|31|	Nucleoid-associated_protein	H13-1
1	0	0	GI:4155393	J99|838|	mRNA_interferase_YafQ	H13-1
3	0	0	GI:409894055 ~ GI:443621512 ~ GI:4155409	26695|896| ~ A45|1534| ~ J99|850|	hypothetical_protein ~ Cupin_domain_protein	H13-1
2	0	0	GI:409894100	26695|941|	hypothetical_protein	H13-1
1	0	0	GI:409893807 ~ GI:443621357 ~ GI:4155132	26695|644| ~ A45|1383| ~ J99|602|	YGGT_family_protein	H13-1
4	0	0	GI:4156070	J99|1458|	preprotein_translocase_subunit_YajC	H13-1
2	0	0	GI:409894384 ~ GI:443620366 ~ GI:4155742	26695|1221| ~ A45|404| ~ J99|1156|	Cytochrome_c553	H13-1
1	0	0	GI:409894121	26695|963|	Endoribonuclease_VapD	H13-1
6	2	2	GI:409893989 ~ GI:443621174 ~ GI:4155341	26695|832| ~ A45|1196| ~ J99|787|	HCj	H13-1
4	0	0	GI:409894475 ~ GI:443620587 ~ GI:4155812	26695|1308| ~ A45|614| ~ J99|1242|	30S_ribosomal_protein_S19	H13-1
4	0	0	GI:409894477 ~ GI:443620589 ~ GI:4155814	26695|1310| ~ A45|616| ~ J99|1244|	50S_ribosomal_protein_L23	H13-1
1	0	0	GI:443619961	A45|26|	hypothetical_protein	H13-1
1	0	0	GI:409893318 ~ GI:443621032 ~ GI:4154656	26695|151| ~ A45|1057| ~ J99|149|	hypothetical_protein	H13-1
2	0	0	GI:409894195 ~ GI:443620853 ~ GI:4154915	26695|1039| ~ A45|884| ~ J99|394|	30S_ribosomal_protein_S15	H13-1
1	0	0	GI:409893237 ~ GI:443621108 ~ GI:4154580	26695|74| ~ A45|1132| ~ J99|74|	hypothetical_protein	H13-1
1	0	0	GI:409894657 ~ GI:443620656 ~ GI:4156005	26695|1482| ~ A45|680| ~ J99|1393|	Fe/S_biogenesis_protein_NfuA	H13-1
2	0	0	GI:443621154	A45|1178|	Universal_stress_protein_family_protein	H13-1
5	0	0	GI:409893463 ~ GI:443620960 ~ GI:4154807	26695|292| ~ A45|989| ~ J99|290|	50S_ribosomal_protein_L27	H13-1
3	0	0	GI:409894470 ~ GI:443620582 ~ GI:4155822	26695|1303| ~ A45|609| ~ J99|1237|	30S_ribosomal_protein_S17	H13-1
3	0	0	GI:409893387 ~ GI:443620970 ~ GI:4154729	26695|219| ~ A45|996| ~ J99|216|	hypothetical_protein	H13-1
2	0	0	GI:409894403 ~ GI:443620511 ~ GI:4155773	26695|1237| ~ A45|540| ~ J99|1173|	hypothetical_protein	H13-1
1	0	0	NA	26695|1126|	hypothetical_protein	H13-1
1	0	0	GI:409894585 ~ GI:443620054 ~ GI:4155923	26695|1415| ~ A45|118| ~ J99|1328|	S4_domain_protein	H13-1
5	0	0	GI:409893980 ~ GI:443621182 ~ GI:4155331	26695|824| ~ A45|1204| ~ J99|779|	splicing_factor,_CC1-like_family	H13-1
3	0	0	GI:409893725 ~ GI:443621441 ~ GI:4155050	26695|561| ~ A45|1468| ~ J99|522|	hypothetical_protein	H13-1
1	0	0	GI:409893434 ~ GI:443620131 ~ GI:4154787	26695|263| ~ A45|187| ~ J99|261|	hypothetical_protein	H13-1
1	0	0	GI:409894219 ~ GI:443620877 ~ GI:4154893	26695|1063| ~ A45|908| ~ J99|371|	hypothetical_protein	H13-1
3	0	0	GI:409893721 ~ GI:443621445 ~ GI:4155045	26695|557| ~ A45|1472| ~ J99|518|	Acyl_carrier_protein	H13-1
1	0	0	GI:409893747 ~ GI:443621418 ~ GI:4155075	26695|583| ~ A45|1446| ~ J99|546|	FeoA_domain_protein	H13-1
2	0	0	GI:409893499 ~ GI:443620926 ~ GI:4154853	26695|326| ~ A45|956| ~ J99|325|	Cell_division_topological_specificity_factor	H13-1
1	0	0	GI:409894306 ~ GI:443620321 ~ GI:4155672	26695|1148| ~ A45|364| ~ J99|1086|	hypothetical_protein	H13-1
2	0	0	GI:409894398 ~ GI:443620381 ~ GI:4155772	26695|1235| ~ A45|418| ~ J99|1171|	hypothetical_protein	H13-1
1	0	0	GI:409894605 ~ GI:443620710 ~ GI:4155945	26695|1434| ~ A45|737| ~ J99|1345|	hypothetical_protein	H13-1
1	0	0	GI:409893930 ~ GI:443621232 ~ GI:4155269	26695|773| ~ A45|1253| ~ J99|727|	DNA-directed_RNA_polymerase_subunit_omega	H13-1
1	0	0	GI:409894468 ~ GI:443620580 ~ GI:4155820	26695|1301| ~ A45|607| ~ J99|1235|	50S_ribosomal_protein_L24	H13-1
2	0	0	GI:409894458 ~ GI:443620570 ~ GI:4155828	26695|1292| ~ A45|598| ~ J99|1226|	Translation_initiation_factor_IF-1	H13-1
1	0	0	GI:409893308 ~ GI:443621041 ~ GI:4154644	26695|141| ~ A45|1067| ~ J99|139|	cytochrome_c_oxidase,_cbb3-type,_CcoQ_subunit	H13-1
3	0	0	GI:409894086	26695|928|	hypothetical_protein	H13-1
4	0	0	GI:409893723 ~ GI:443621443 ~ GI:4155048	26695|559| ~ A45|1470| ~ J99|520|	30S_ribosomal_protein_S21	H13-1
2	0	0	GI:409894078 ~ GI:443620384 ~ GI:4155428	26695|920| ~ A45|420| ~ J99|869|	putative_tautomerase	H13-1
1	0	0	GI:409893310 ~ GI:443621039 ~ GI:4154646	26695|143| ~ A45|1065| ~ J99|141|	hypothetical_protein	H13-1
2	0	0	GI:409893713 ~ GI:443621453 ~ GI:4155038	26695|549| ~ A45|1479| ~ J99|510|	50S_ribosomal_protein_L31	H13-1
5	0	0	GI:409894471 ~ GI:443620583 ~ GI:4155823	26695|1304| ~ A45|610| ~ J99|1238|	50S_ribosomal_protein_L29	H13-1
4	0	0	GI:409894228 ~ GI:443620886 ~ GI:4154886	26695|1071| ~ A45|916| ~ J99|363|	Copper_ion-binding_protein	H13-1
1	0	0	GI:409893652 ~ GI:443621488 ~ GI:4154978	26695|488| ~ A45|1513| ~ J99|455|	50S_ribosomal_protein_L28	H13-1
1	0	0	GI:443620095	A45|154|	Putative_beta-lactamase_HcpC_precursor	H13-1
1	0	0	GI:409894031	26695|875|	hypothetical_protein	H13-1
2	0	0	GI:409893876	26695|718|	hypothetical_protein	H13-1
1	0	0	GI:409894364 ~ GI:443620341 ~ GI:4155730	26695|1200| ~ A45|381| ~ J99|1136|	50S_ribosomal_protein_L33_2	H13-1
1	0	0	NA	A45|743|	hypothetical_protein	H13-1
2	0	0	GI:409893296 ~ GI:443621052 ~ GI:4154630	26695|129| ~ A45|1078| ~ J99|128|	hypothetical_protein	H13-1
1	0	0	NA	26695|694|	hypothetical_protein	H13-1
